# Supplementary material for: Methods for significance testing of categorical covariates in logistic regression models after multiple imputation: power and applicability analysis
Source: Springer Nature journal article supplement (doi:10.1186/s12874-017-0404-7), 2017-08-22

**Table B1a. Type I error with beta equaling zero.40% missing data & Cor = 0.2**

| <b>Factor</b> | <b>True</b> | <b>RR</b> | <b>MR</b> | <b>CHI</b> | <b>VAR</b> | <b>MPRout</b> | <b>MPRin</b> |
|---------------|-------------|-----------|-----------|------------|------------|---------------|--------------|
| <b>covar1</b> | 0.057       | 0.069     | 0.014     | 0.015      | 0.015      | 0.02          | 0.088        |
| <b>covar2</b> | 0.056       | 0.044     | 0.041     | 0.048      | 0.044      | 0.02          | 0.123        |
| <b>covar3</b> | 0.056       | 0.058     | 0.058     | 0.06       | 0.058      | 0.053         | 0.066        |
| <b>covar4</b> | 0.043       | 0.065     | 0.063     | 0.068      | 0.065      | 0.046         | 0.082        |
|               | 0.07        | 0.048     | 0.049     | 0.048      | 0.048      | 0.054         | 0.058        |

**Table B1b. Type I error with beta equaling zero.40% missing data & Cor = 0.4**

| <b>Factor</b> | <b>True</b> | <b>RR</b> | <b>MR</b> | <b>CHI</b> | <b>VAR</b> | <b>MPRout</b> | <b>MPRin</b> |
|---------------|-------------|-----------|-----------|------------|------------|---------------|--------------|
| <b>covar1</b> | 0.057       | 0.072     | 0.013     | 0.012      | 0.016      | 0.014         | 0.085        |
| <b>covar2</b> | 0.056       | 0.05      | 0.05      | 0.057      | 0.05       | 0.016         | 0.152        |
| <b>covar3</b> | 0.056       | 0.057     | 0.058     | 0.06       | 0.057      | 0.059         | 0.062        |
| <b>covar4</b> | 0.043       | 0.063     | 0.066     | 0.066      | 0.063      | 0.046         | 0.074        |
| <b>covar4</b> | 0.07        | 0.051     | 0.055     | 0.055      | 0.051      | 0.048         | 0.064        |

**Table B1c. Type I error with beta equaling zero.40% missing data & Cor = 0.6**

|               | <b>True</b> | <b>RR</b> | <b>MR</b> | <b>CHI</b> | <b>VAR</b> | <b>MPRout</b> | <b>MPRin</b> |
|---------------|-------------|-----------|-----------|------------|------------|---------------|--------------|
| <b>Factor</b> | 0.061       | 0.075     | 0.02      | 0.019      | 0.021      | 0.014         | 0.083        |
| <b>covar1</b> | 0.058       | 0.038     | 0.037     | 0.043      | 0.038      | 0.018         | 0.12         |
| <b>covar2</b> | 0.065       | 0.05      | 0.051     | 0.054      | 0.05       | 0.053         | 0.066        |
| <b>covar3</b> | 0.059       | 0.042     | 0.044     | 0.047      | 0.042      | 0.039         | 0.051        |
| <b>covar4</b> | 0.063       | 0.067     | 0.064     | 0.071      | 0.067      | 0.067         | 0.085        |

**Table B1d. Type I error with beta equaling zero.40% missing data & Cor = 0.8**

| <b>Factor</b> | <b>True</b> | <b>RR</b> | <b>MR</b> | <b>CHI</b> | <b>VAR</b> | <b>MPRout</b> | <b>MPRin</b> |
|---------------|-------------|-----------|-----------|------------|------------|---------------|--------------|
| <b>covar1</b> | 0.057       | 0.074     | 0.014     | 0.016      | 0.015      | 0.014         | 0.098        |
| <b>covar2</b> | 0.056       | 0.05      | 0.044     | 0.053      | 0.049      | 0.014         | 0.127        |
| <b>covar3</b> | 0.056       | 0.055     | 0.06      | 0.057      | 0.055      | 0.054         | 0.061        |
| <b>covar4</b> | 0.043       | 0.063     | 0.064     | 0.067      | 0.063      | 0.044         | 0.074        |
|               | 0.07        | 0.049     | 0.053     | 0.053      | 0.049      | 0.055         | 0.064        |

# Power for categorical variable (cor=0.2;0.25% missing)

Outcome included for all pooling methods

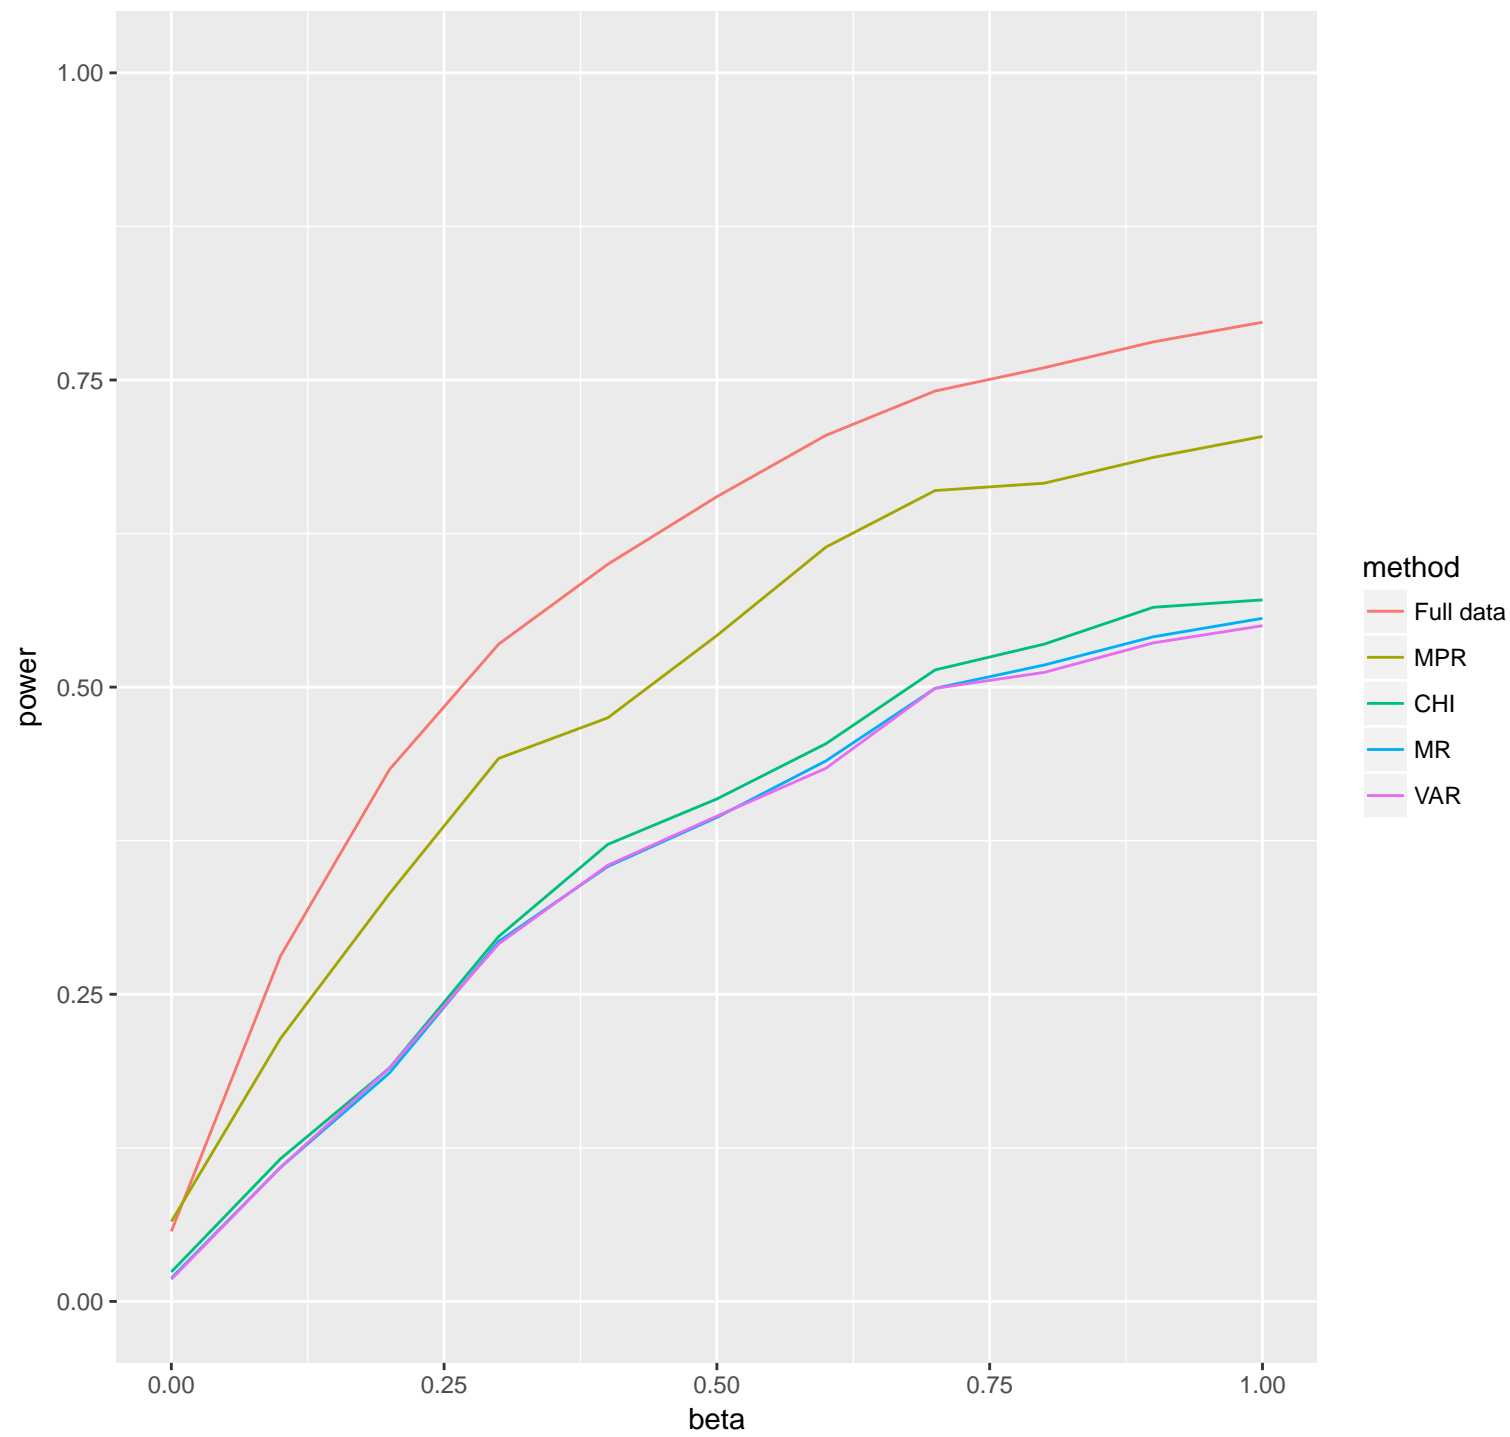

# Power for continuous variable (cor=0.2;0.25% missing)

Outcome included for all pooling methods

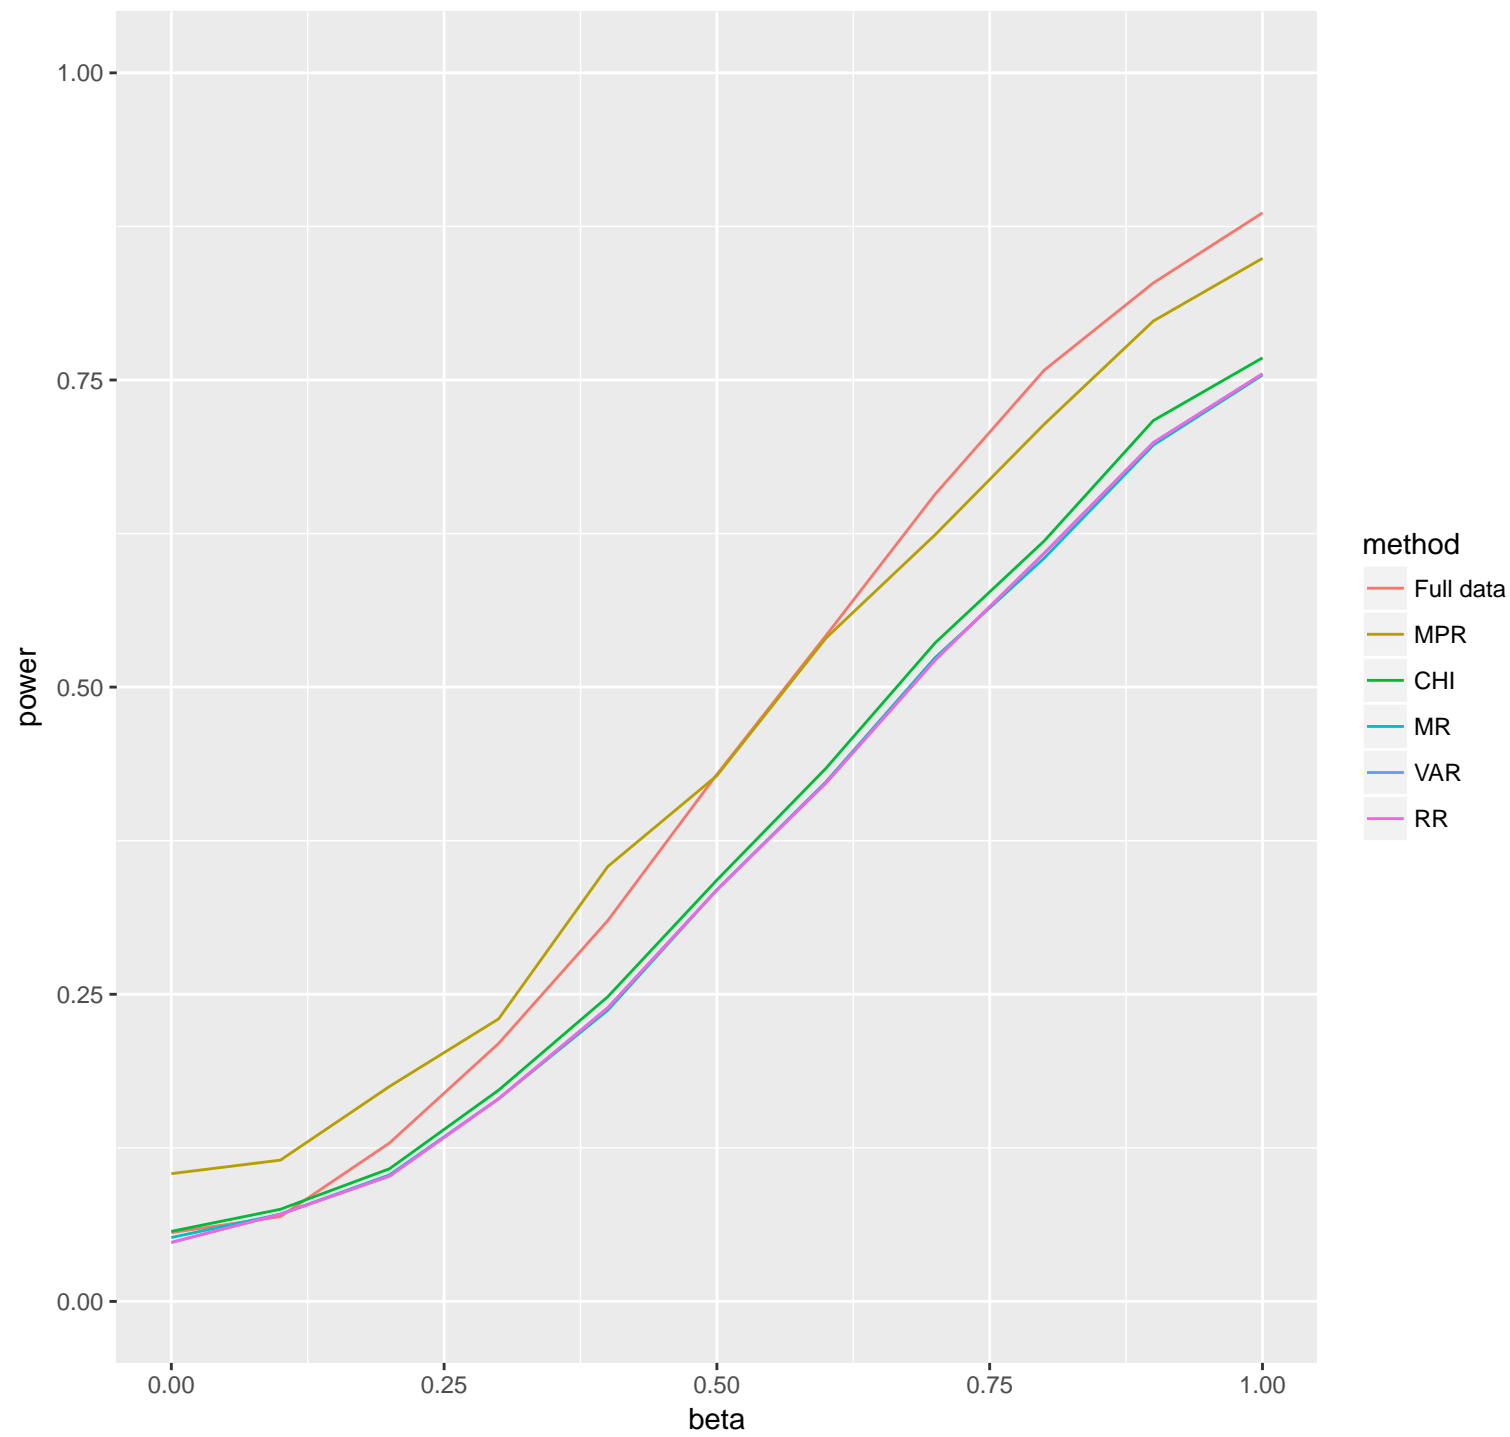

# Power for categorical variable (cor=0.2;0.4% missing)

Outcome included for all pooling methods

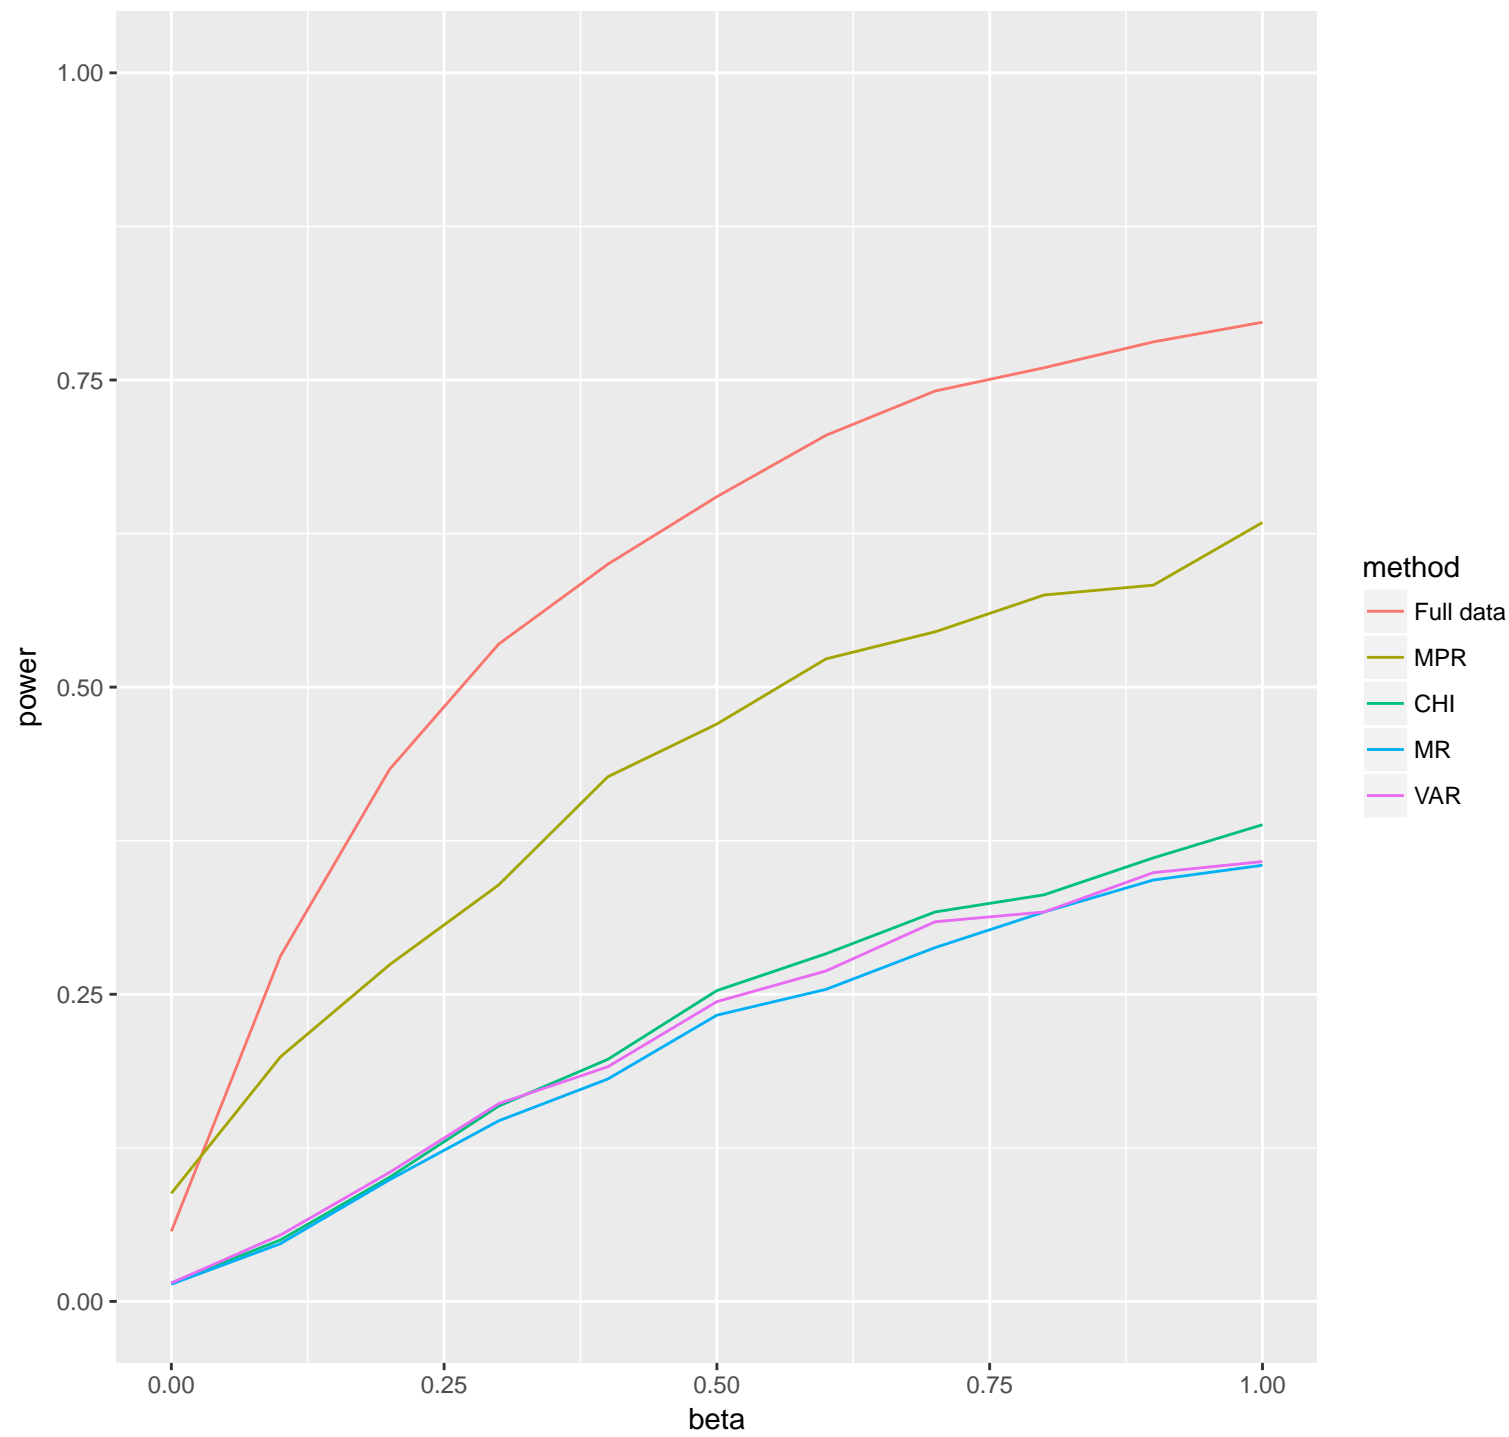

# Power for continuous variable (cor=0.2;0.4% missing)

Outcome included for all pooling methods

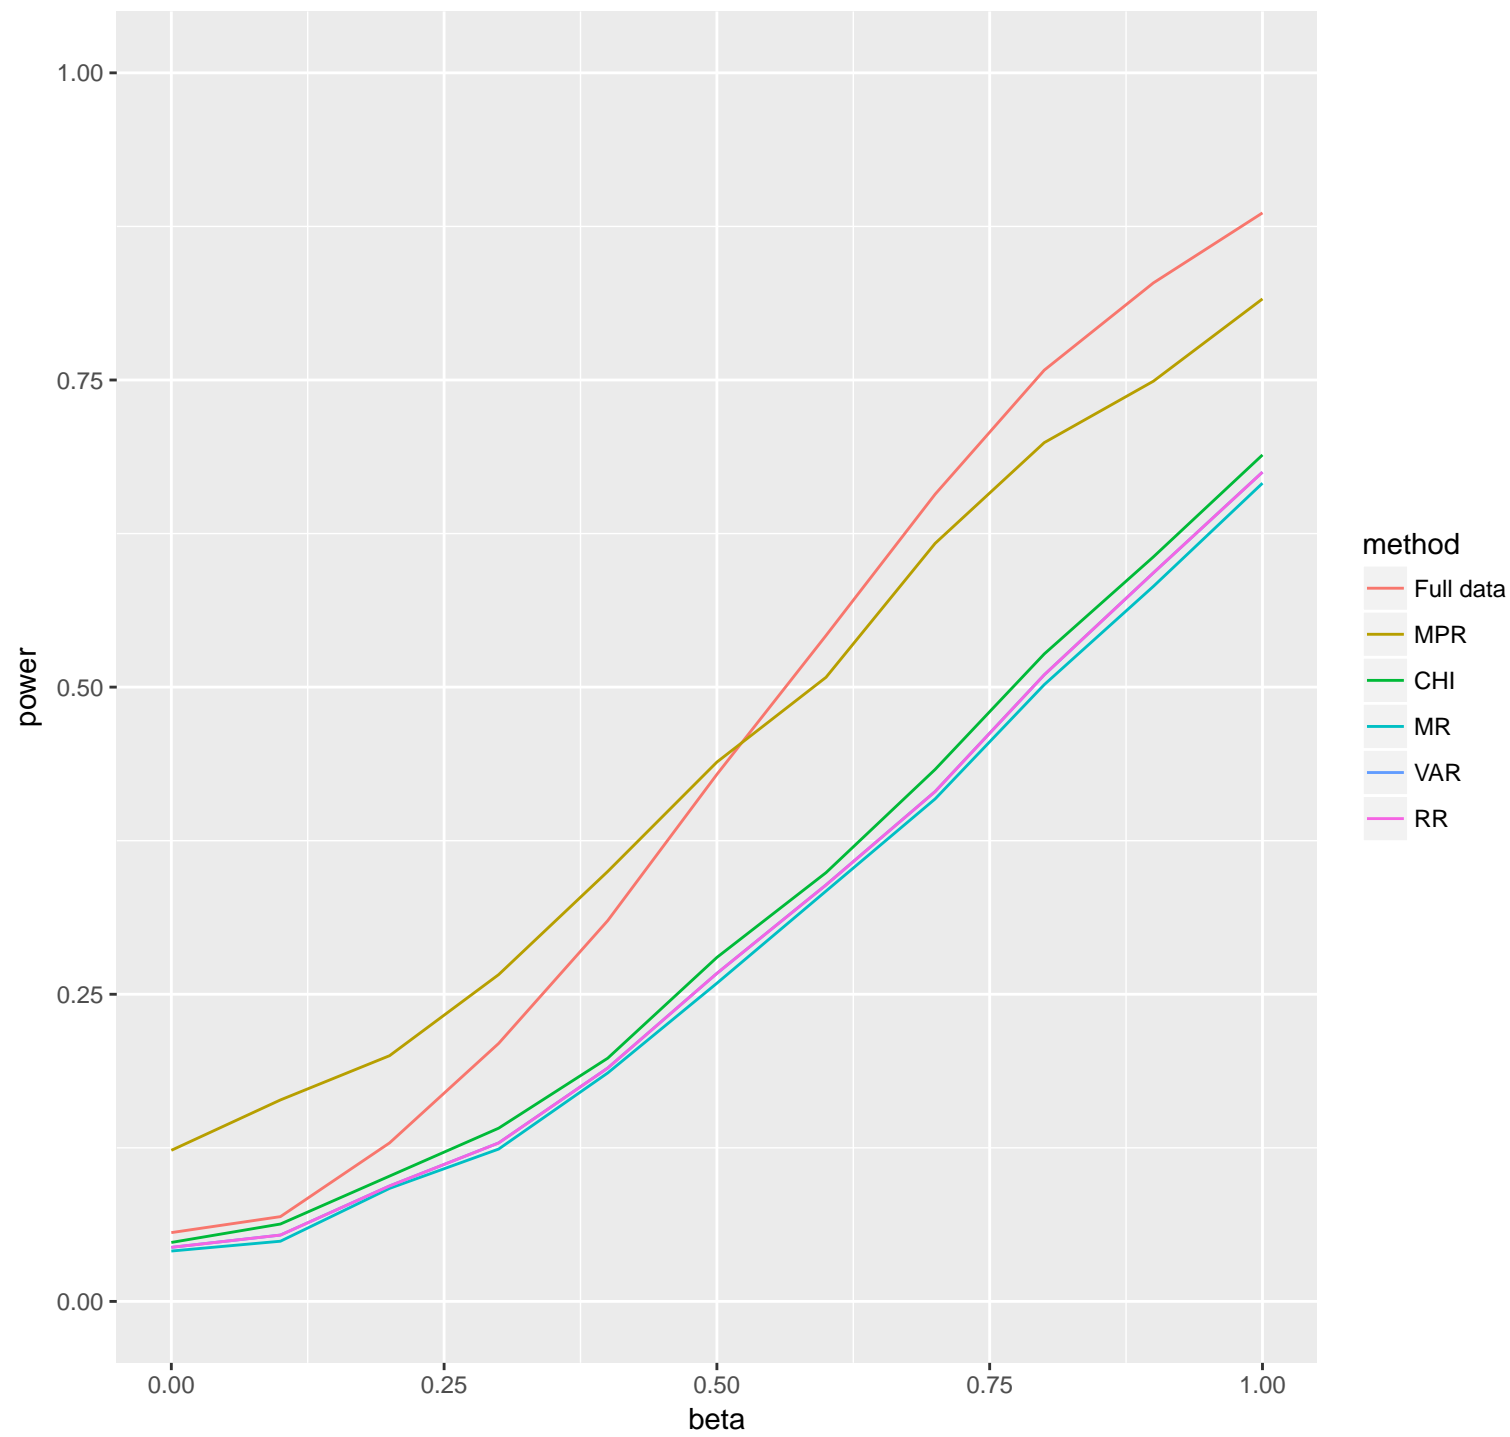



# Power for categorical variable (cor=0.4;0.25% missing)

Outcome included for all pooling methods

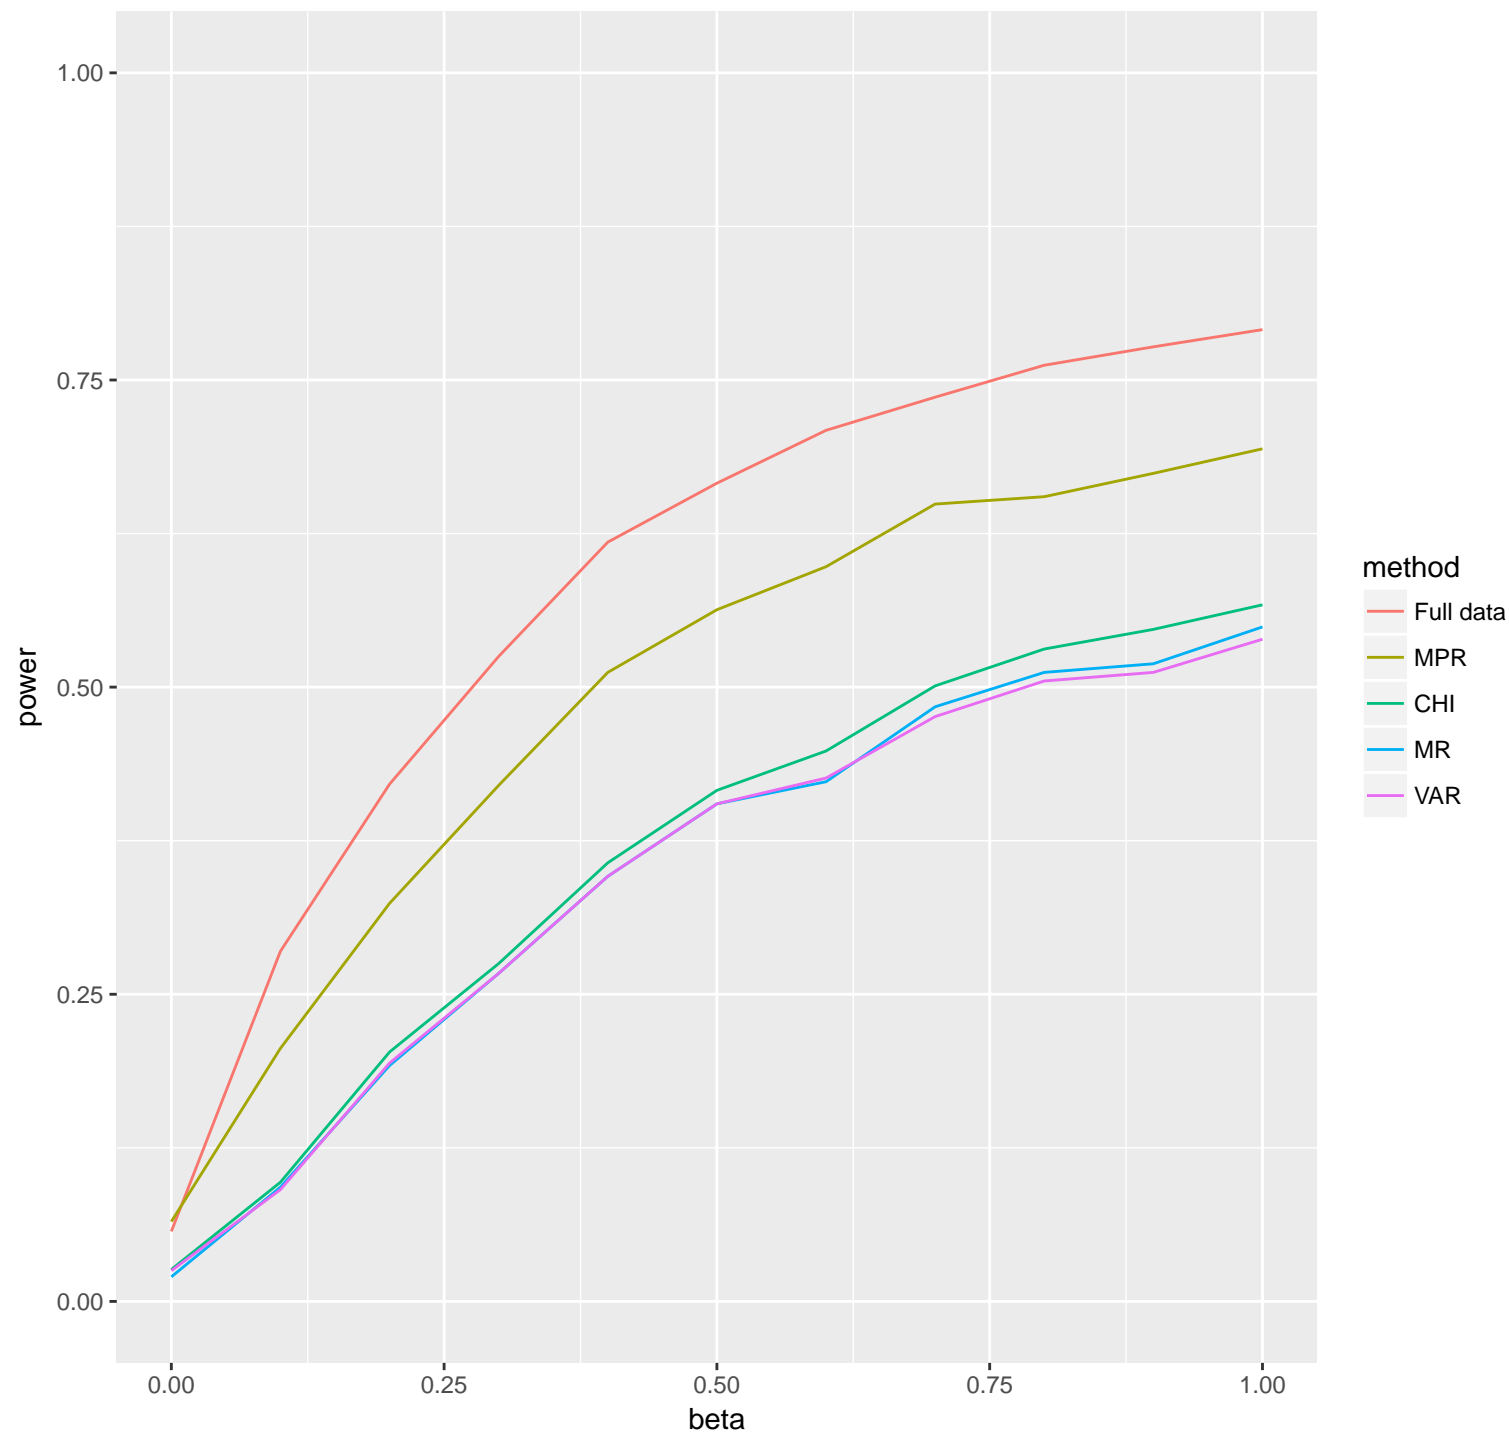

# Power for continuous variable (cor=0.4;0.25% missing)

Outcome included for all pooling methods

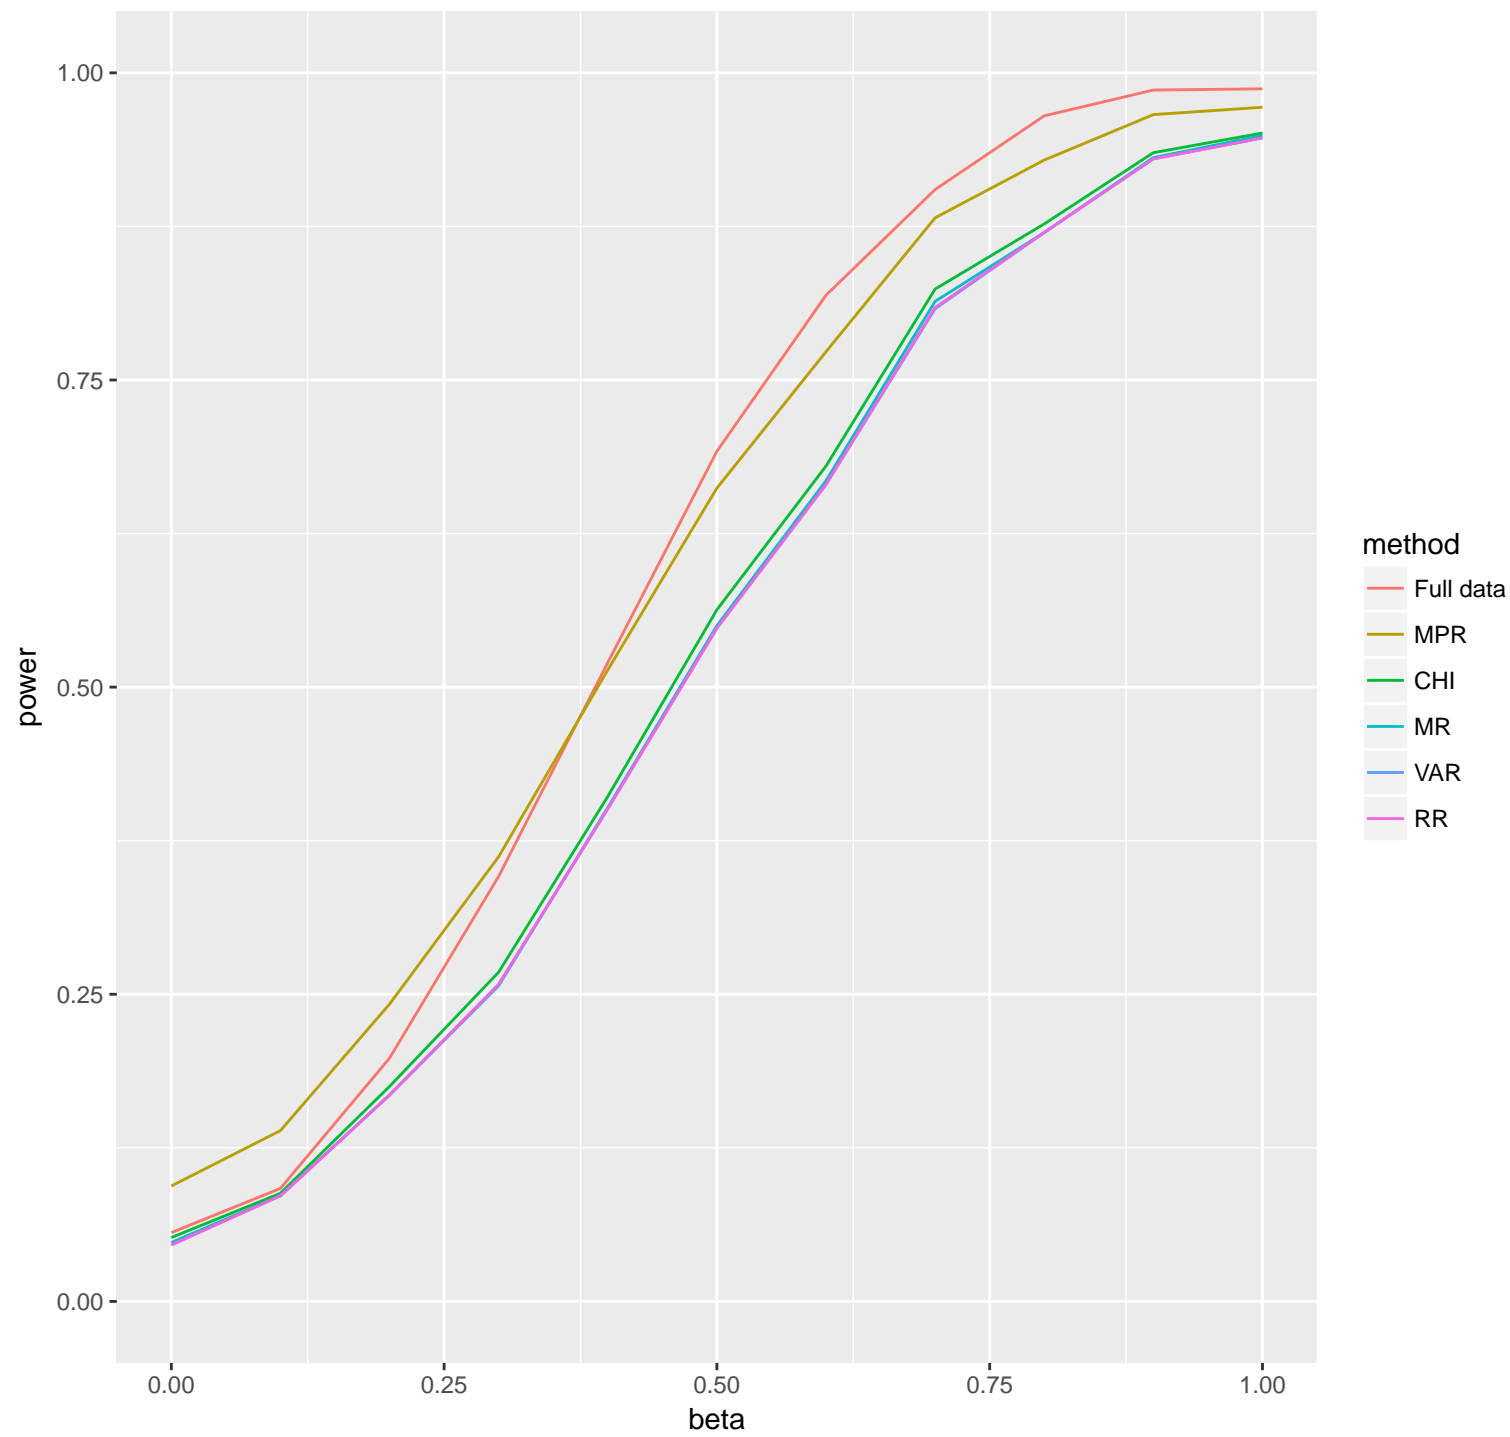

# Power for categorical variable (cor=0.4;0.4% missing)

Outcome included for all pooling methods

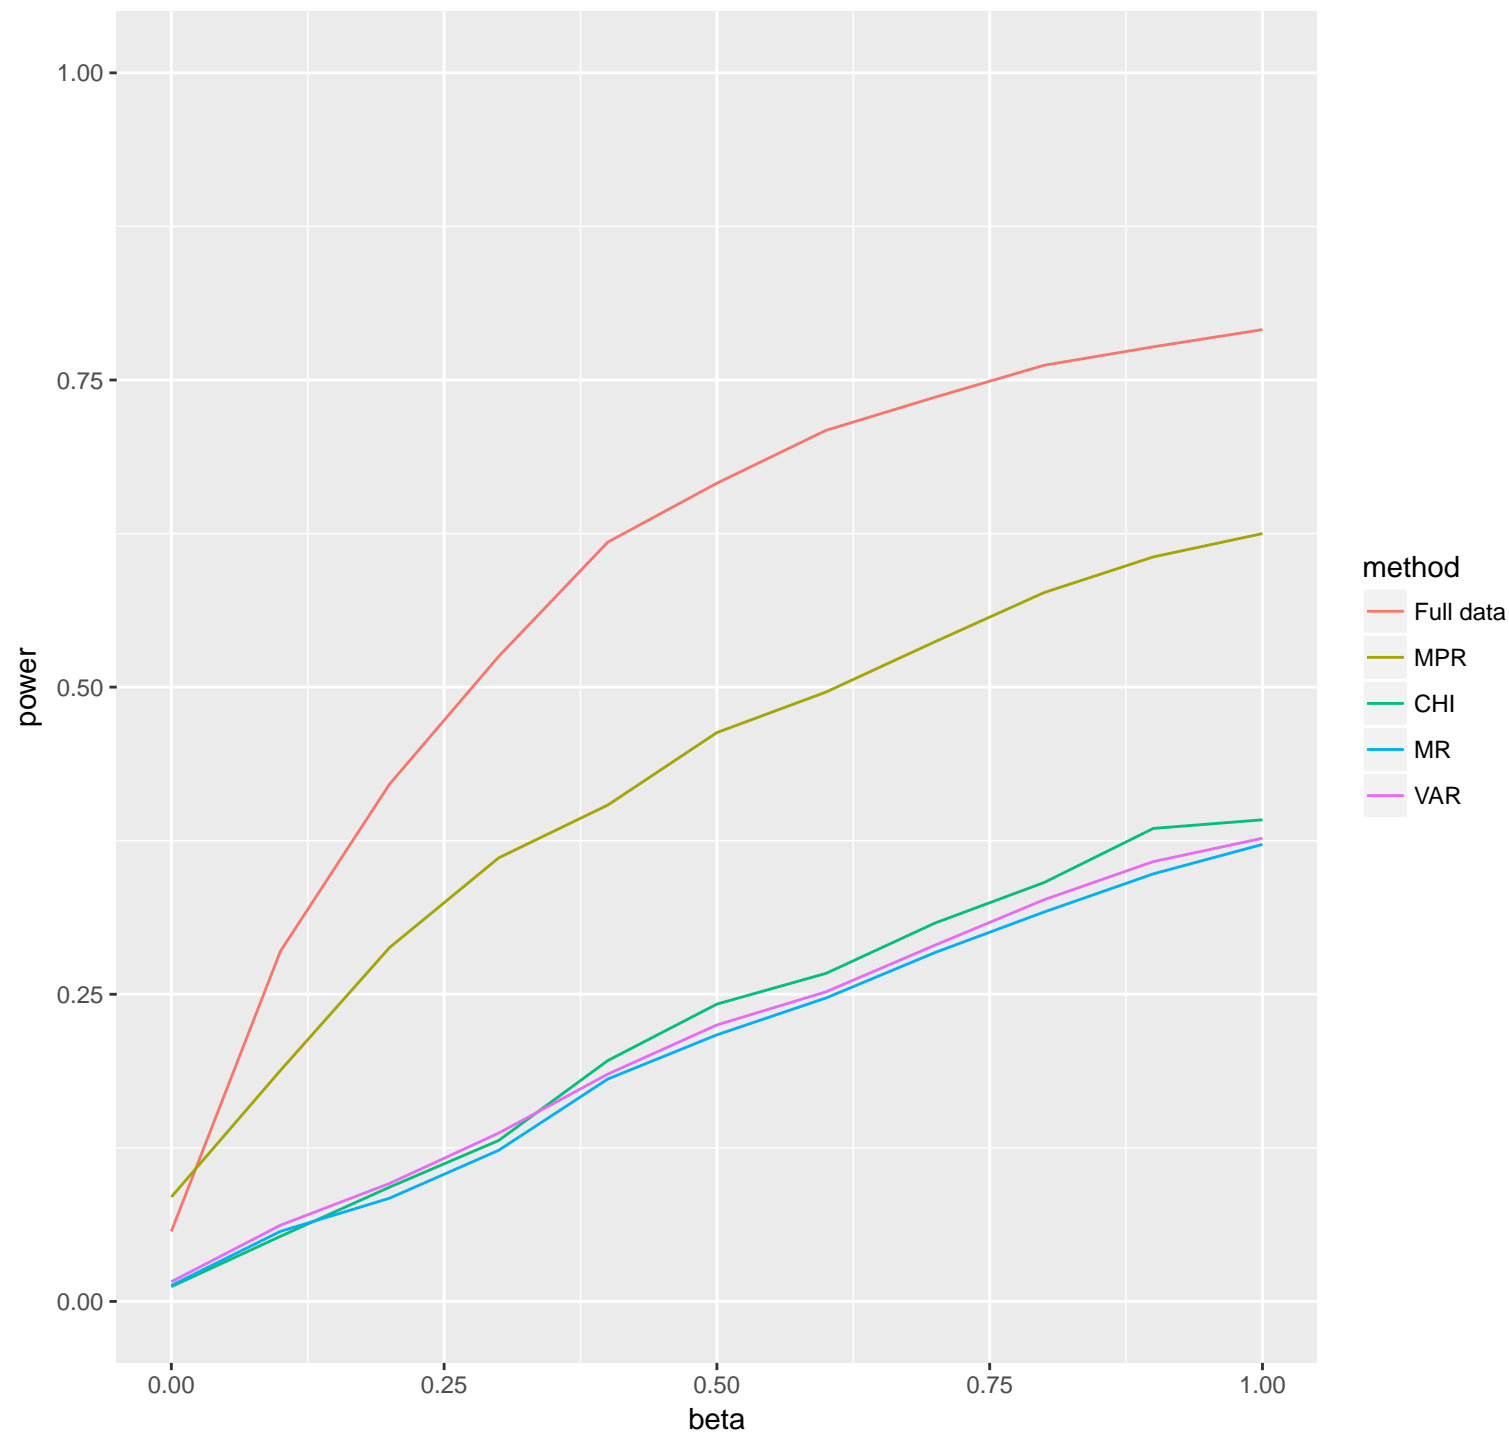

# Power for continuous variable (cor=0.4;0.4% missing)

Outcome included for all pooling methods

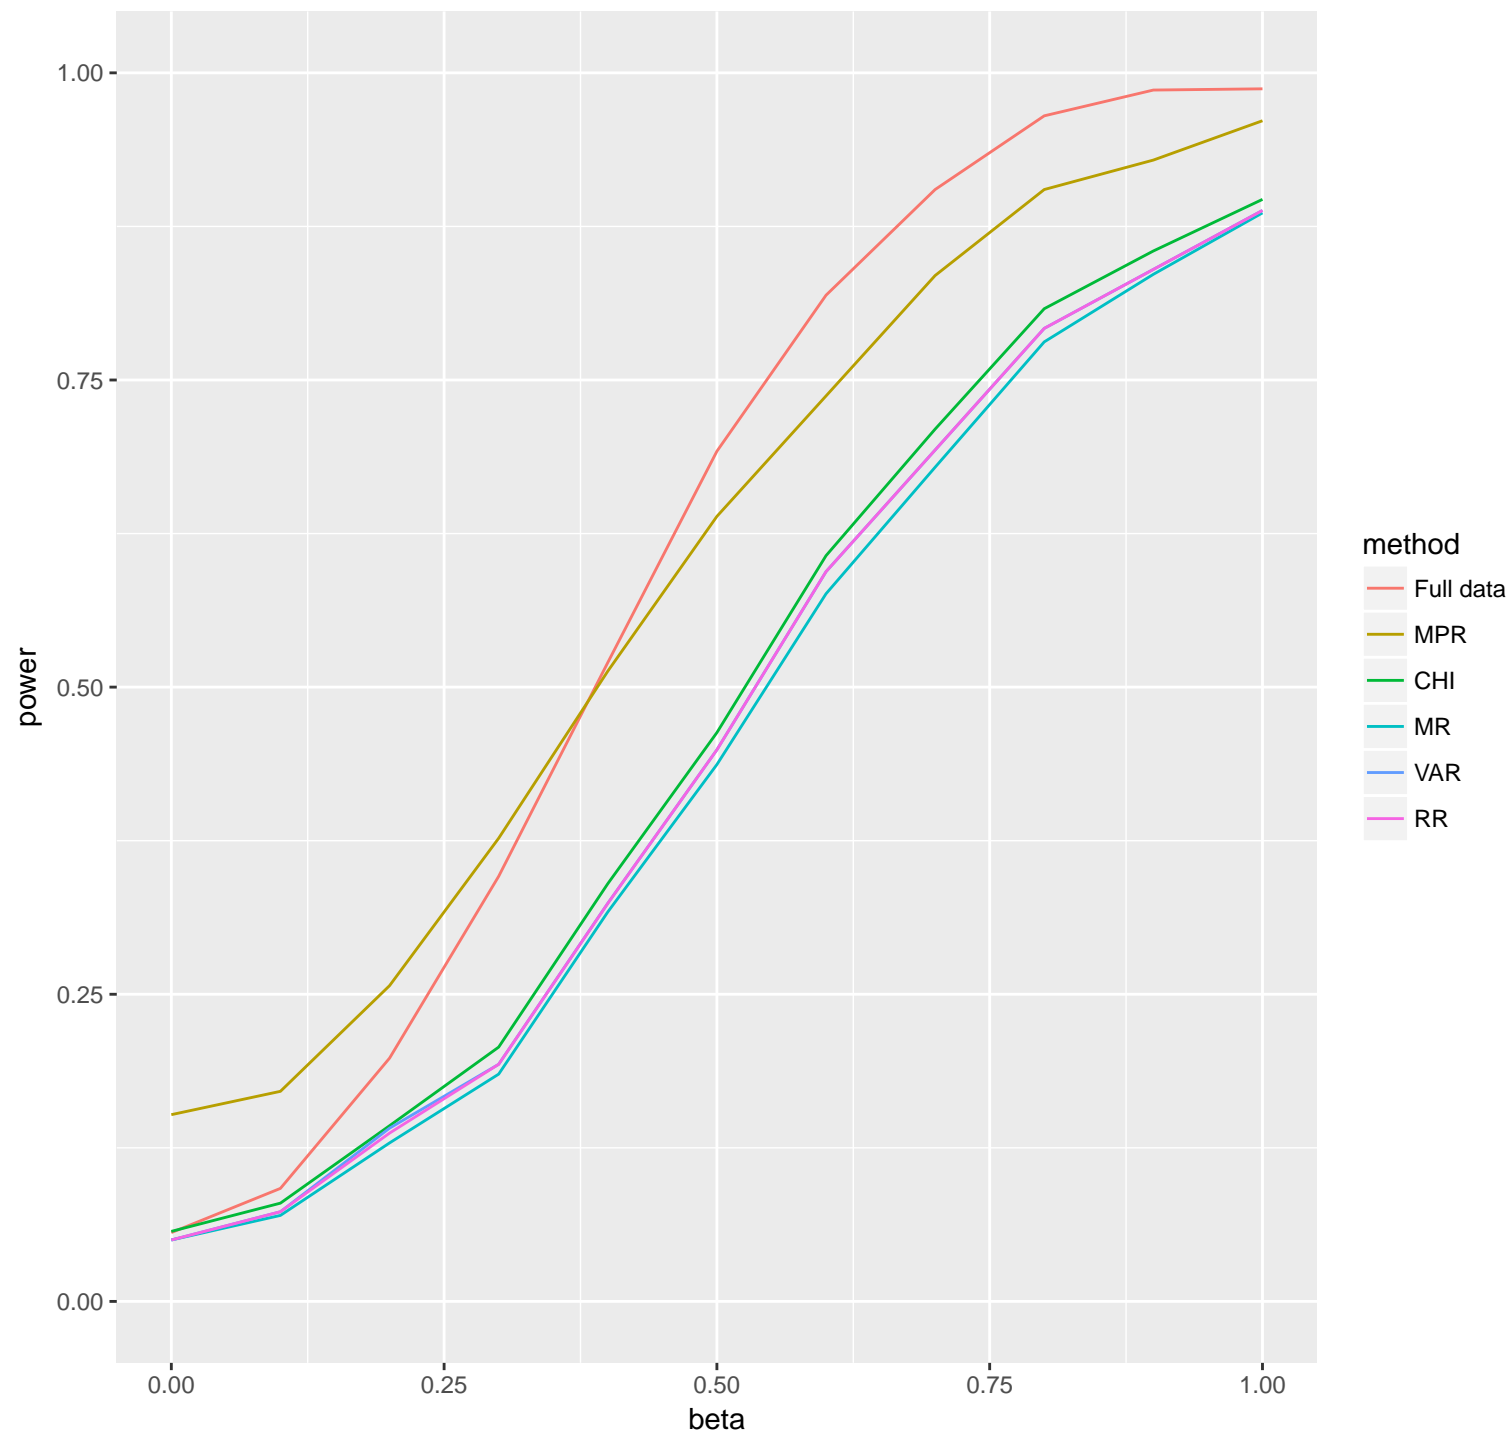

# Power for categorical variable (cor=0.6;0.25% missing)

Outcome included for all pooling methods

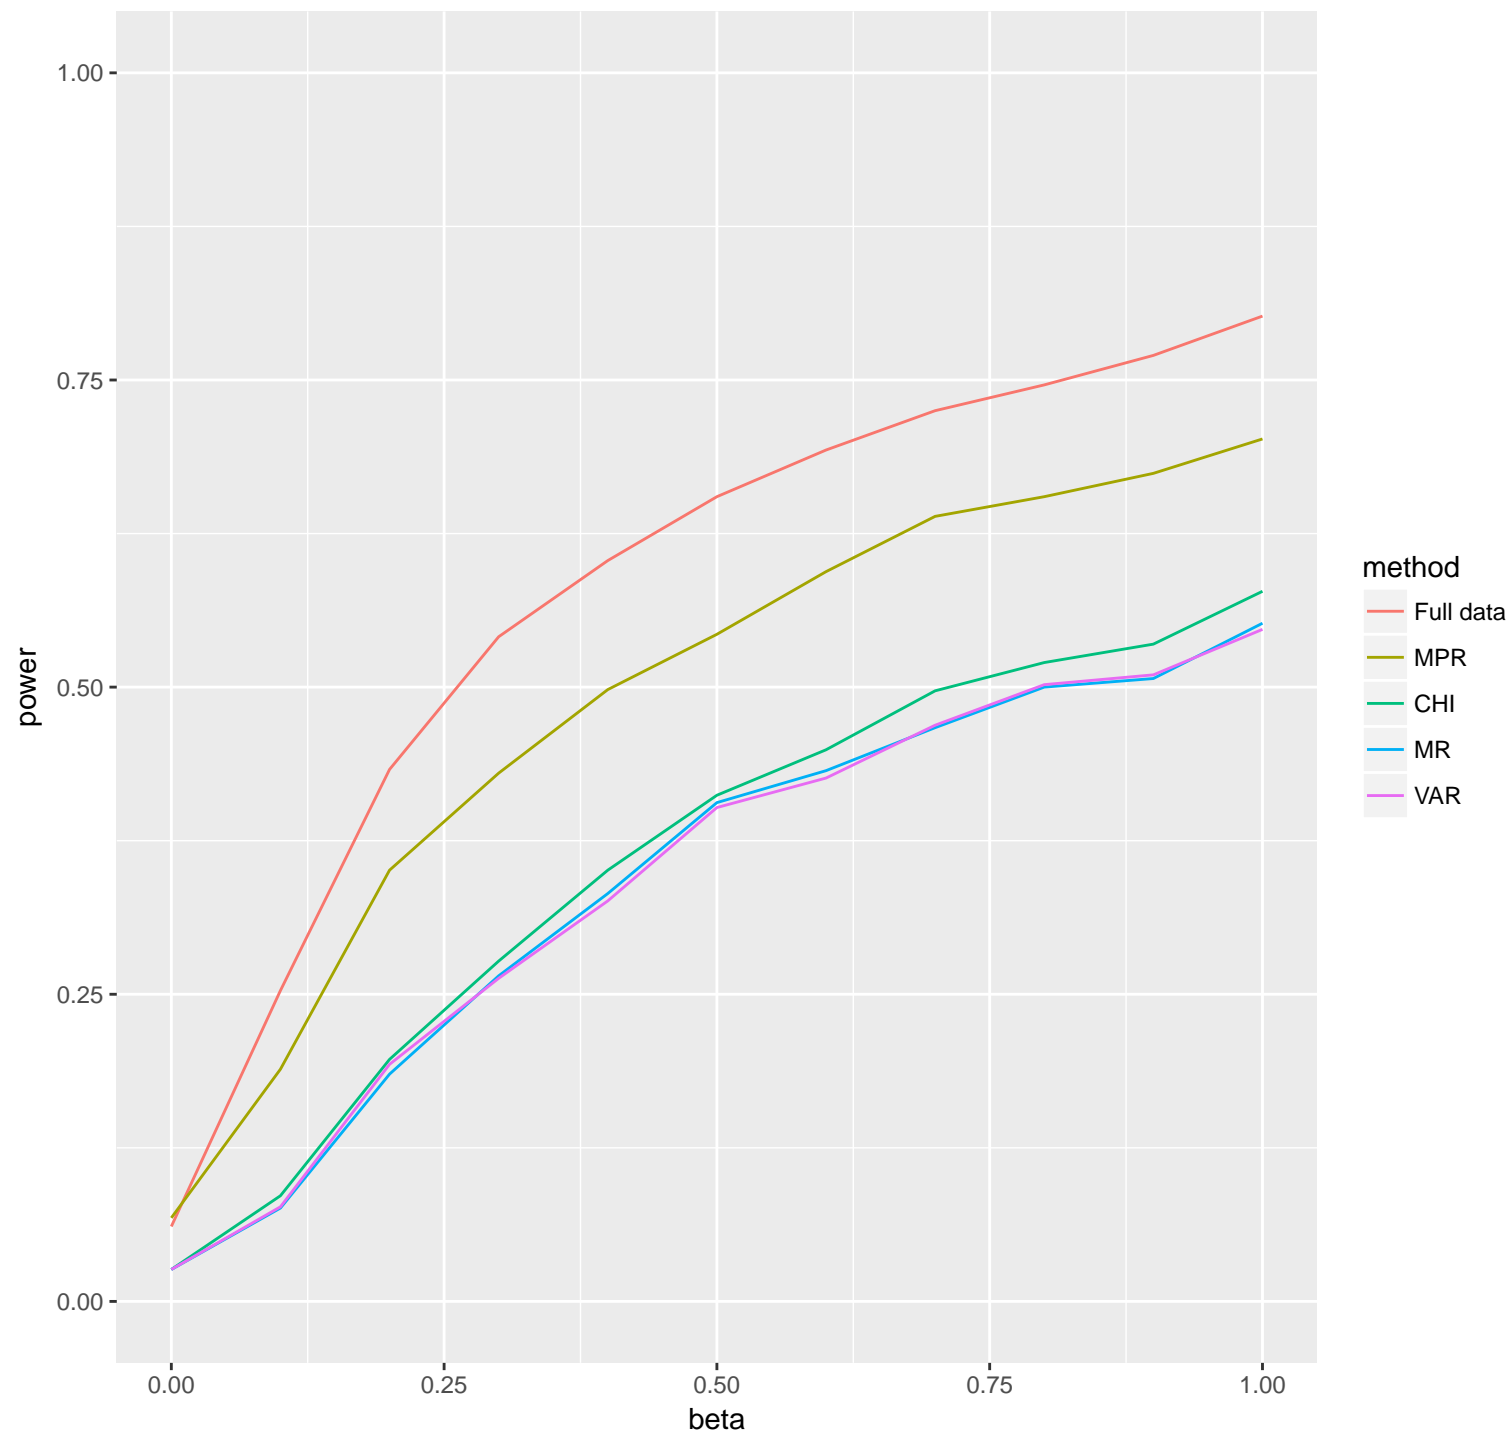

# Power for continuous variable (cor=0.6;0.25% missing)

Outcome included for all pooling methods

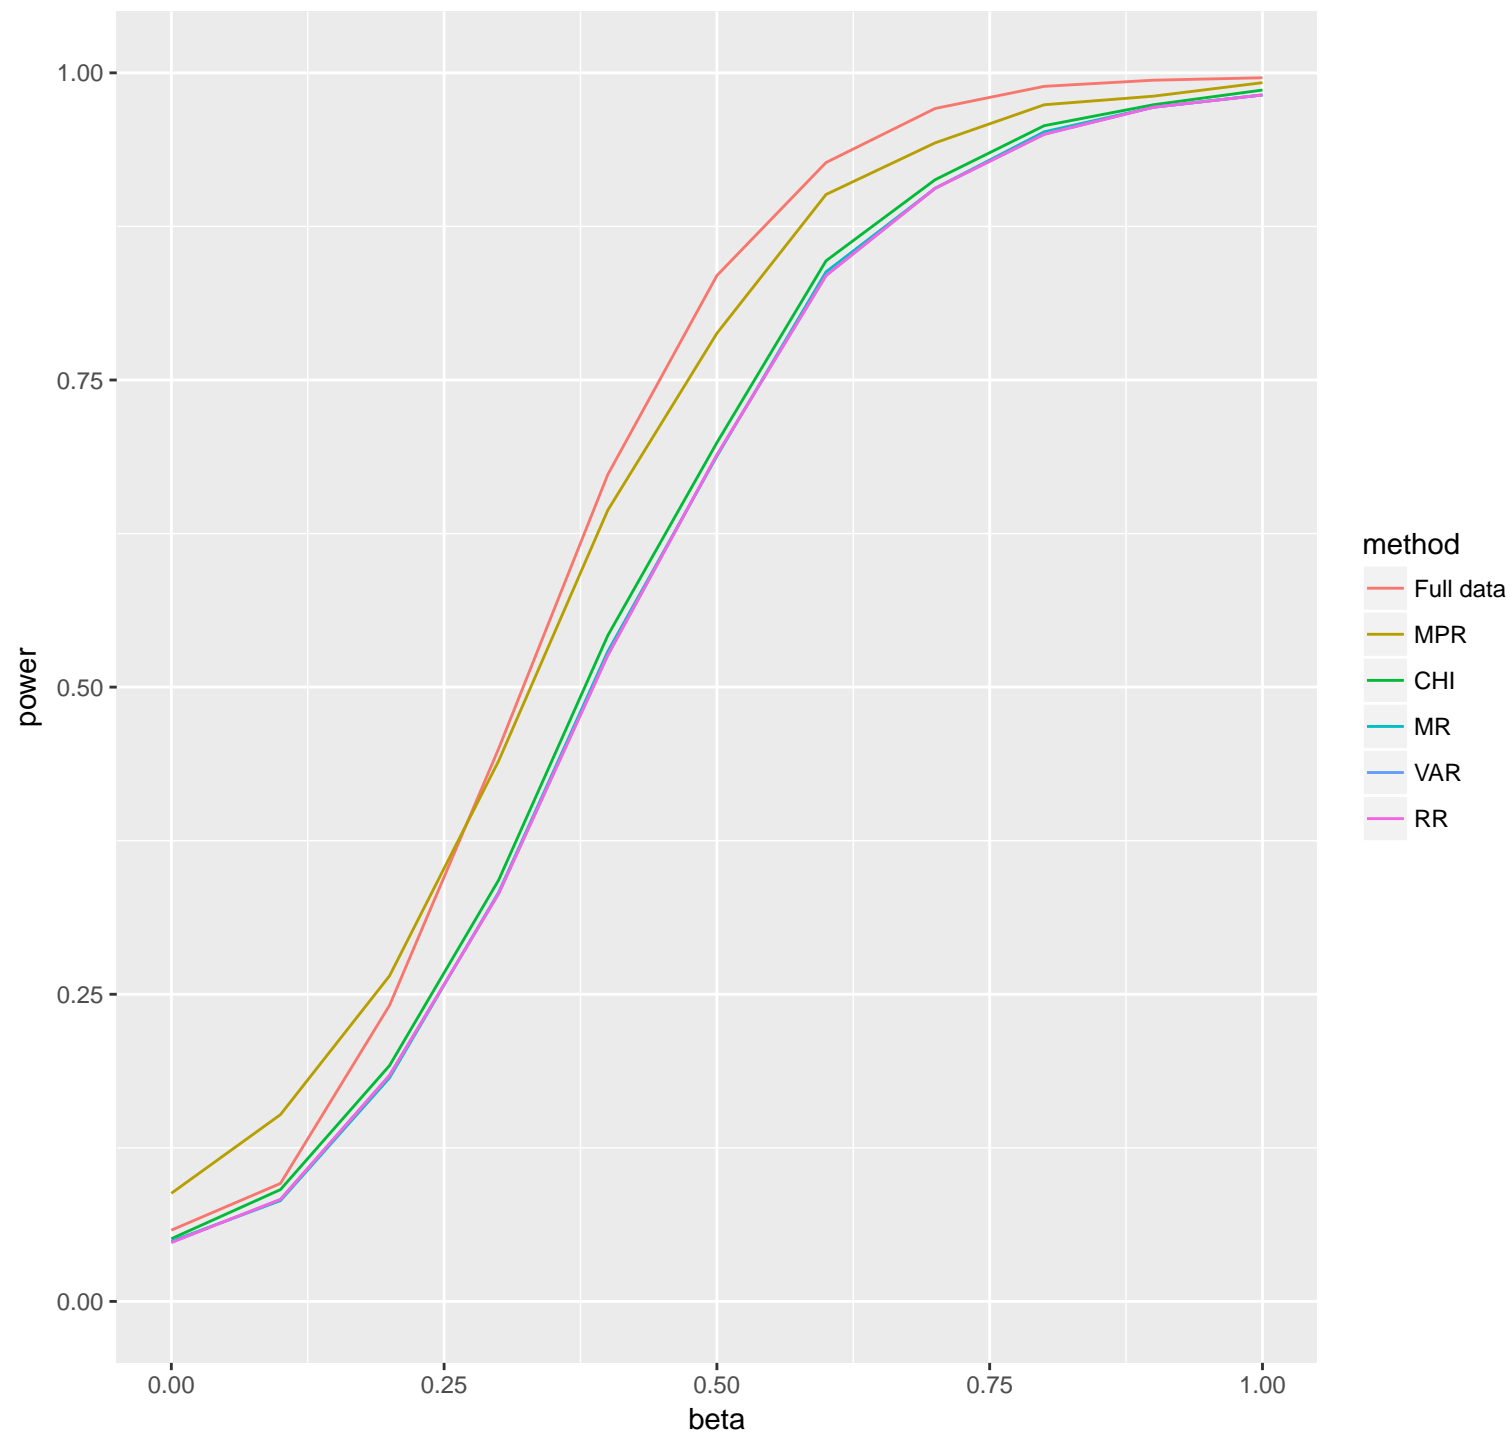

# Power for categorical variable (cor=0.6;0.4% missing)

Outcome included for all pooling methods

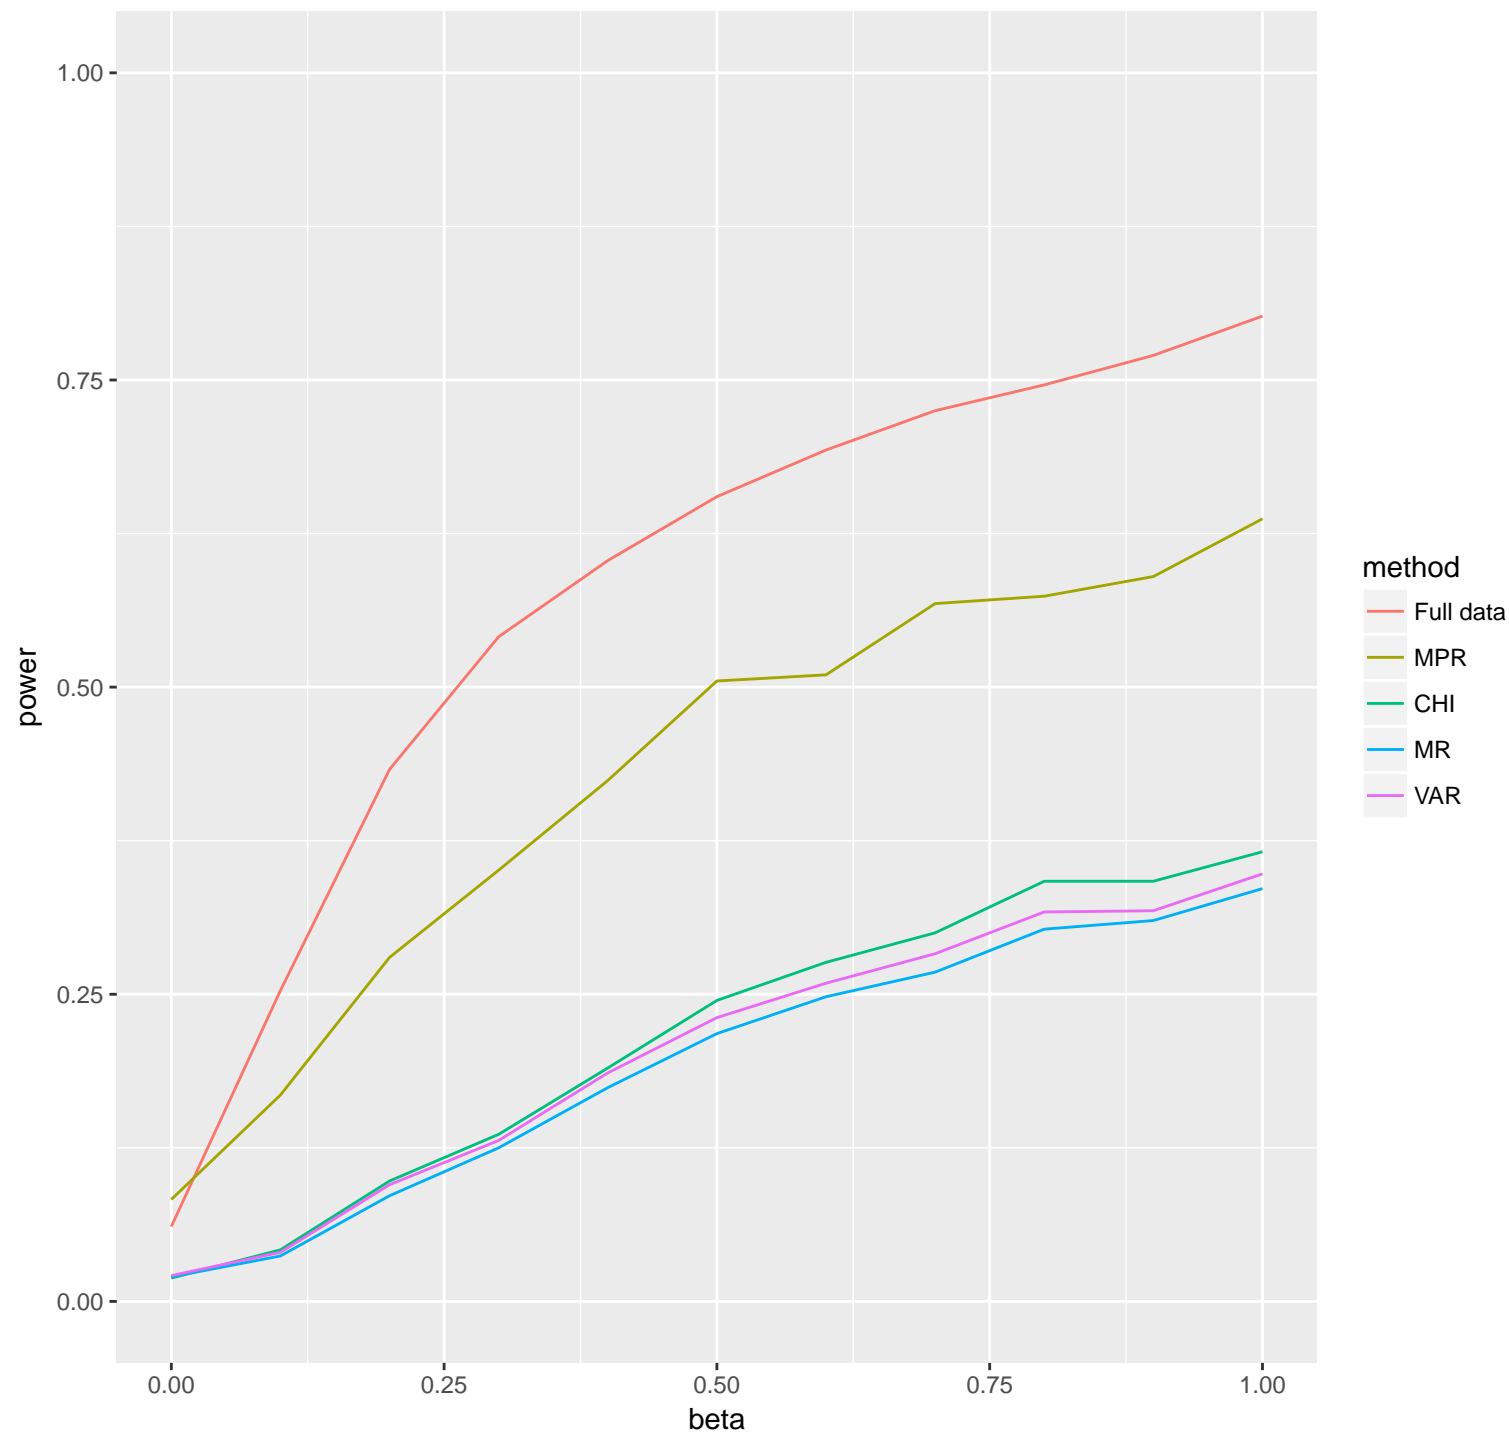

# Power for continuous variable (cor=0.6;0.4% missing)

Outcome included for all pooling methods

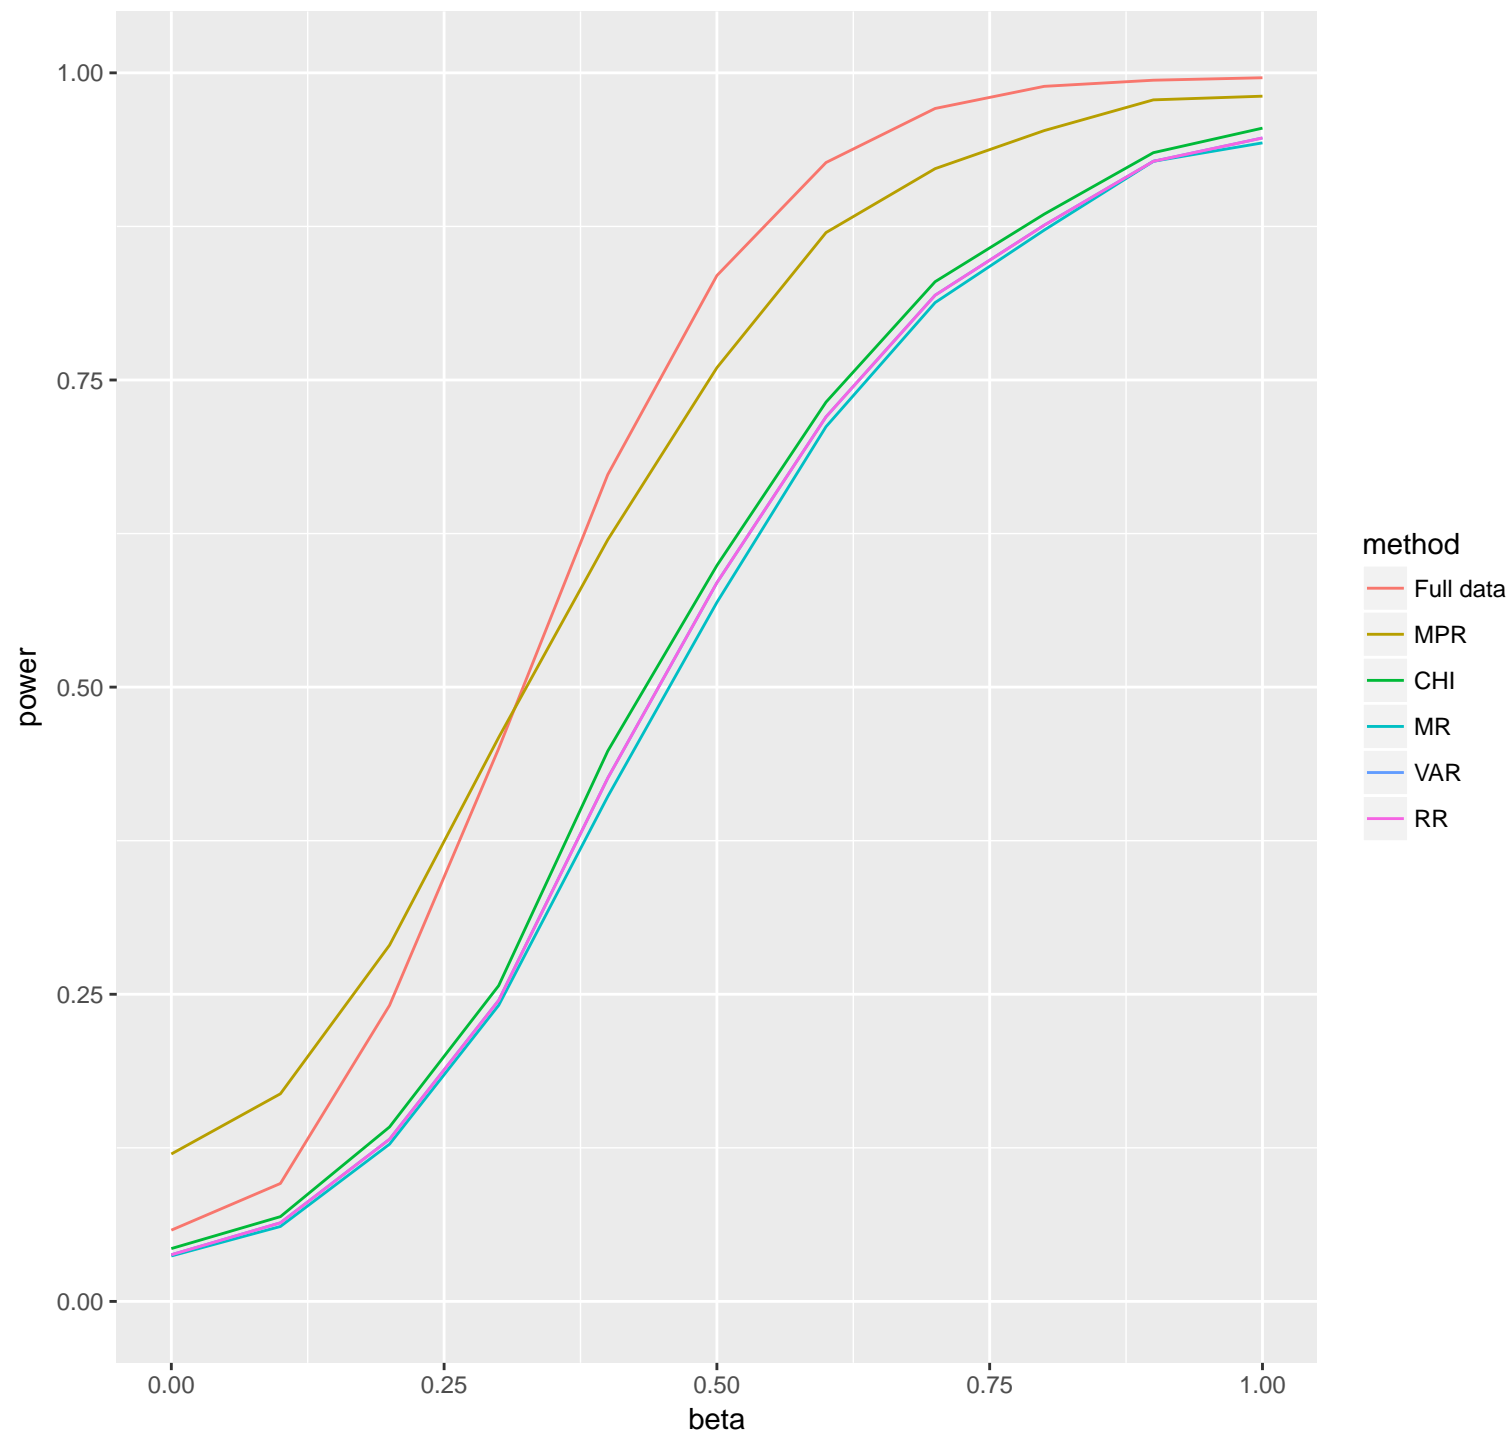



# Power for categorical variable (cor=0.8;0.25% missing)

Outcome included for all pooling methods

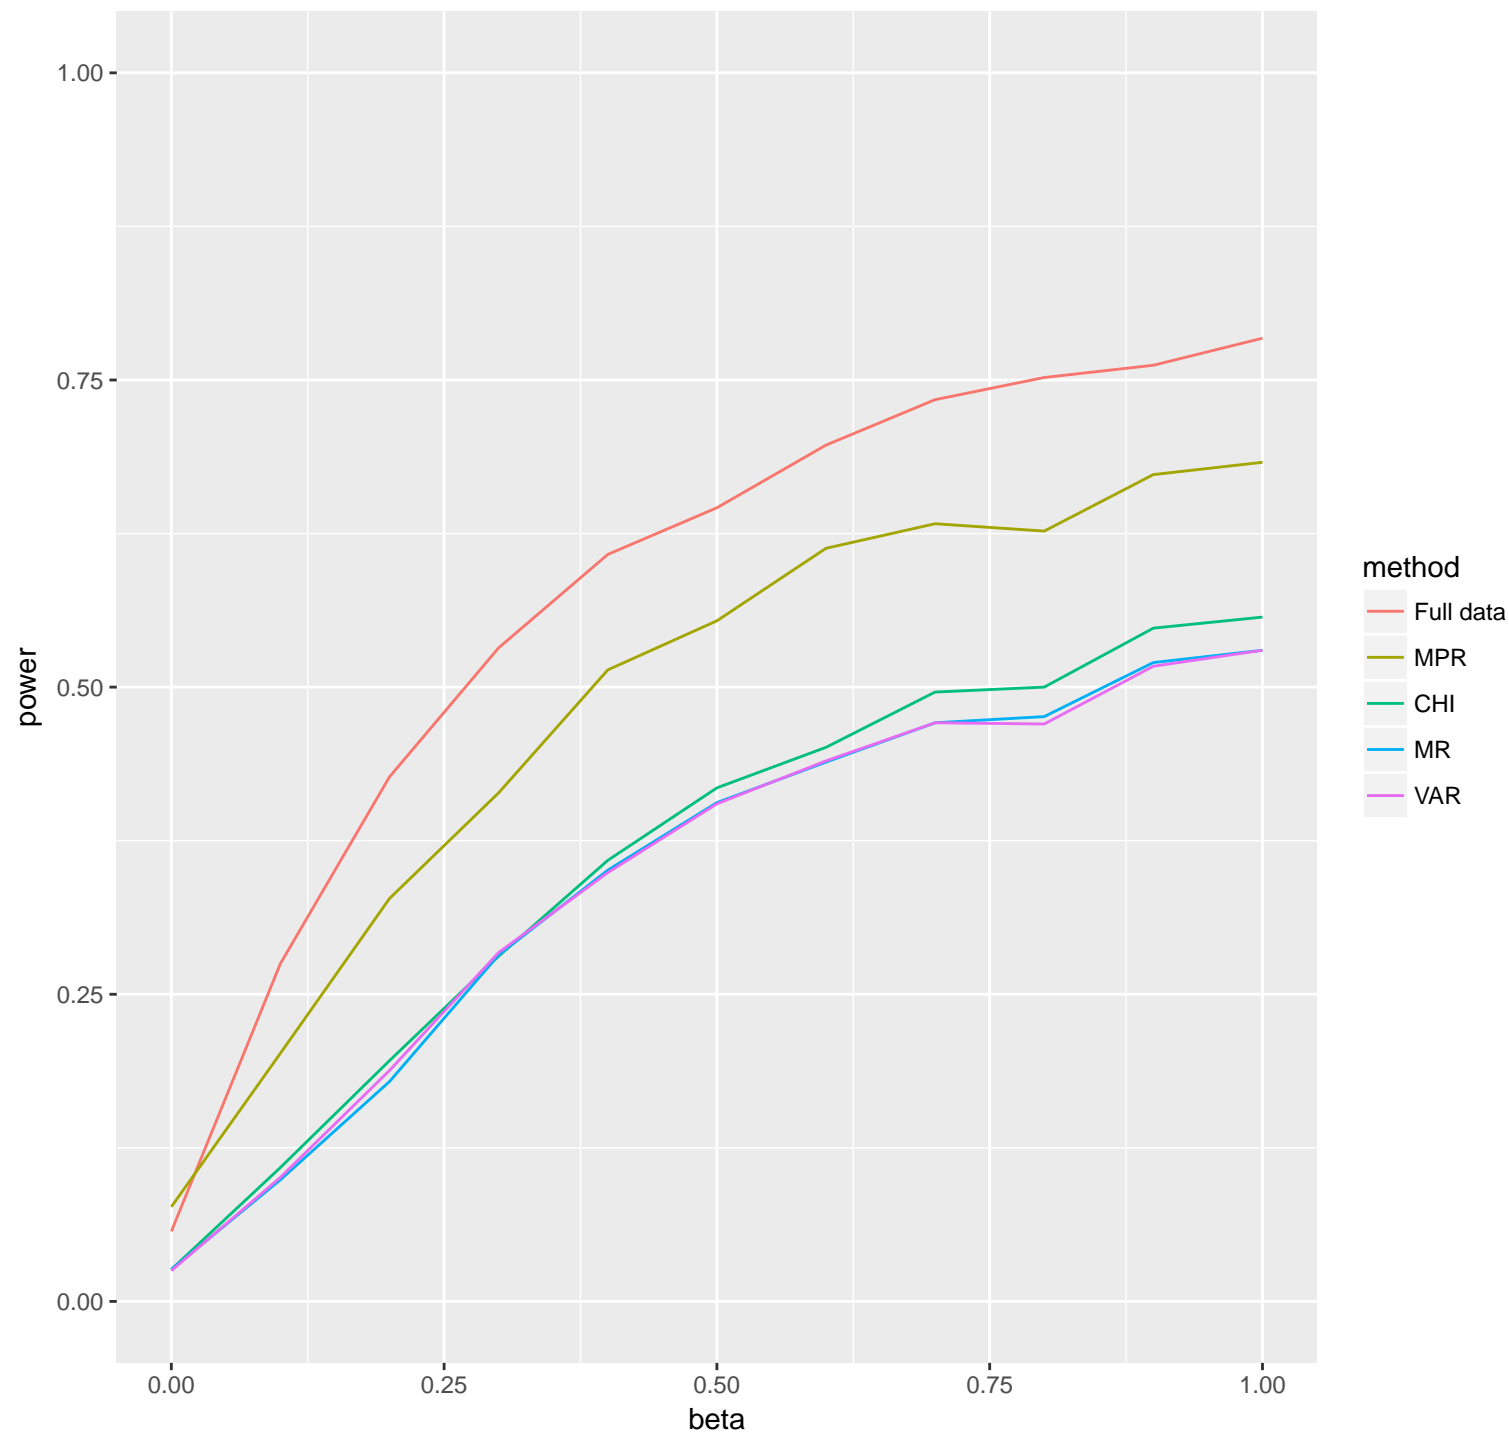



# Power for categorical variable (cor=0.8;0.4% missing)

Outcome included for all pooling methods

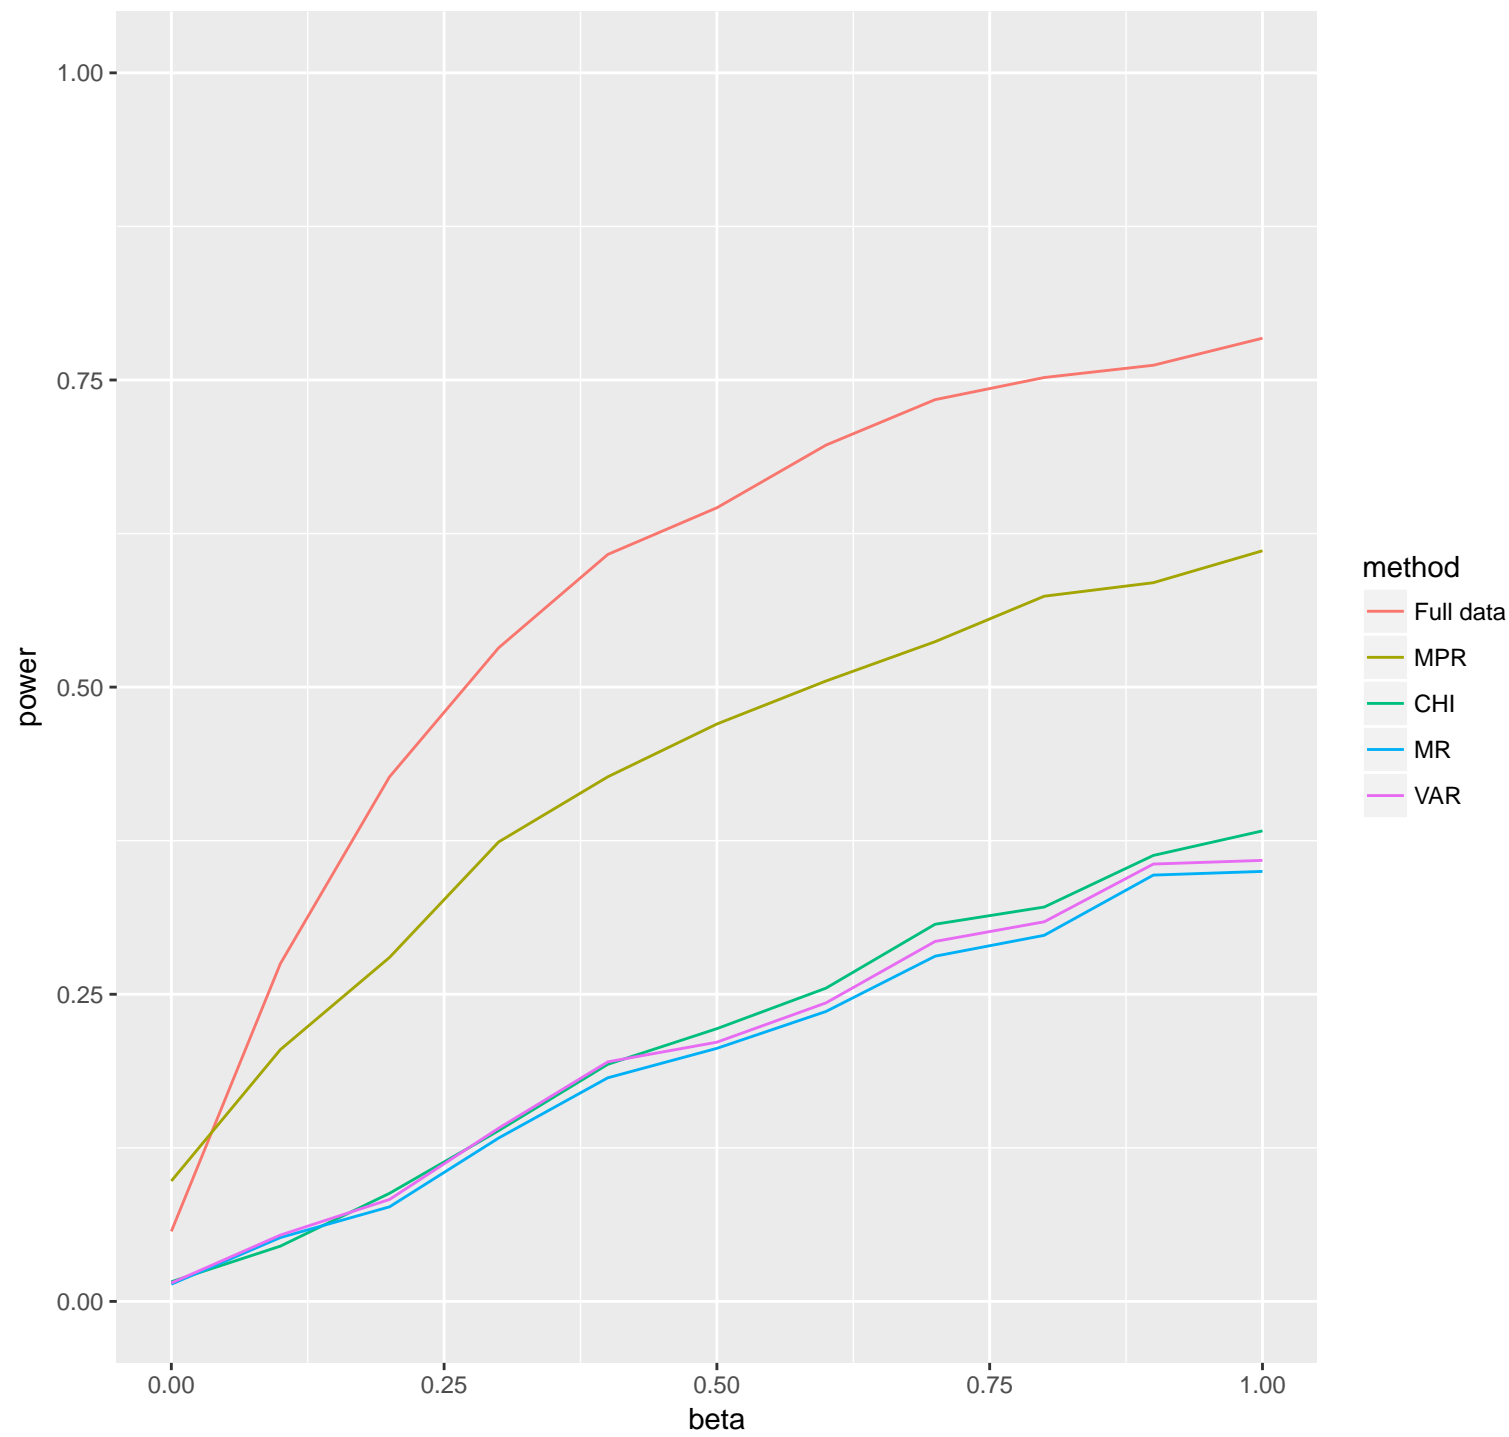

# Power for continuous variable (cor=0.8;0.4% missing)

Outcome included for all pooling methods

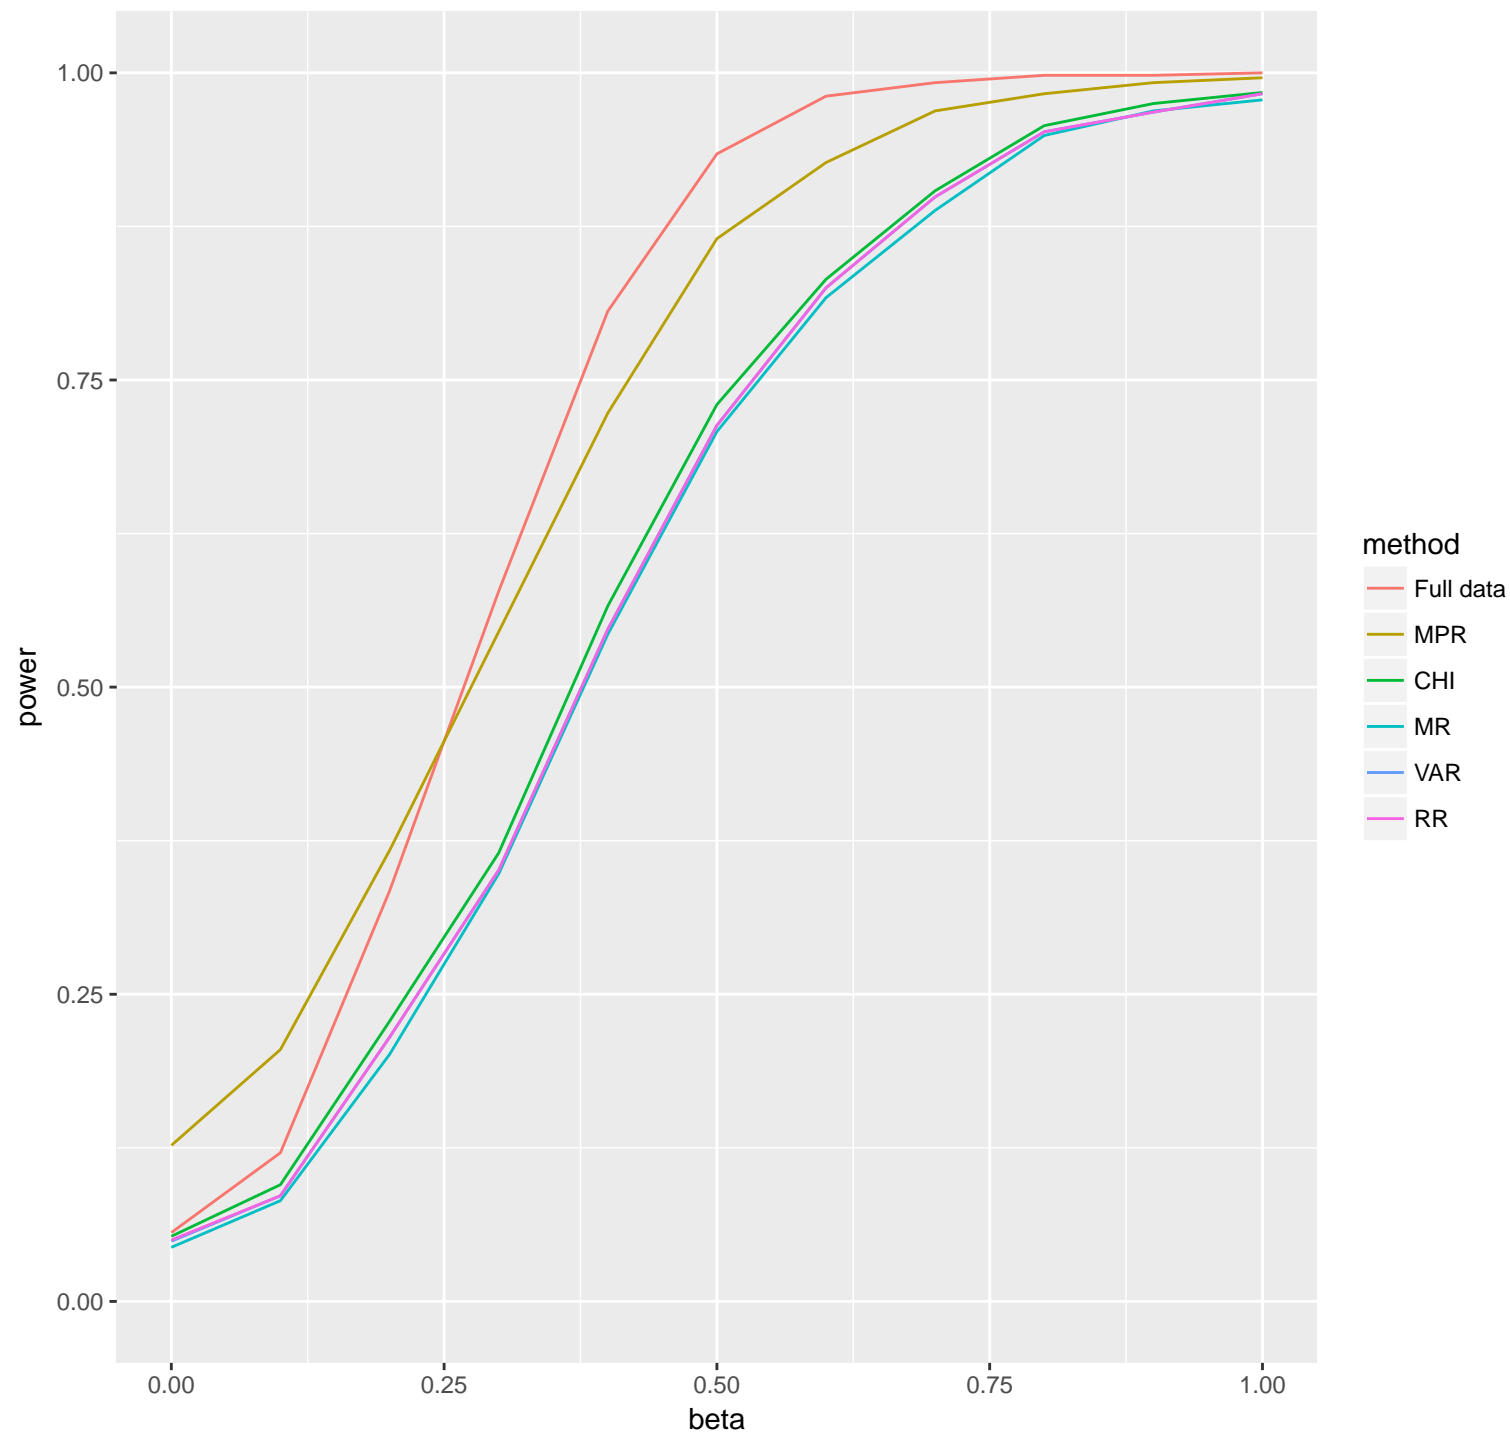

# Power for categorical variable (cor=0.2;0.25% missing)

Outcome excluded for all pooling methods

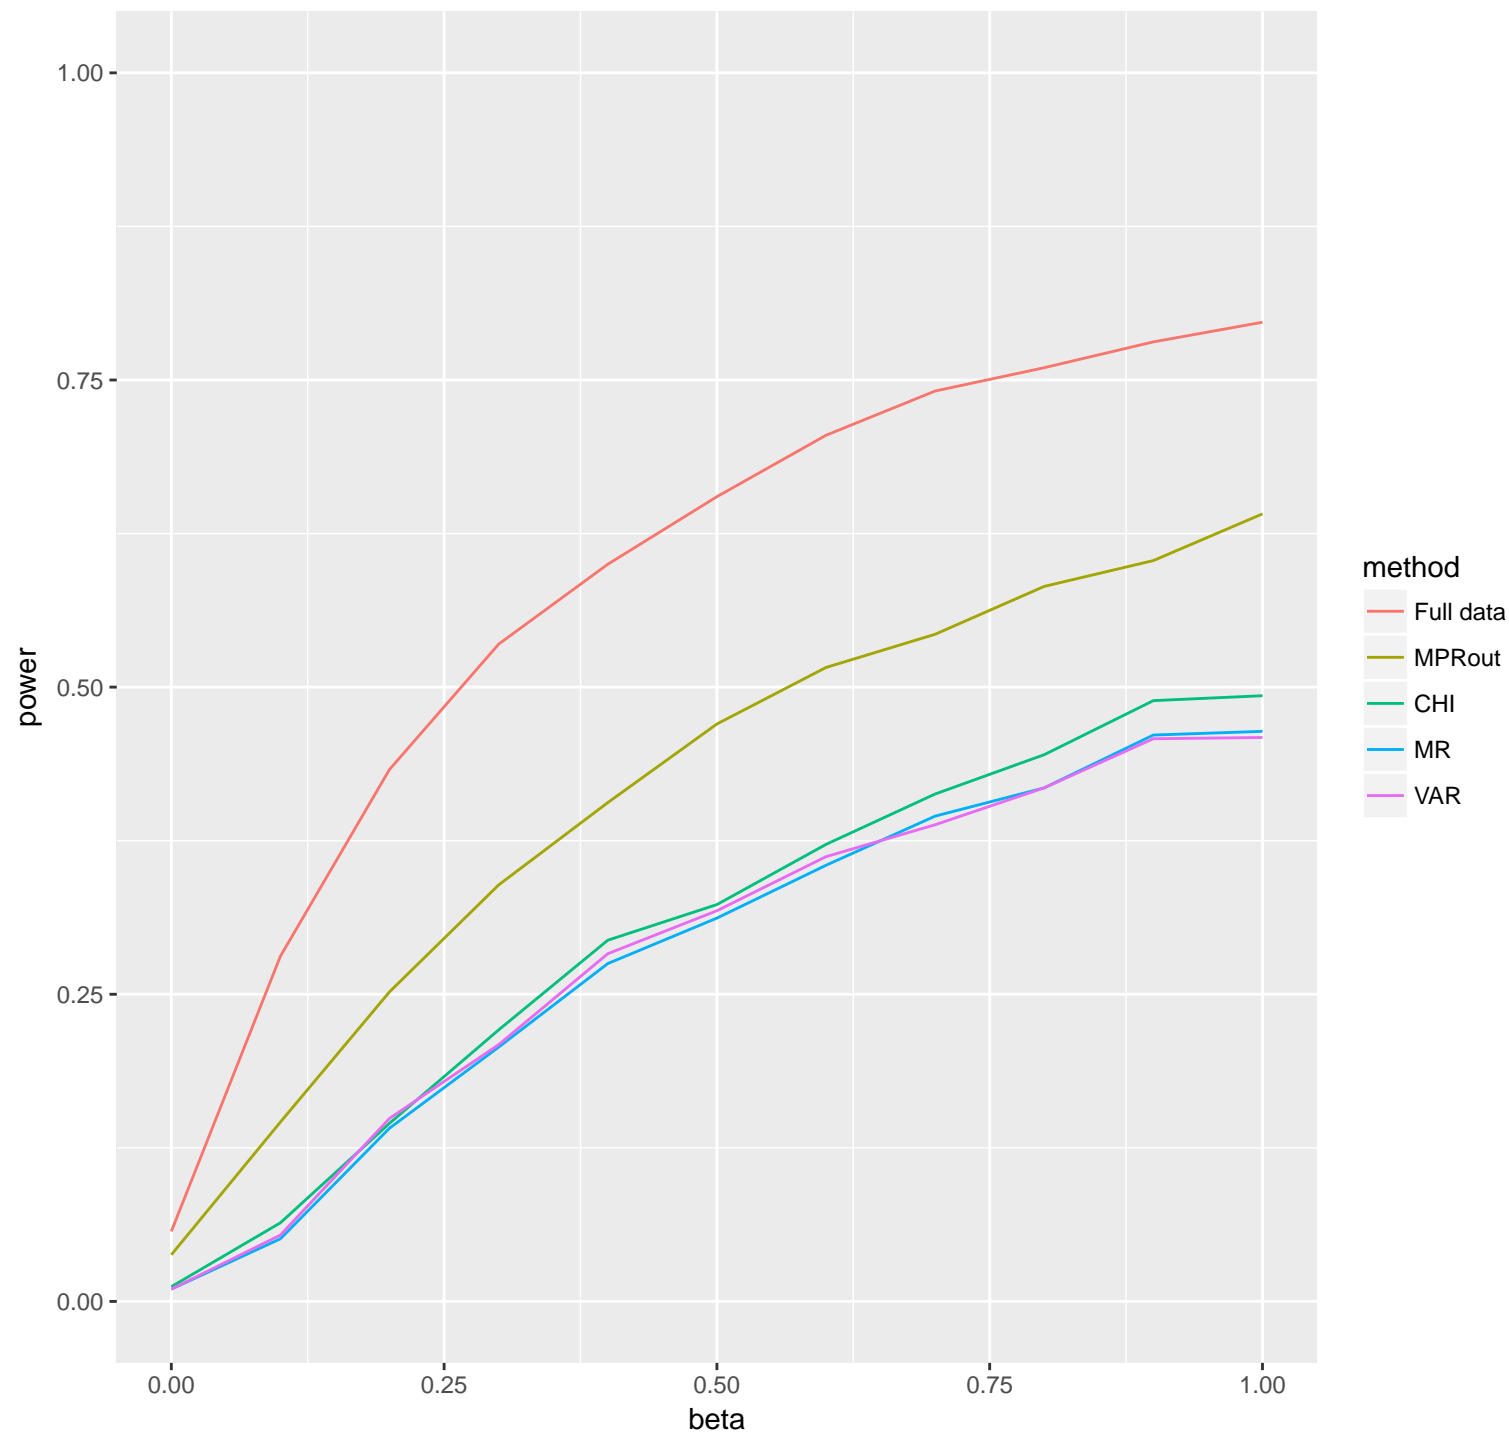

# Power for continuous variable (cor=0.2;0.25% missing)

Outcome excluded for all pooling methods

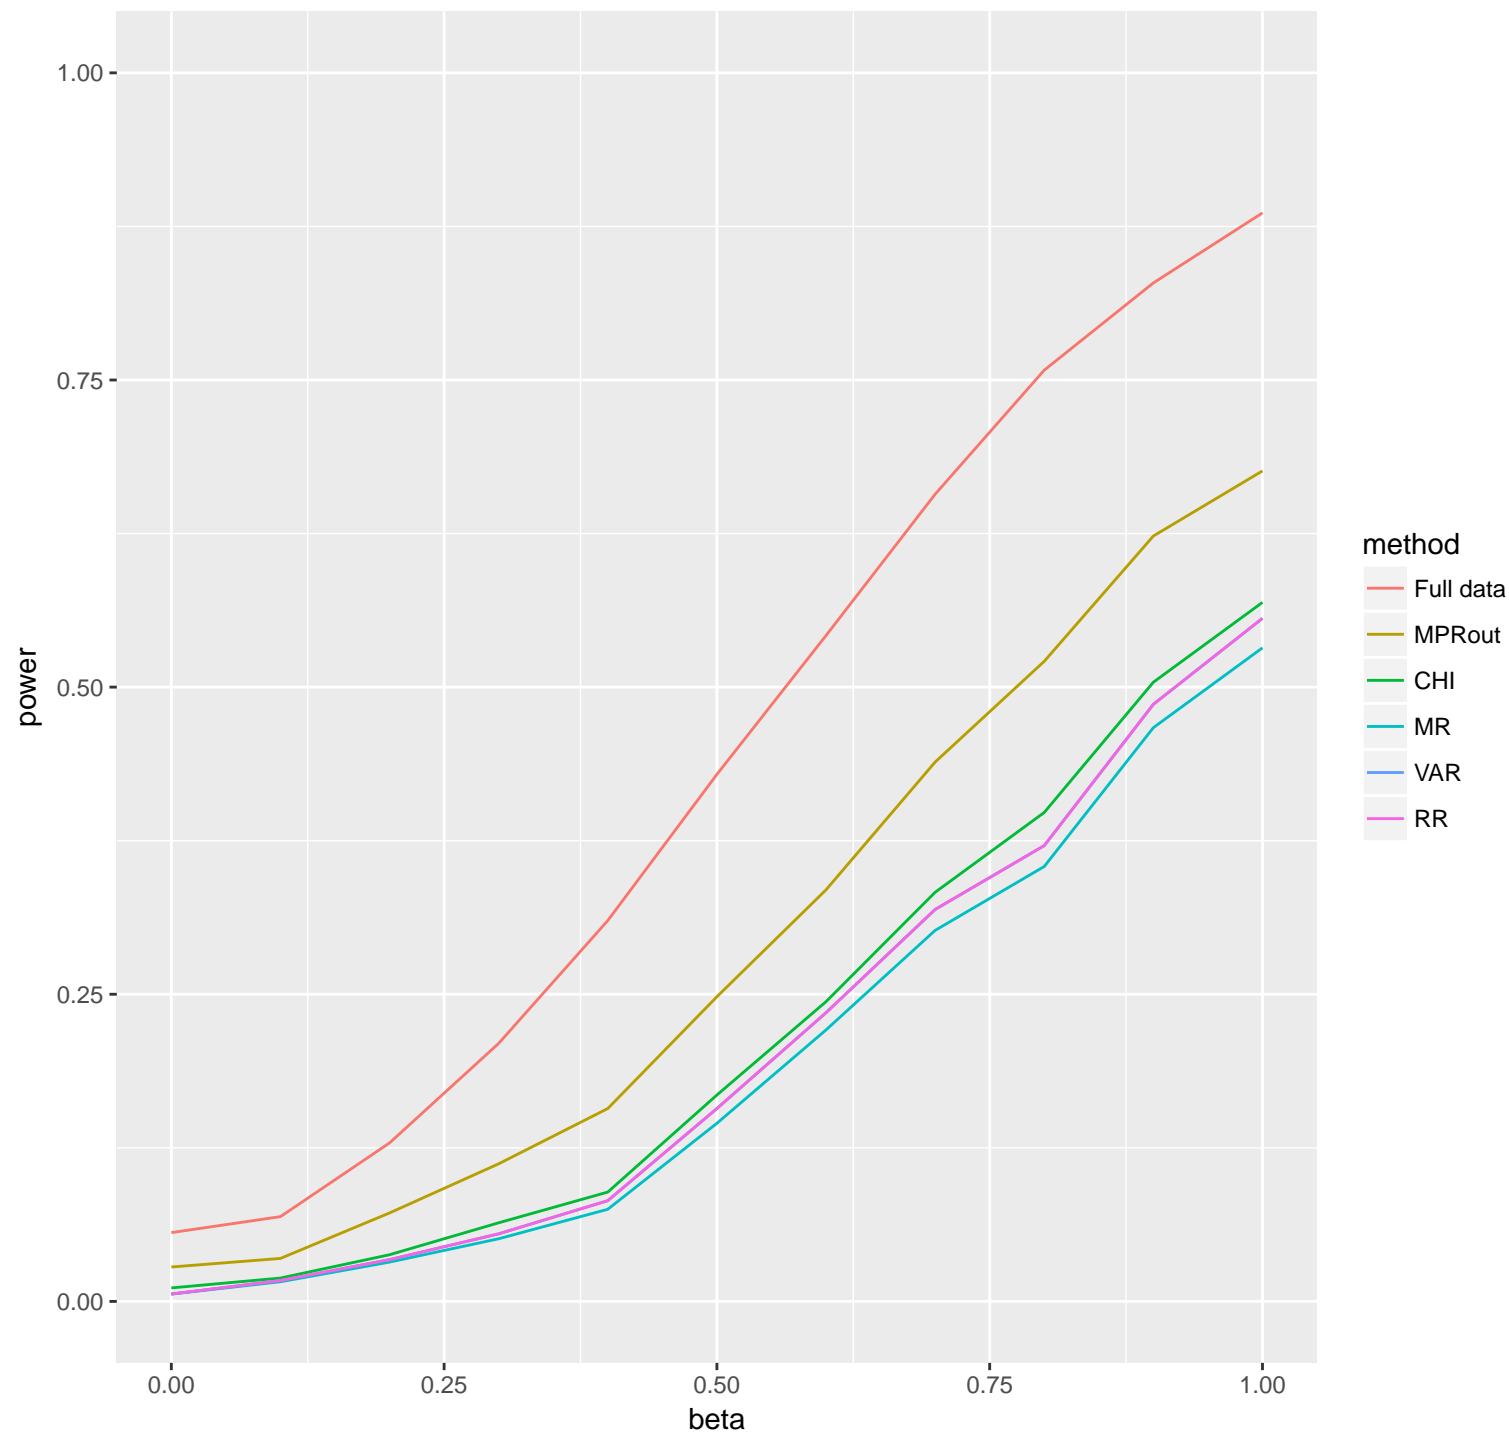

# Power for categorical variable (cor=0.2;0.4% missing)

Outcome excluded for all pooling methods

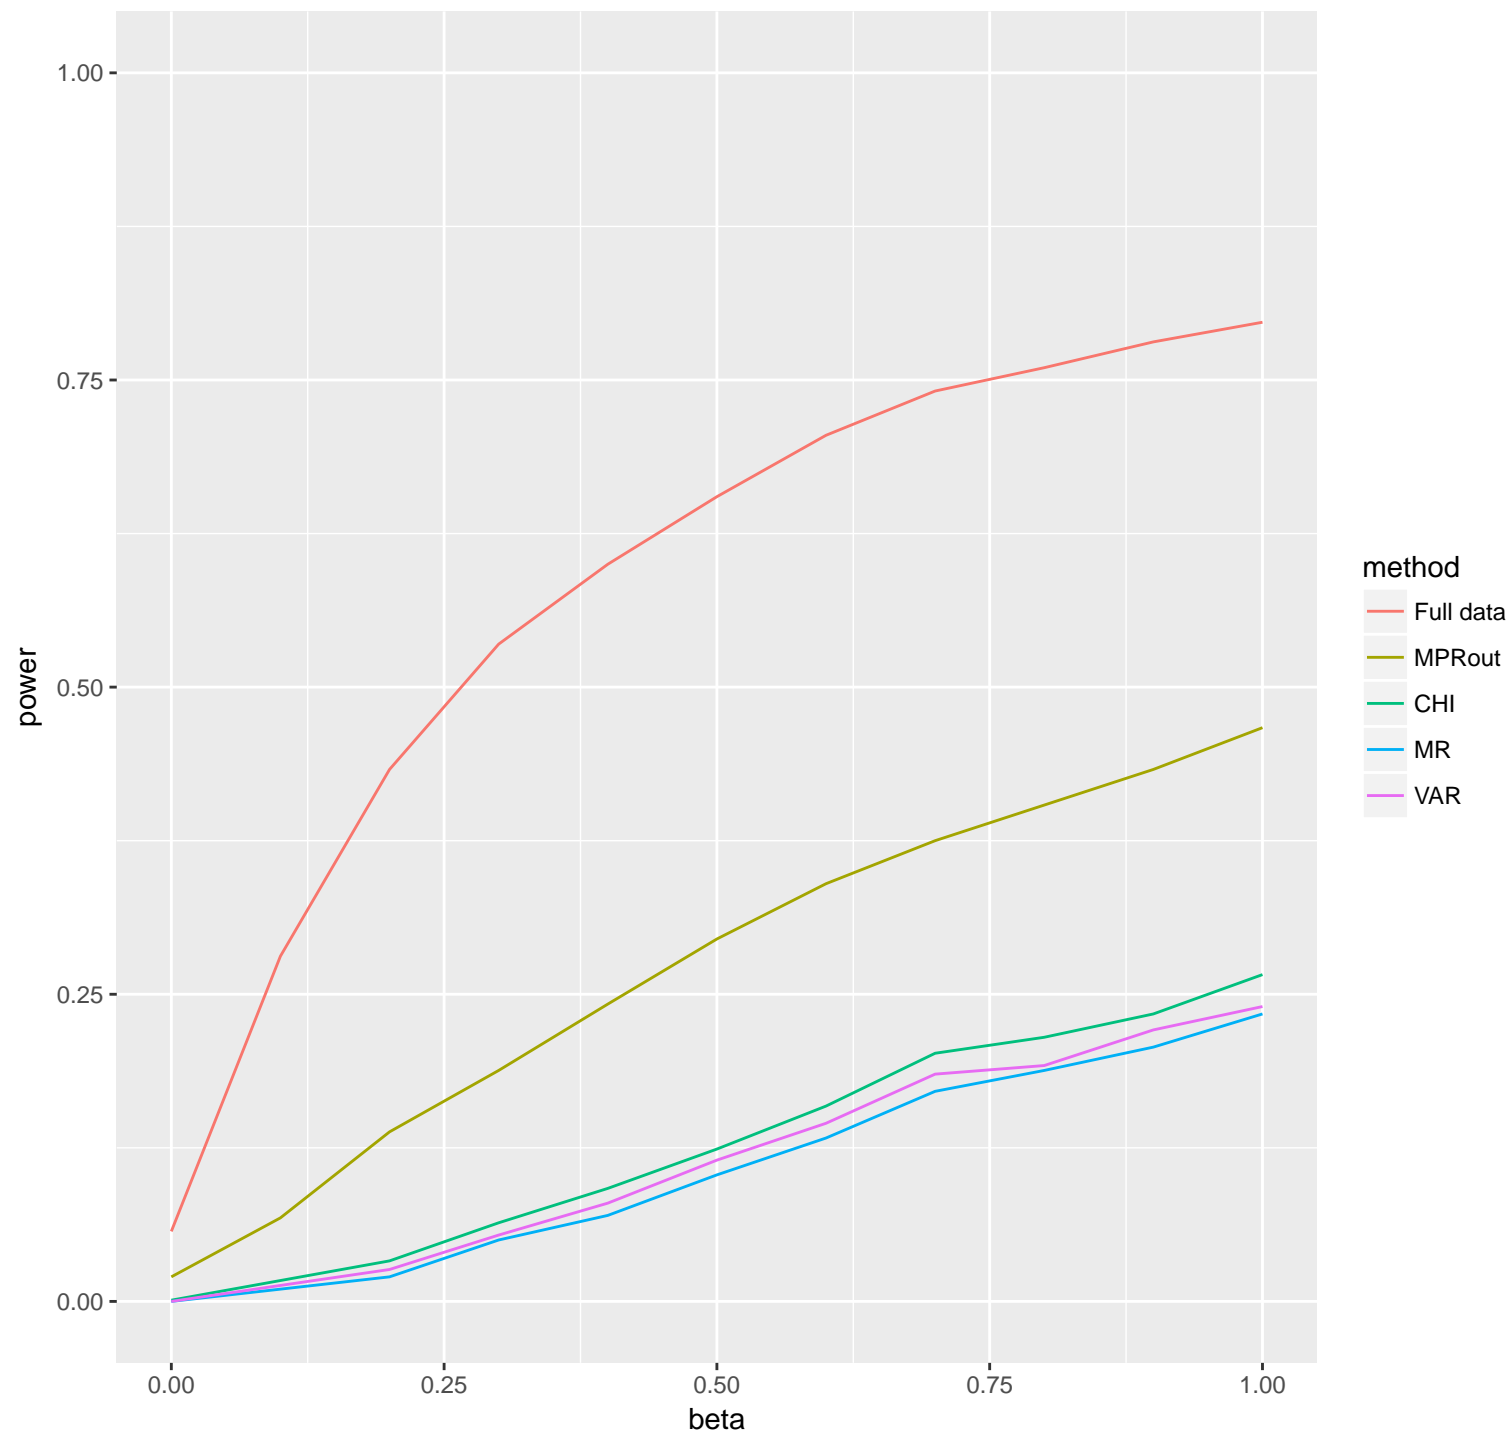

# Power for continuous variable (cor=0.2;0.4% missing)

Outcome excluded for all pooling methods

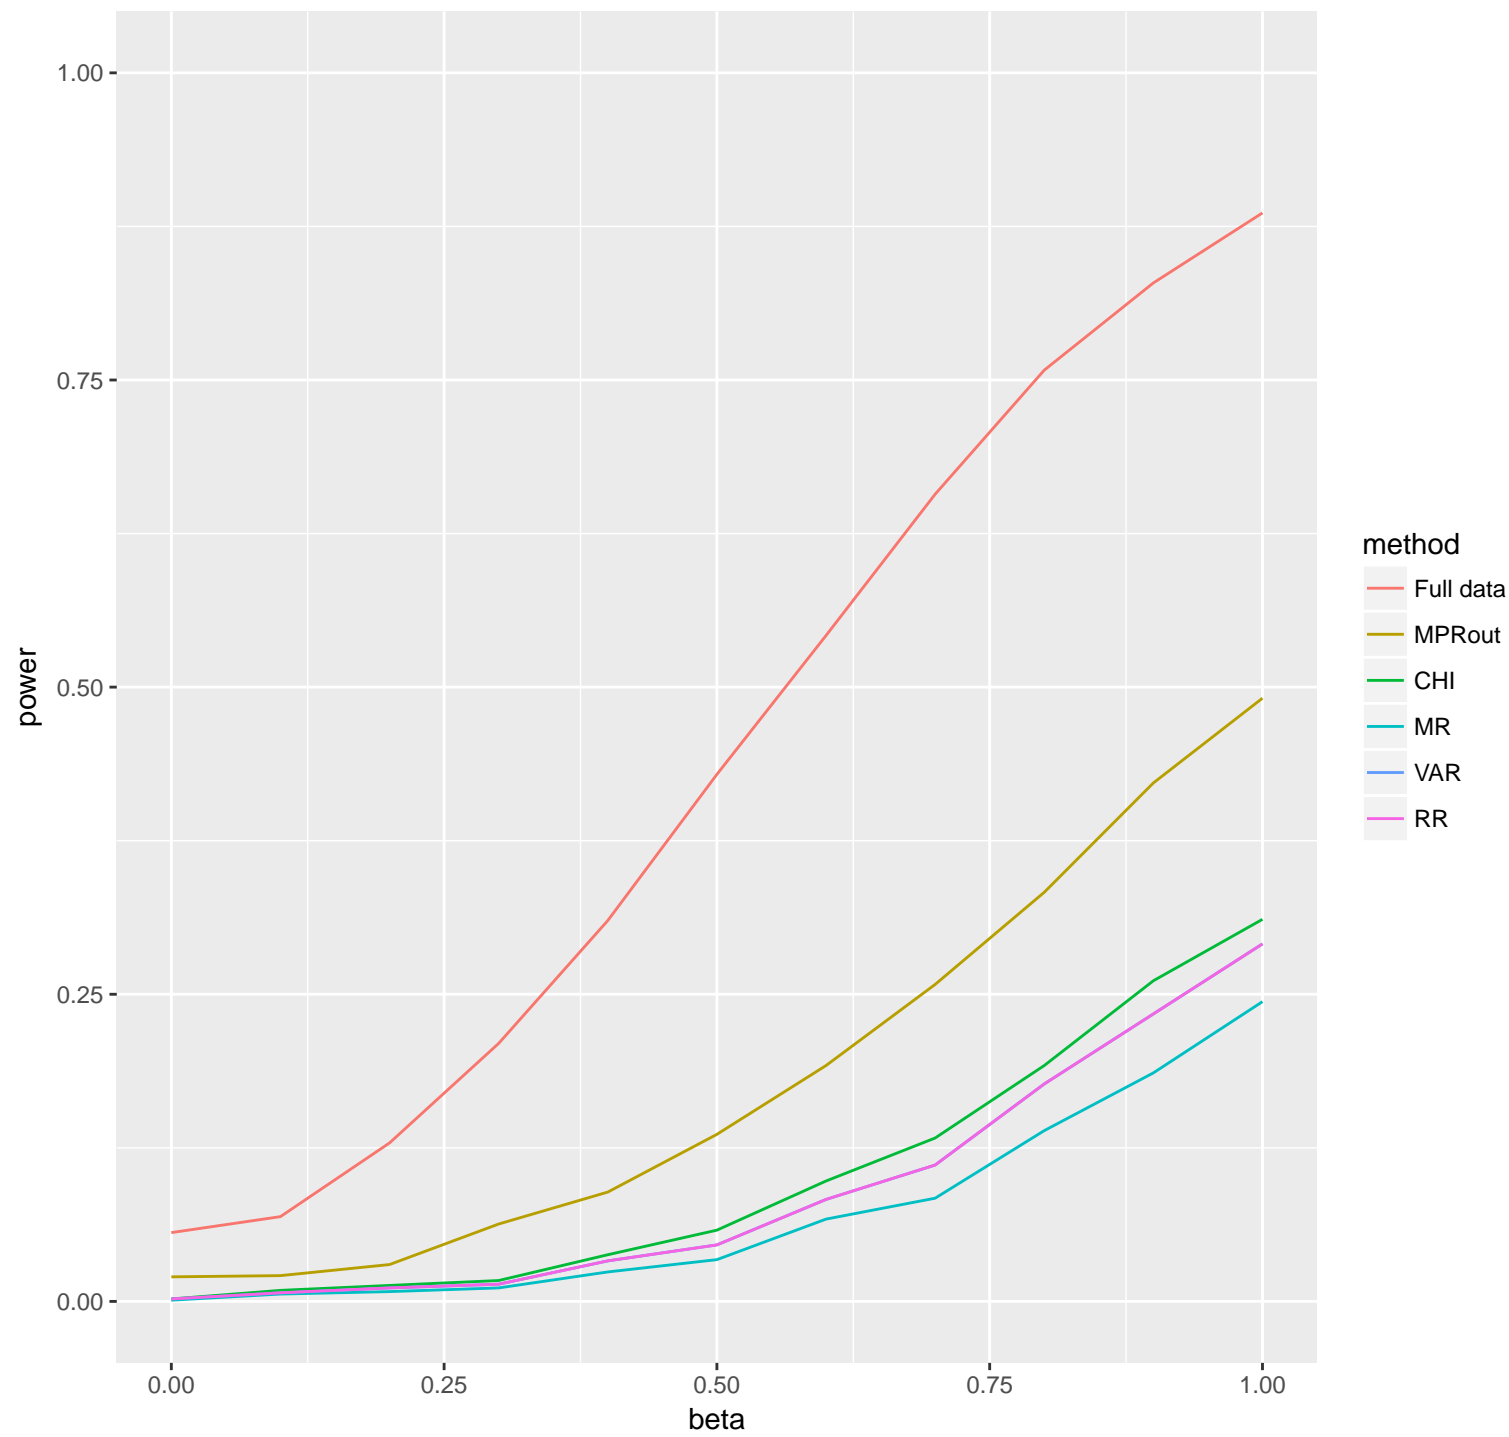



# Power for categorical variable (cor=0.4;0.25% missing)

Outcome excluded for all pooling methods

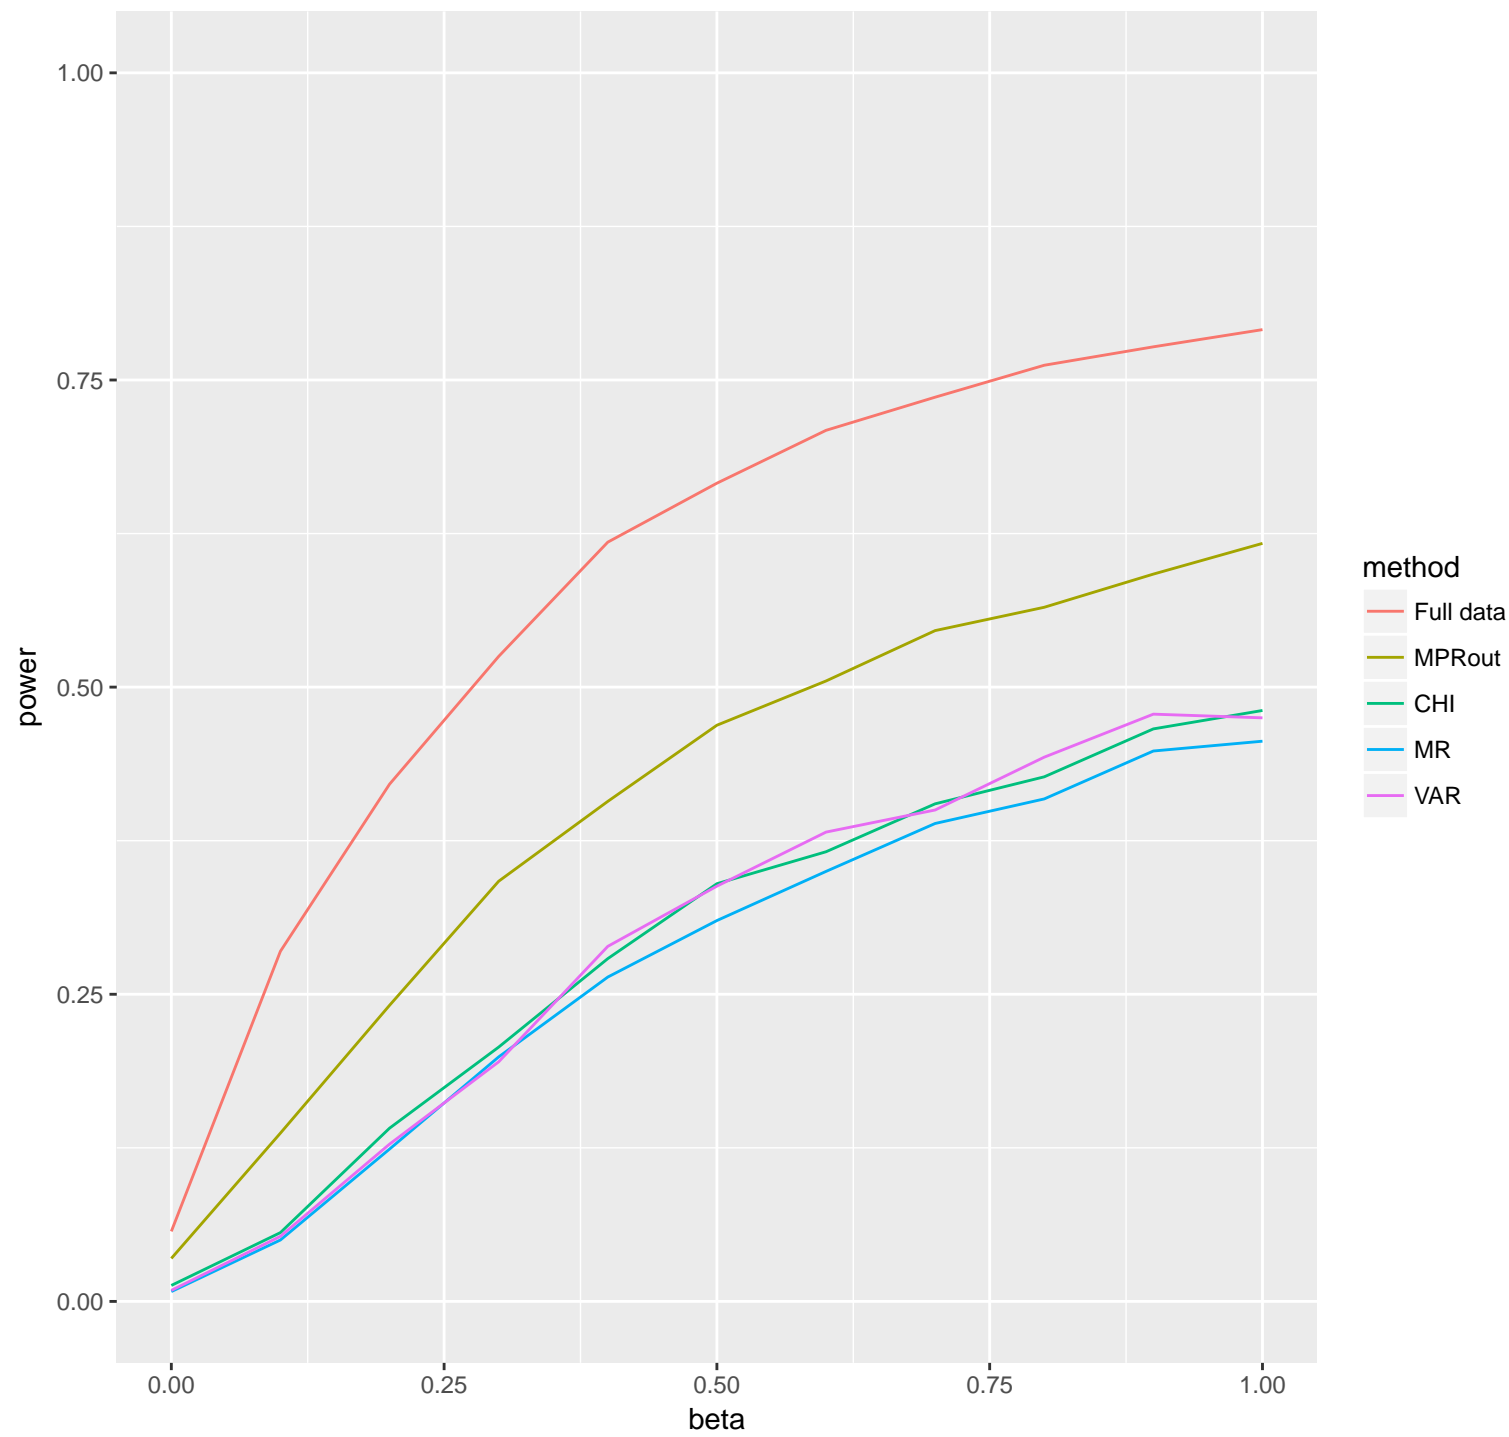

# Power for continuous variable (cor=0.4;0.25% missing)

Outcome excluded for all pooling methods

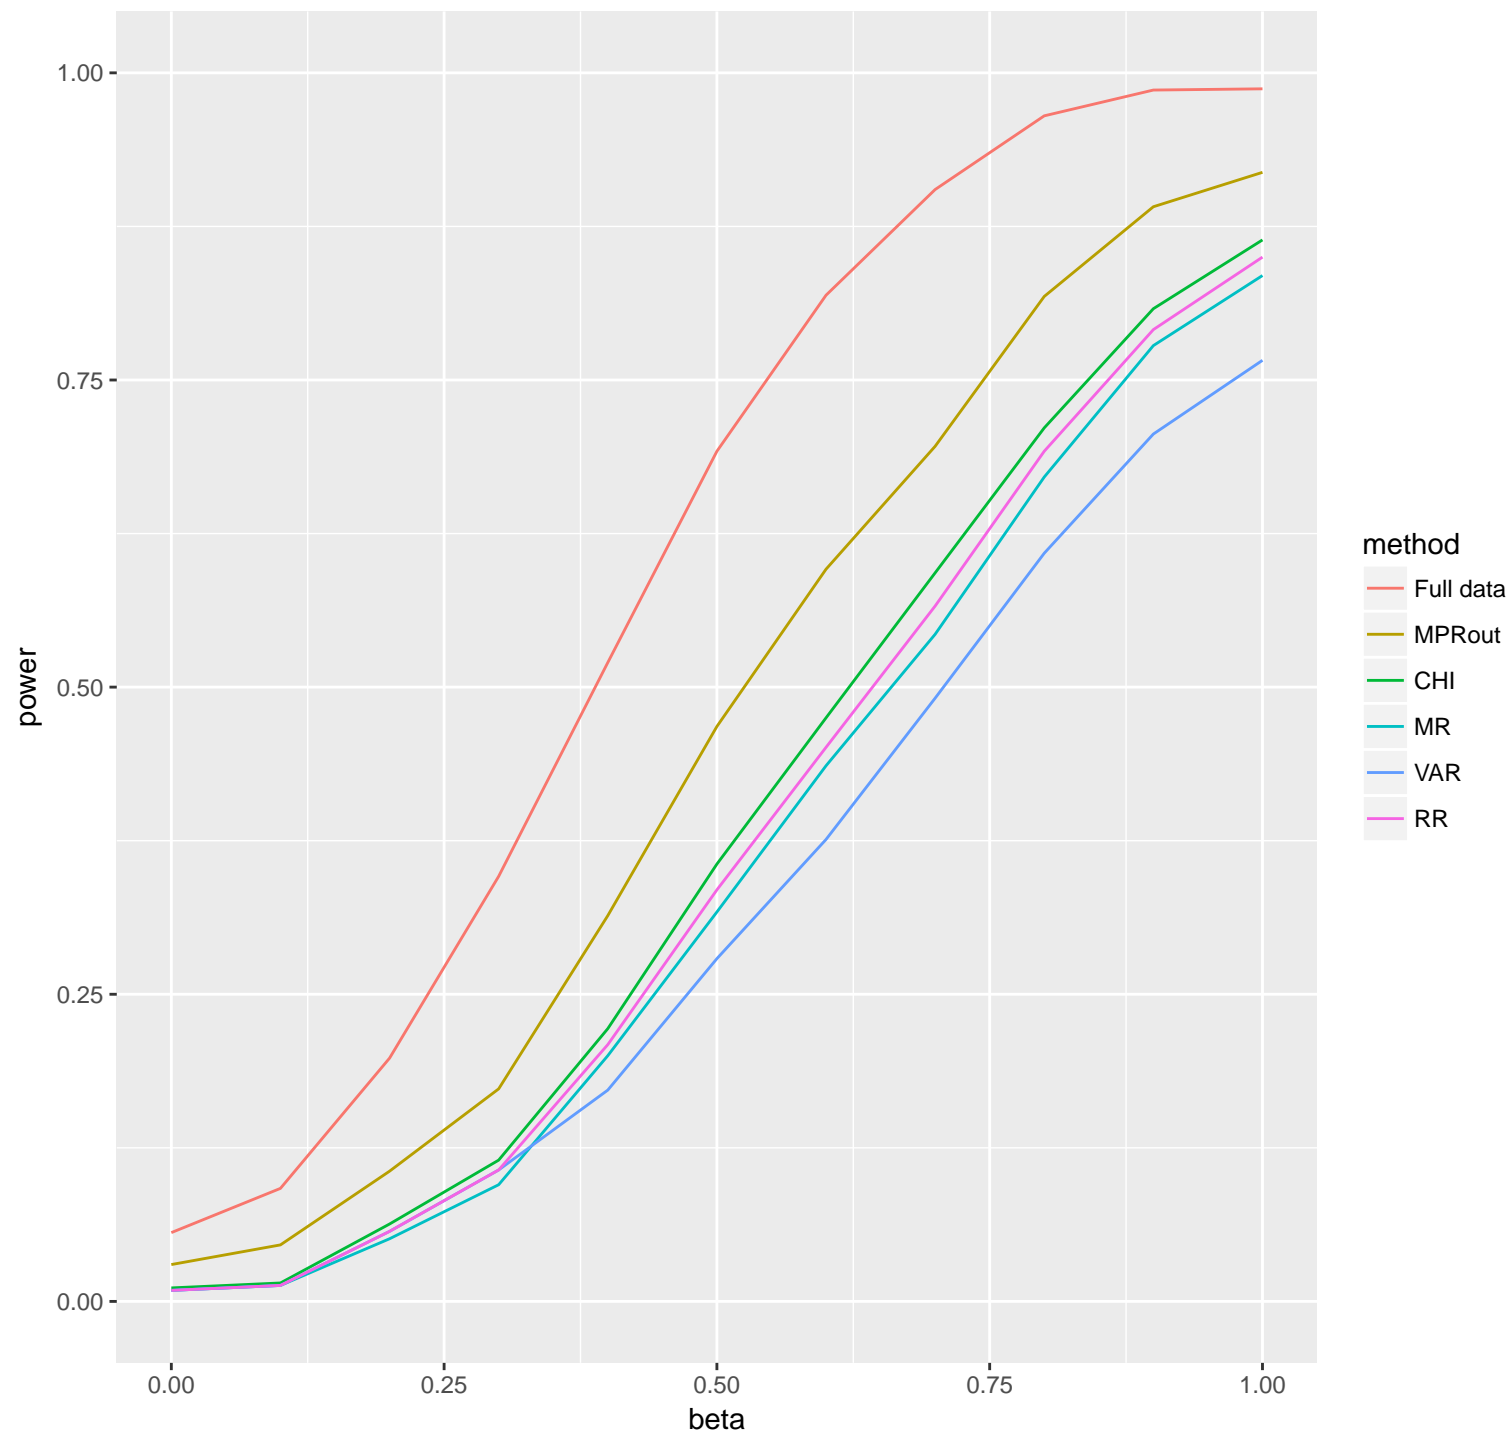

# Power for categorical variable (cor=0.4;0.4% missing)

Outcome excluded for all pooling methods

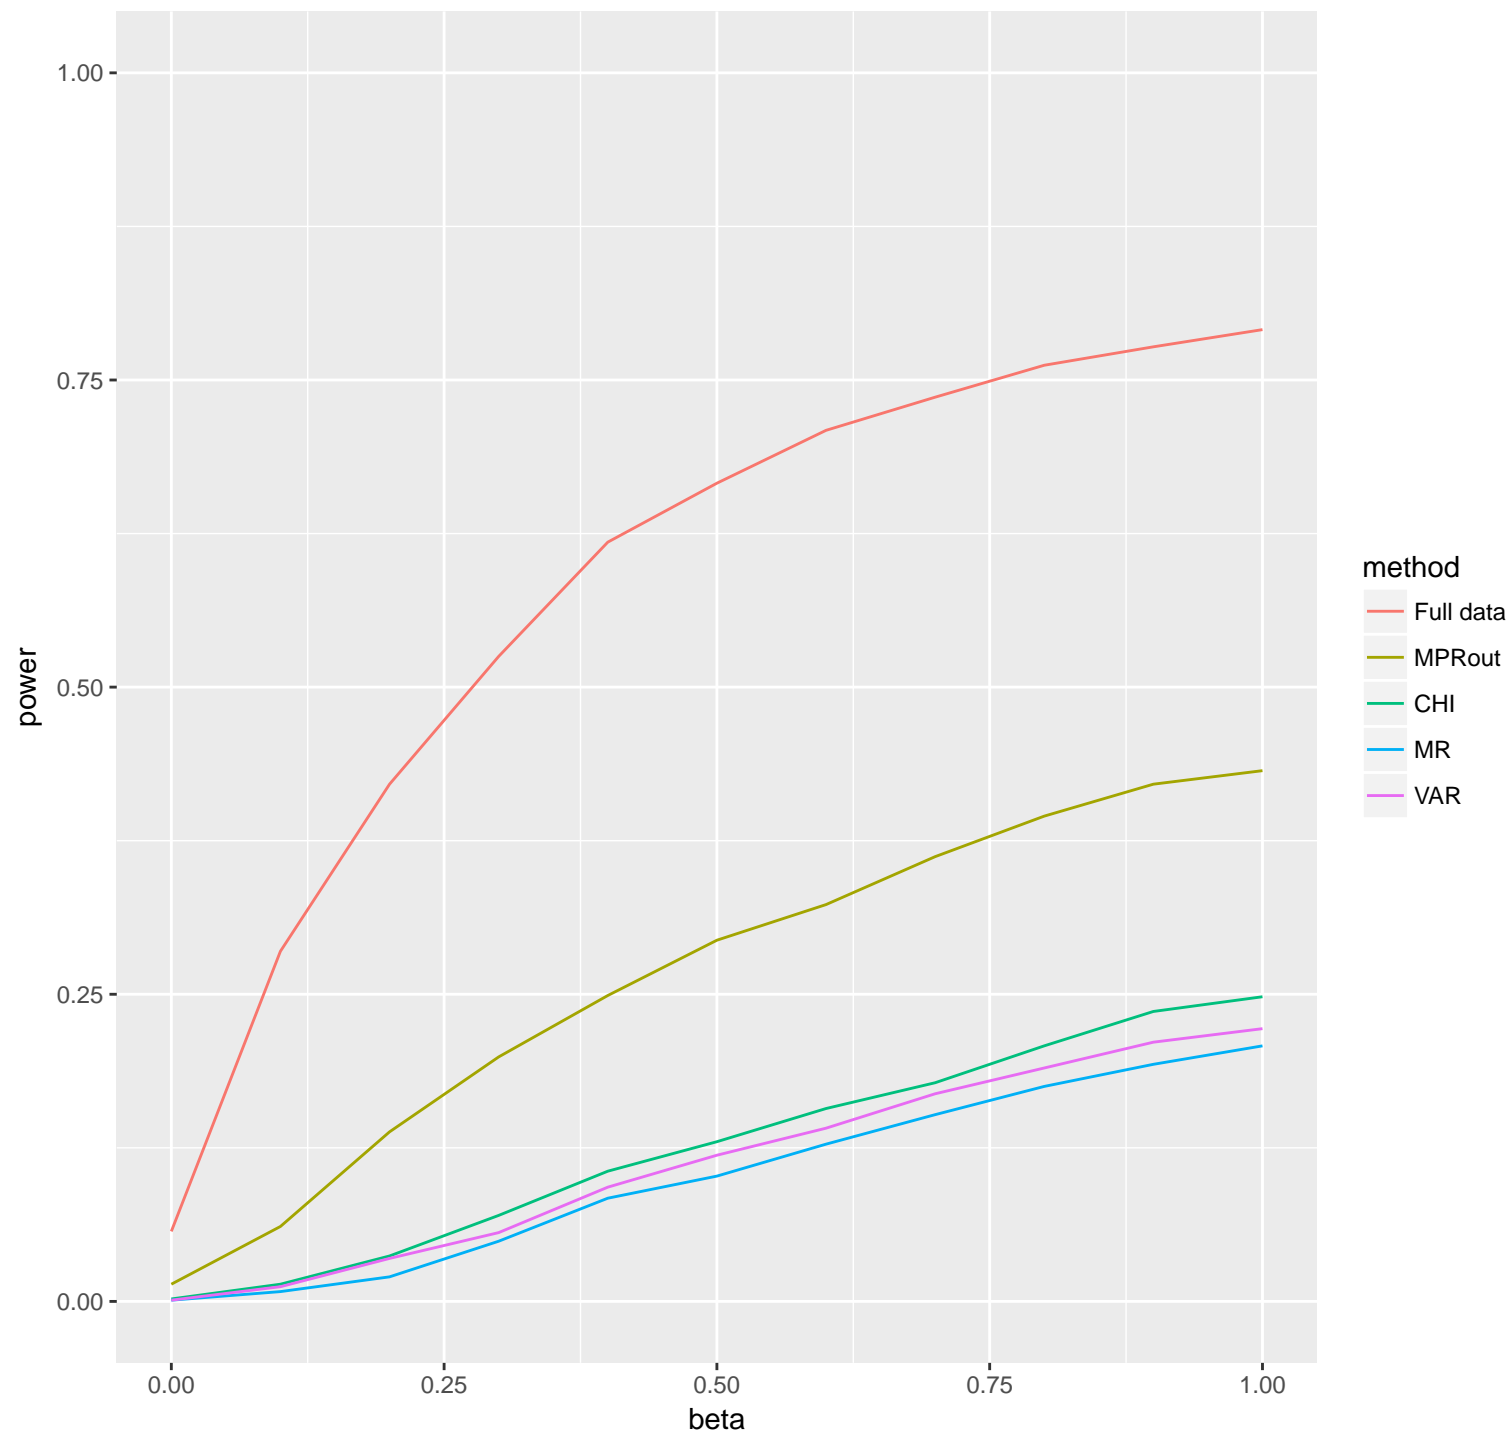

# Power for continuous variable (cor=0.4;0.4% missing)

Outcome excluded for all pooling methods

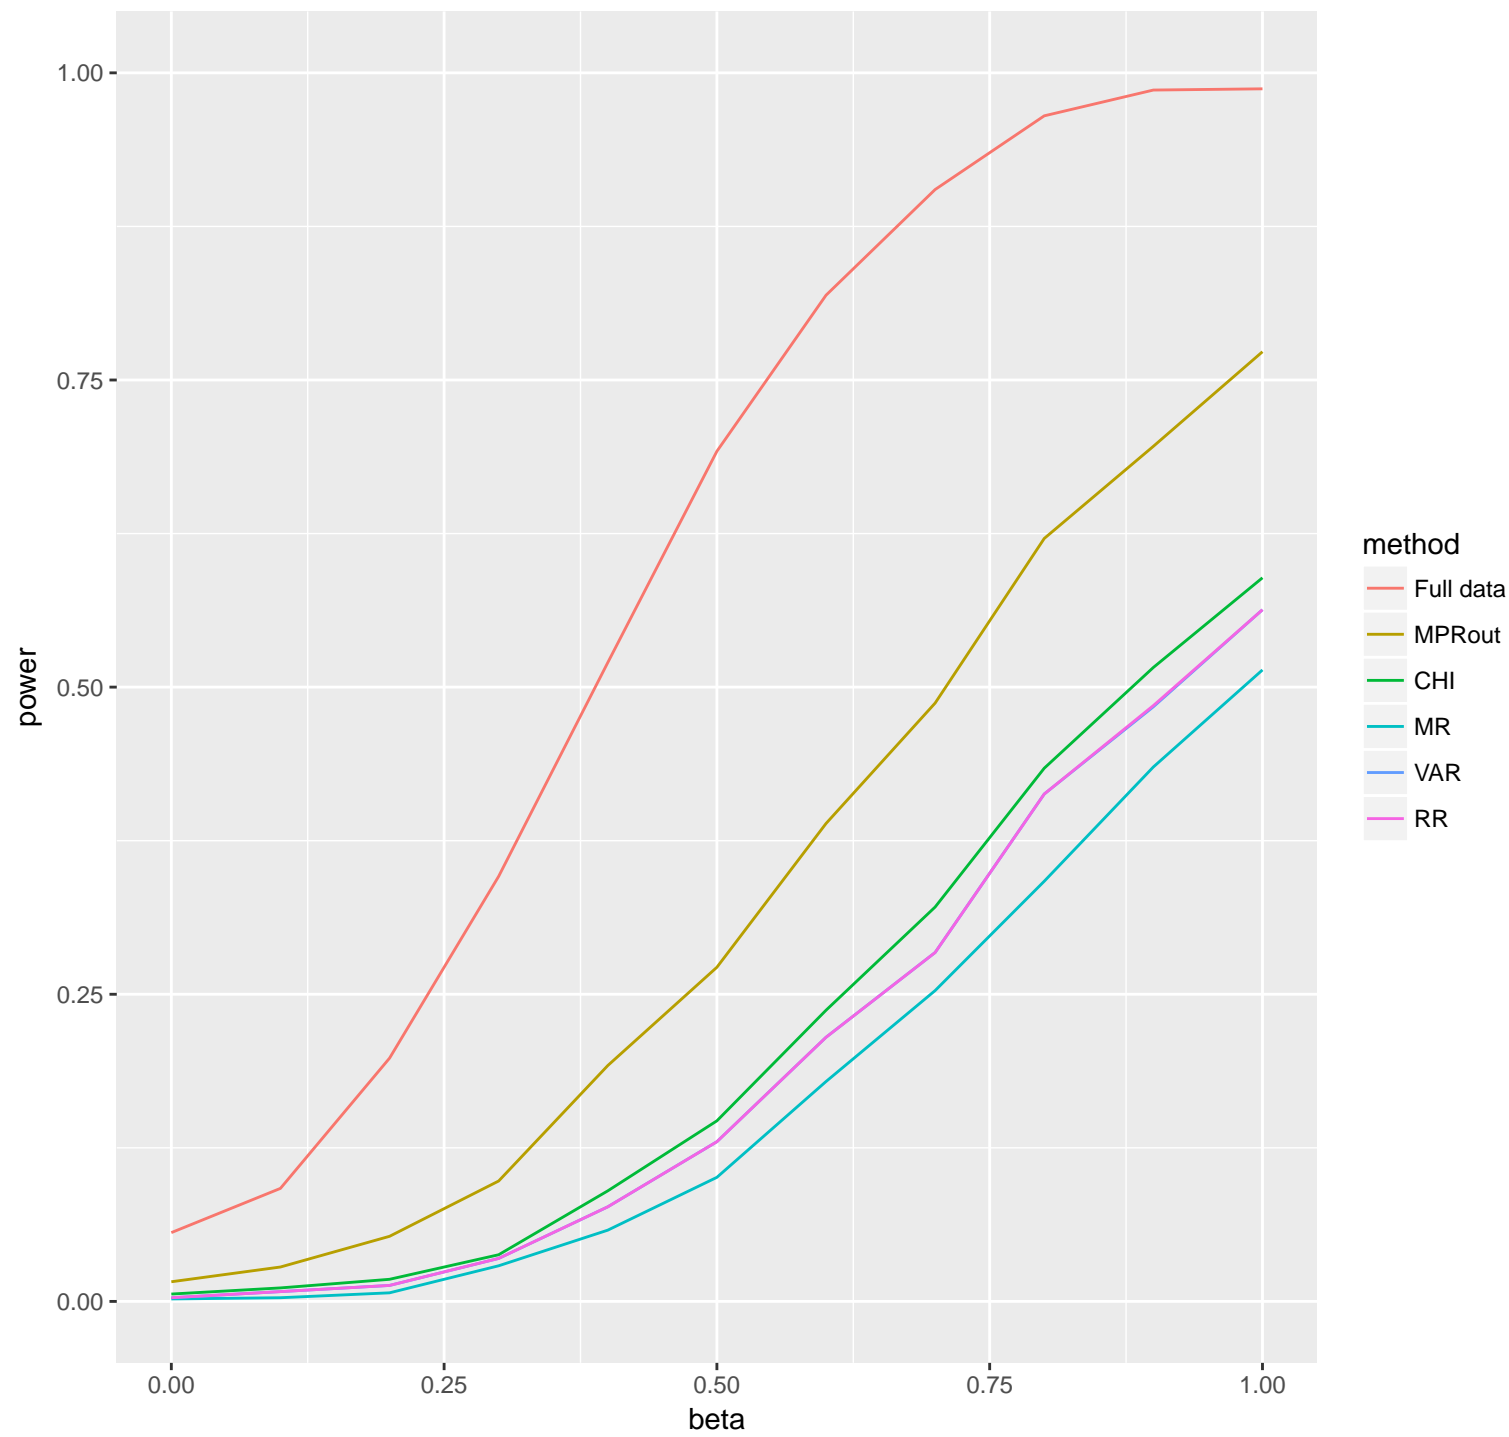

# Power for categorical variable (cor=0.6;0.25% missing)

Outcome excluded for all pooling methods

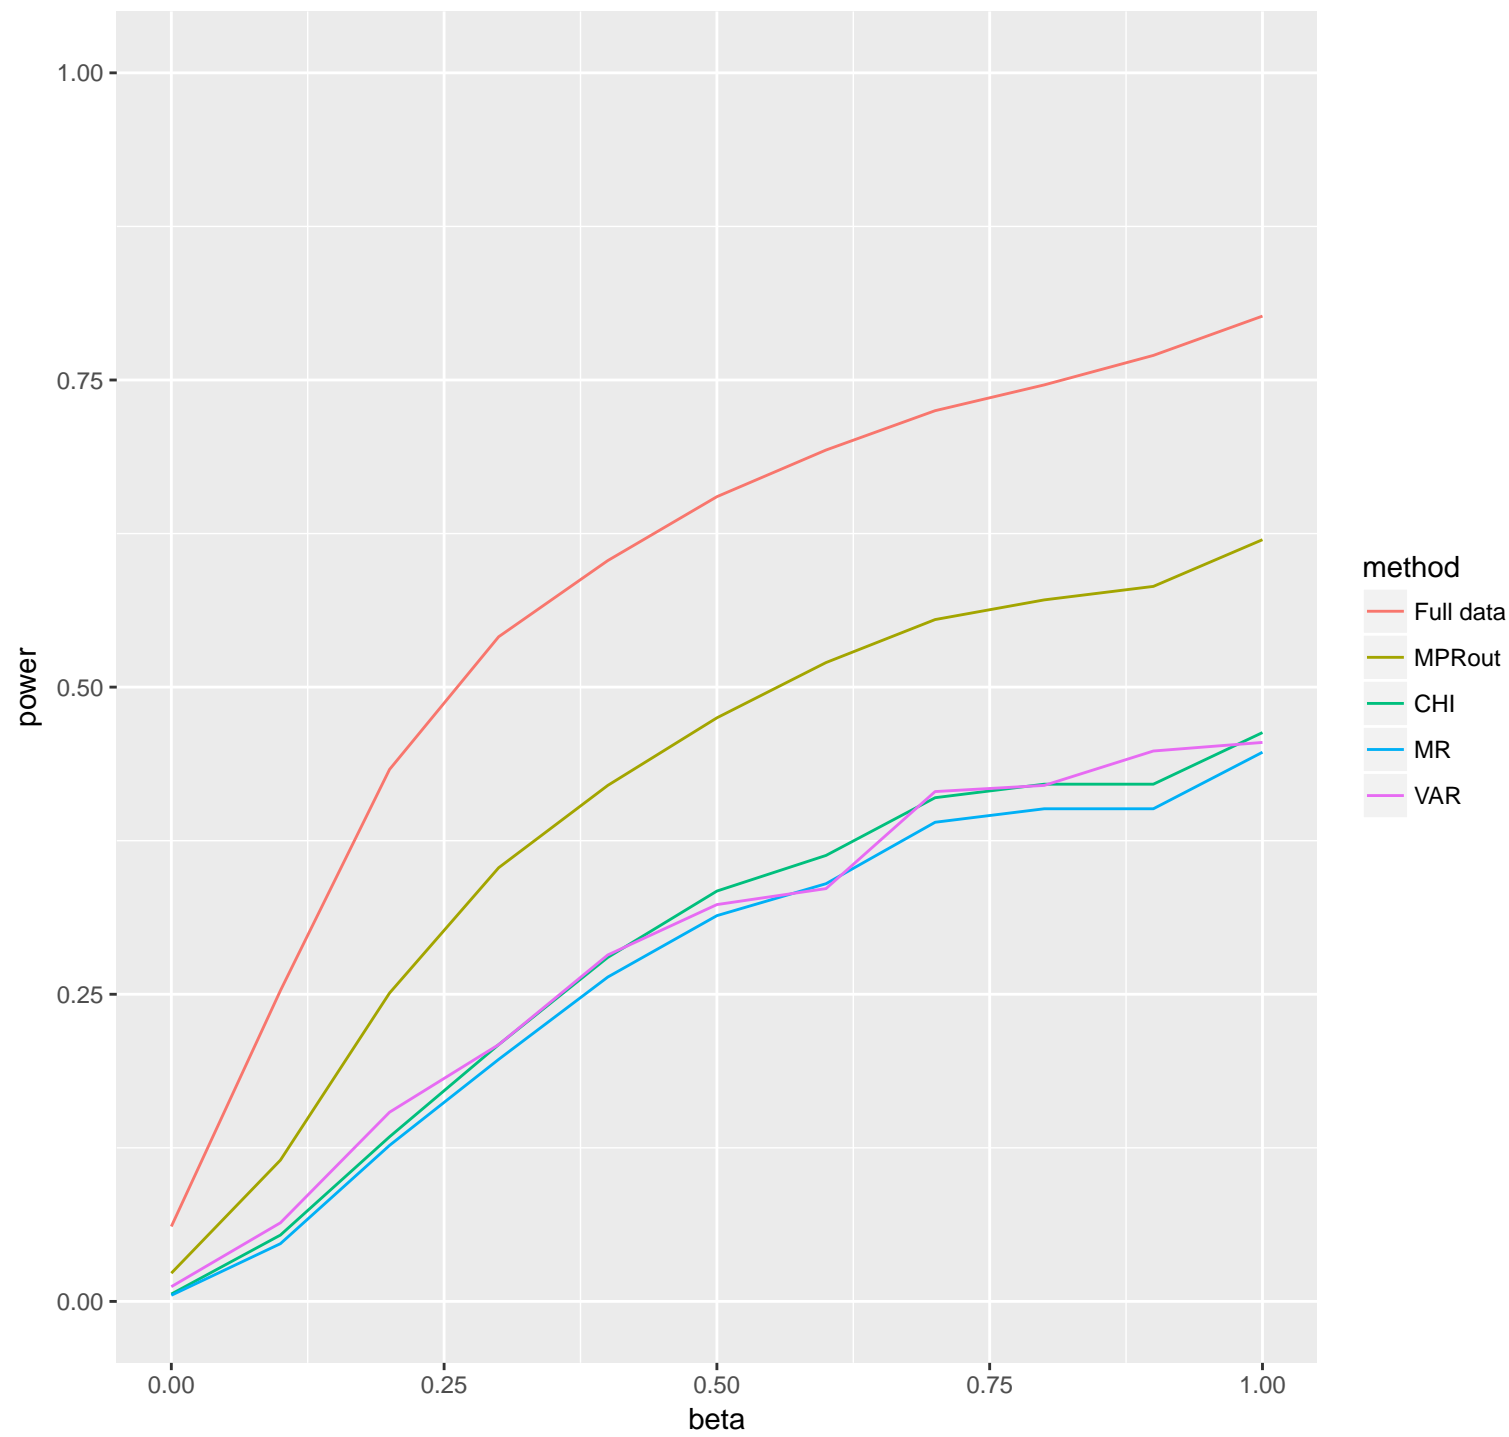

# Power for continuous variable (cor=0.6;0.25% missing)

Outcome excluded for all pooling methods

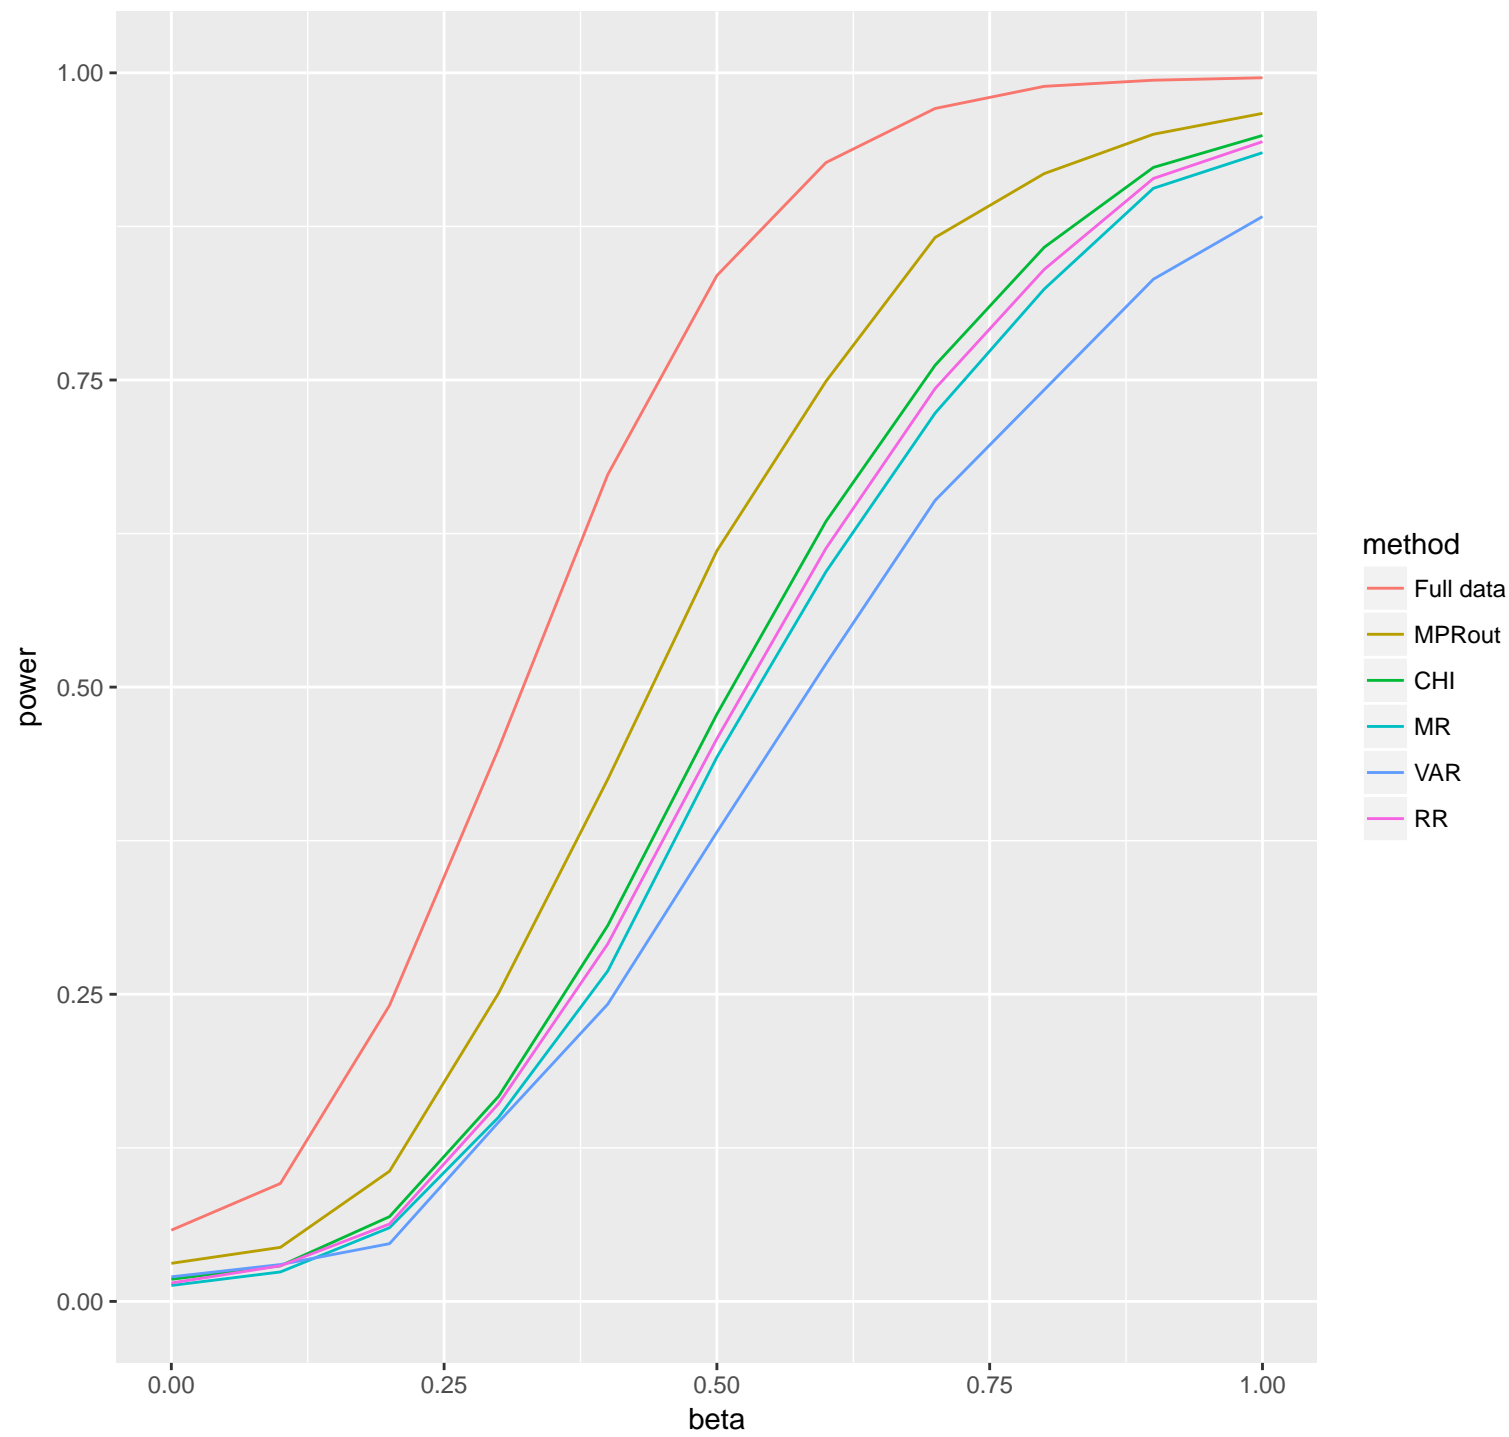

# Power for categorical variable (cor=0.6;0.4% missing)

Outcome excluded for all pooling methods

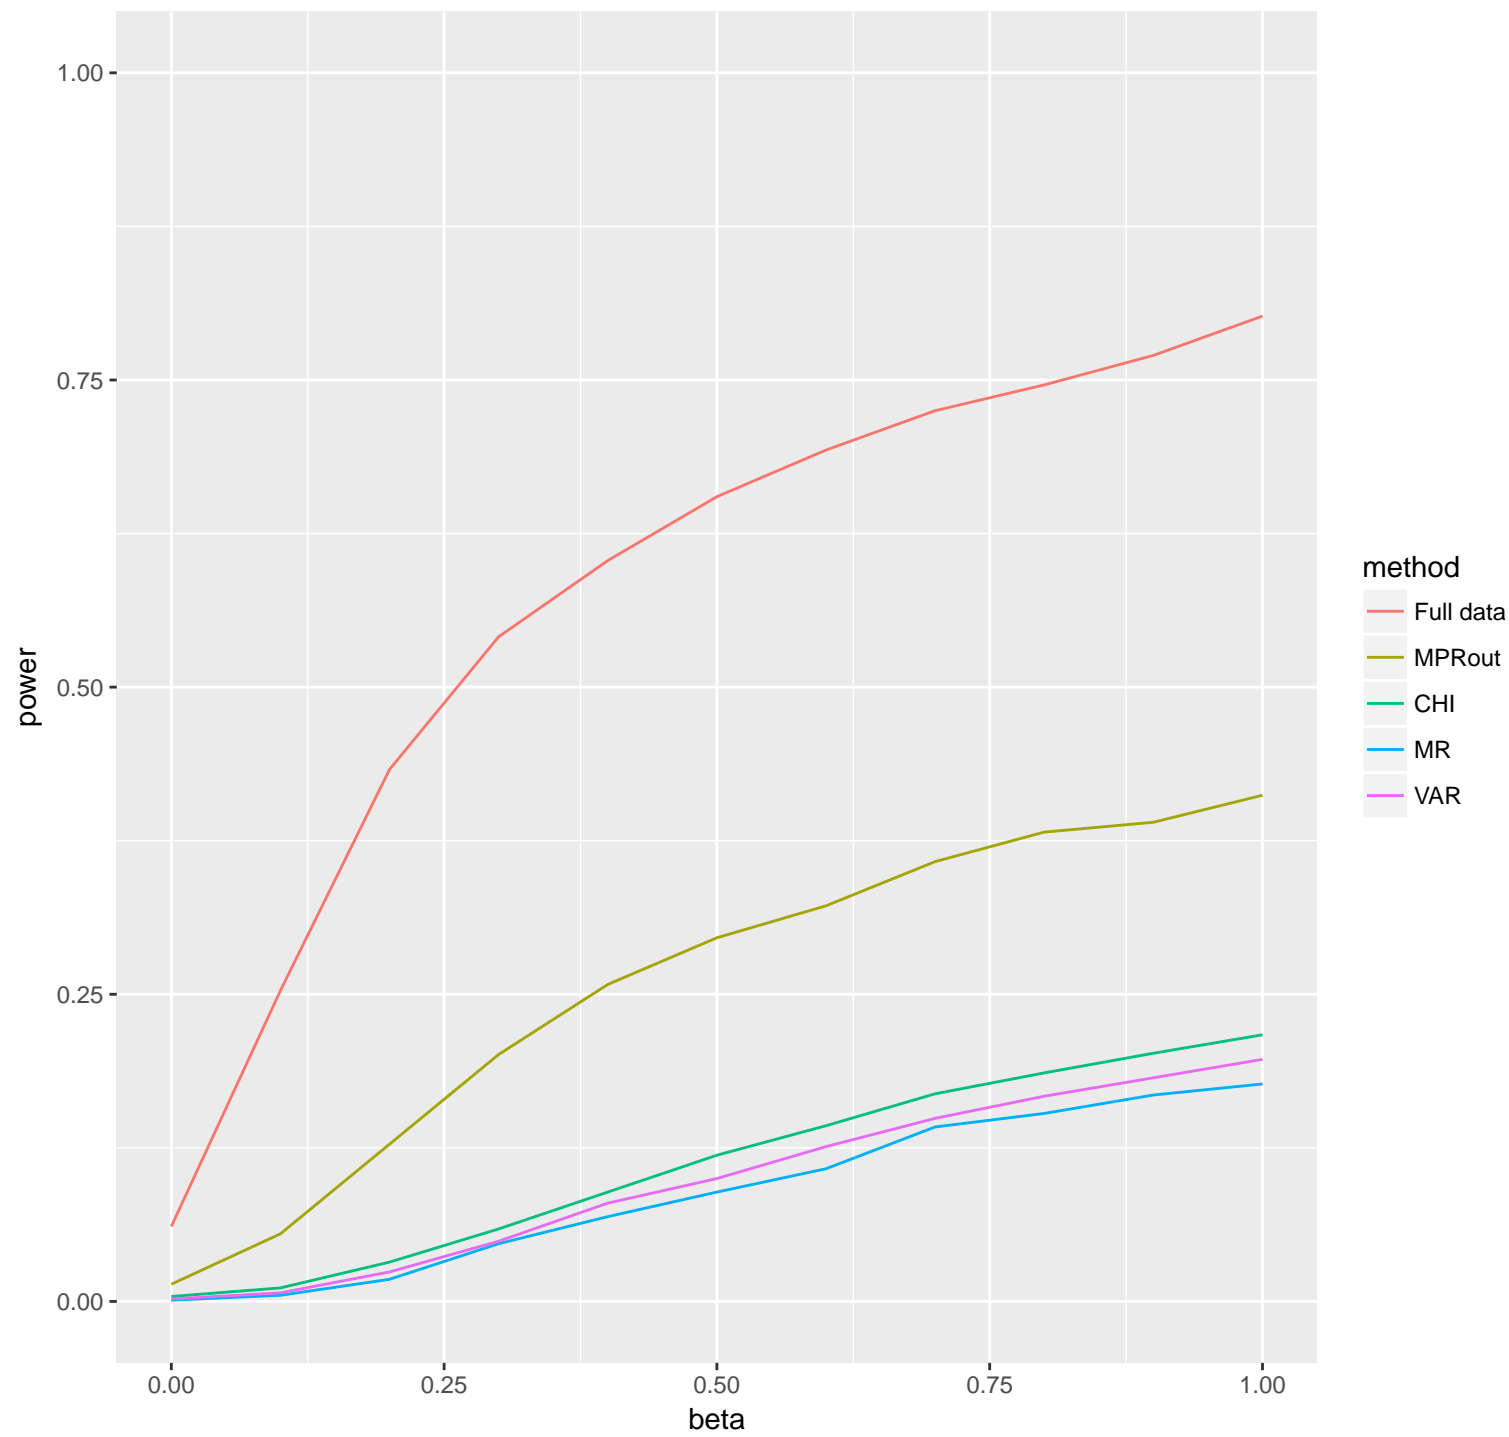

# Power for continuous variable (cor=0.6;0.4% missing)

Outcome excluded for all pooling methods

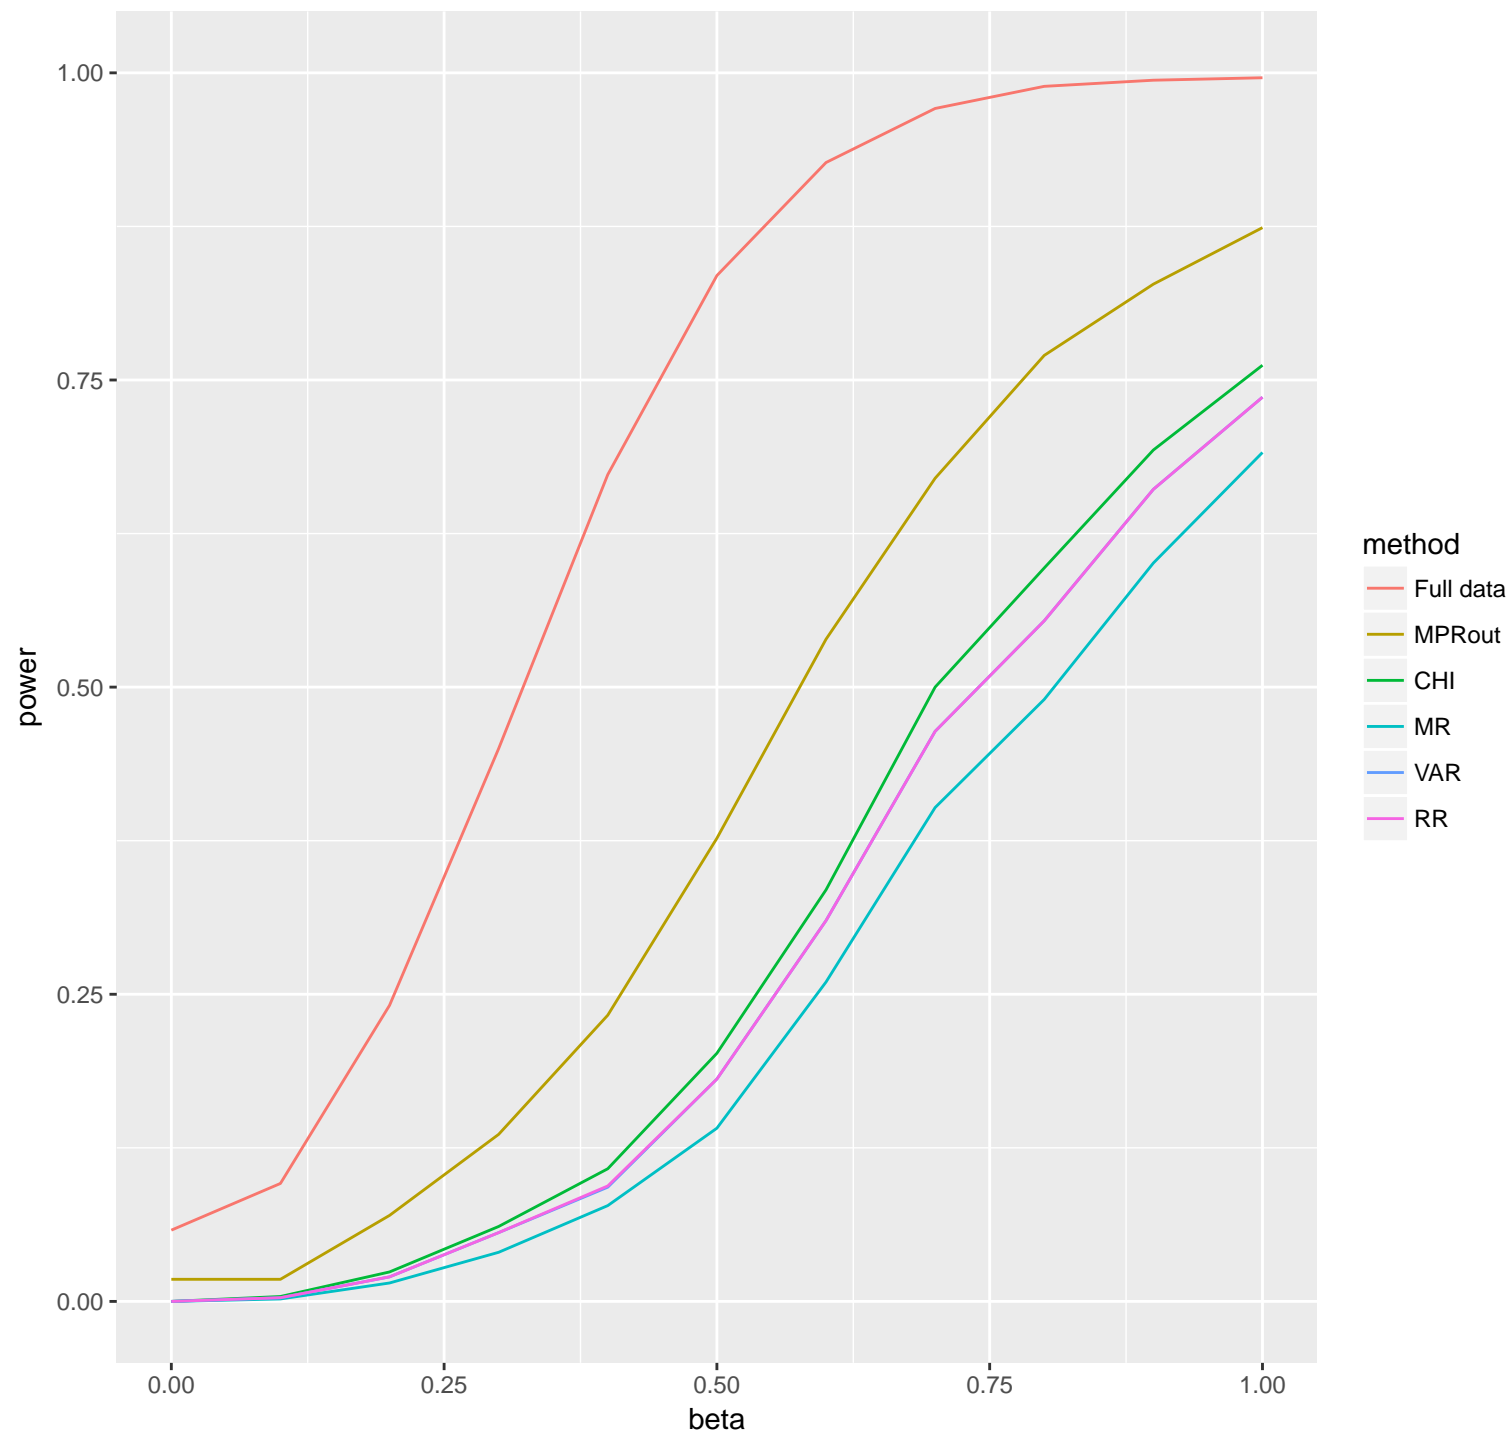



# Power for categorical variable (cor=0.8;0.25% missing)

Outcome excluded for all pooling methods

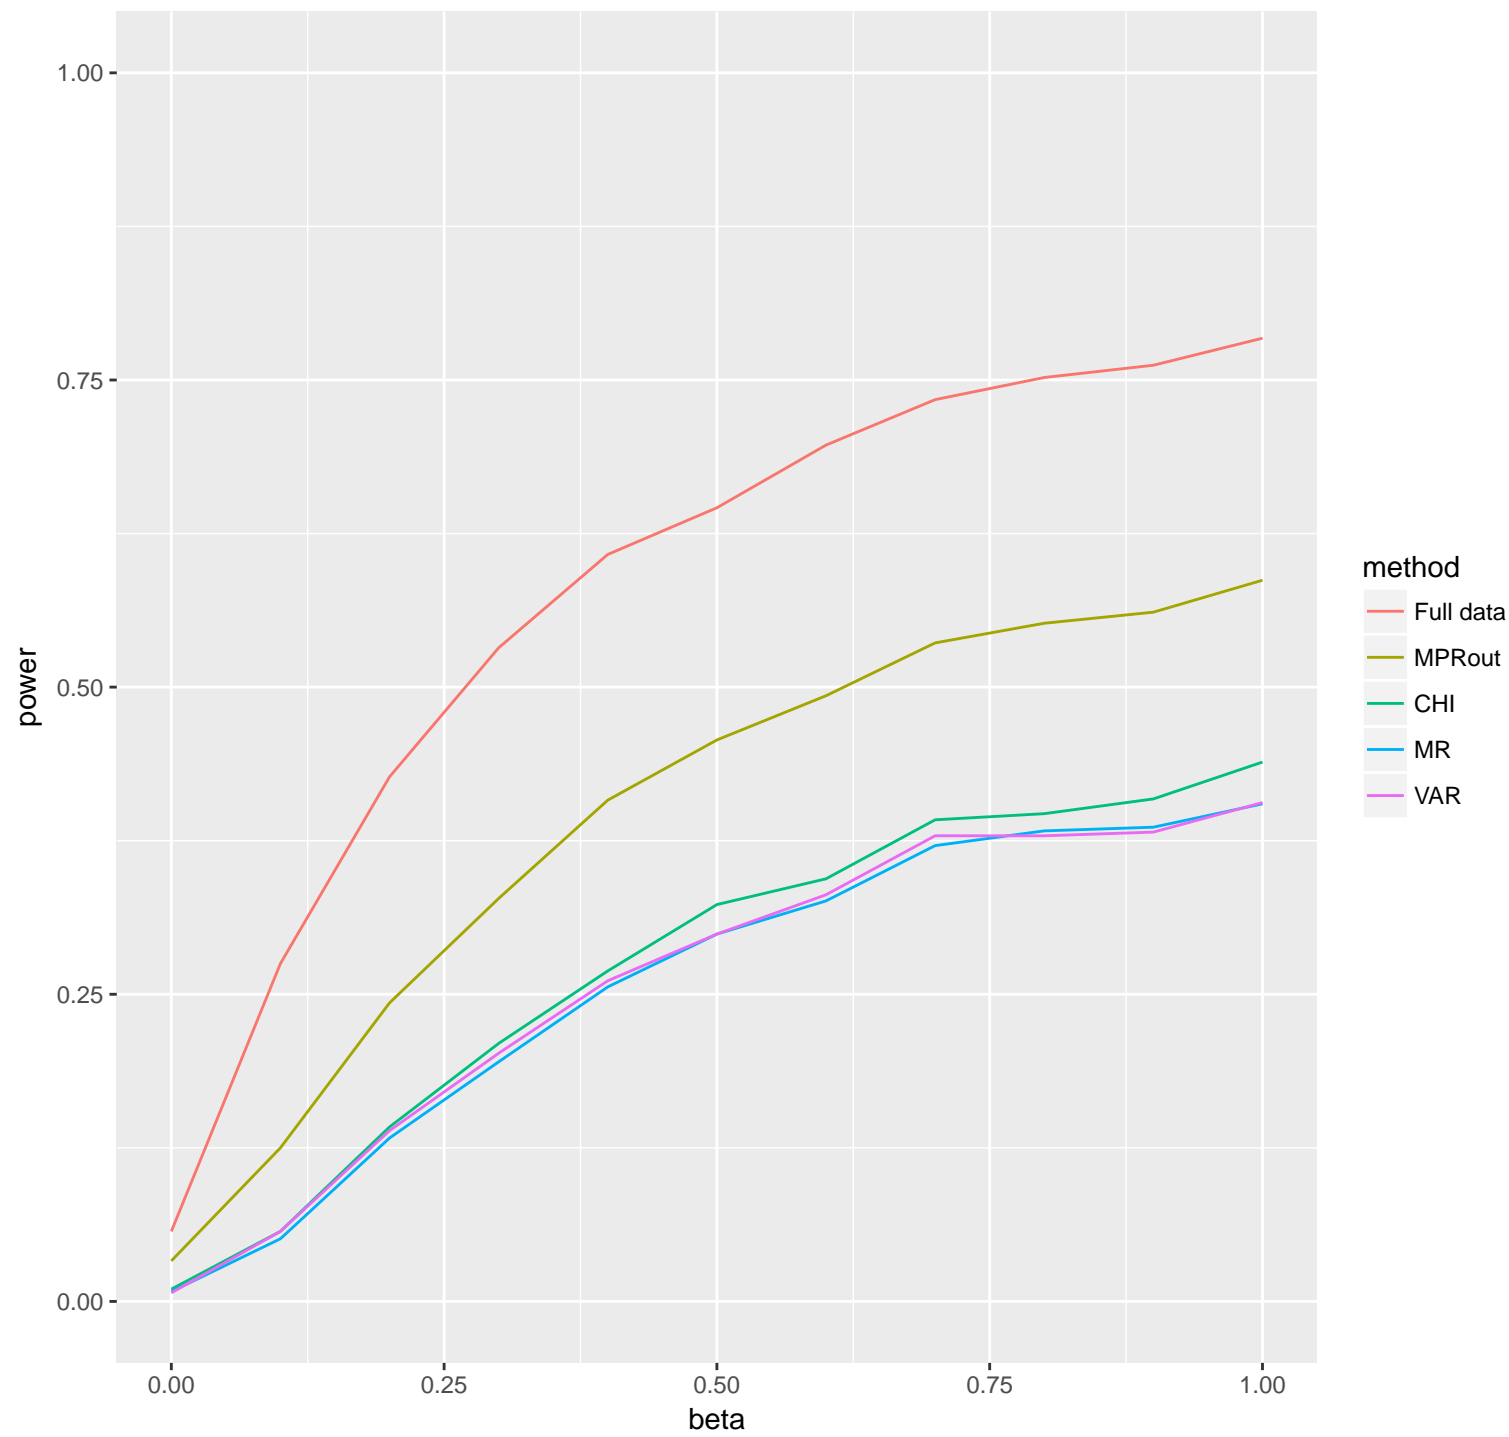

# Power for continuous variable (cor=0.8;0.25% missing)

Outcome excluded for all pooling methods

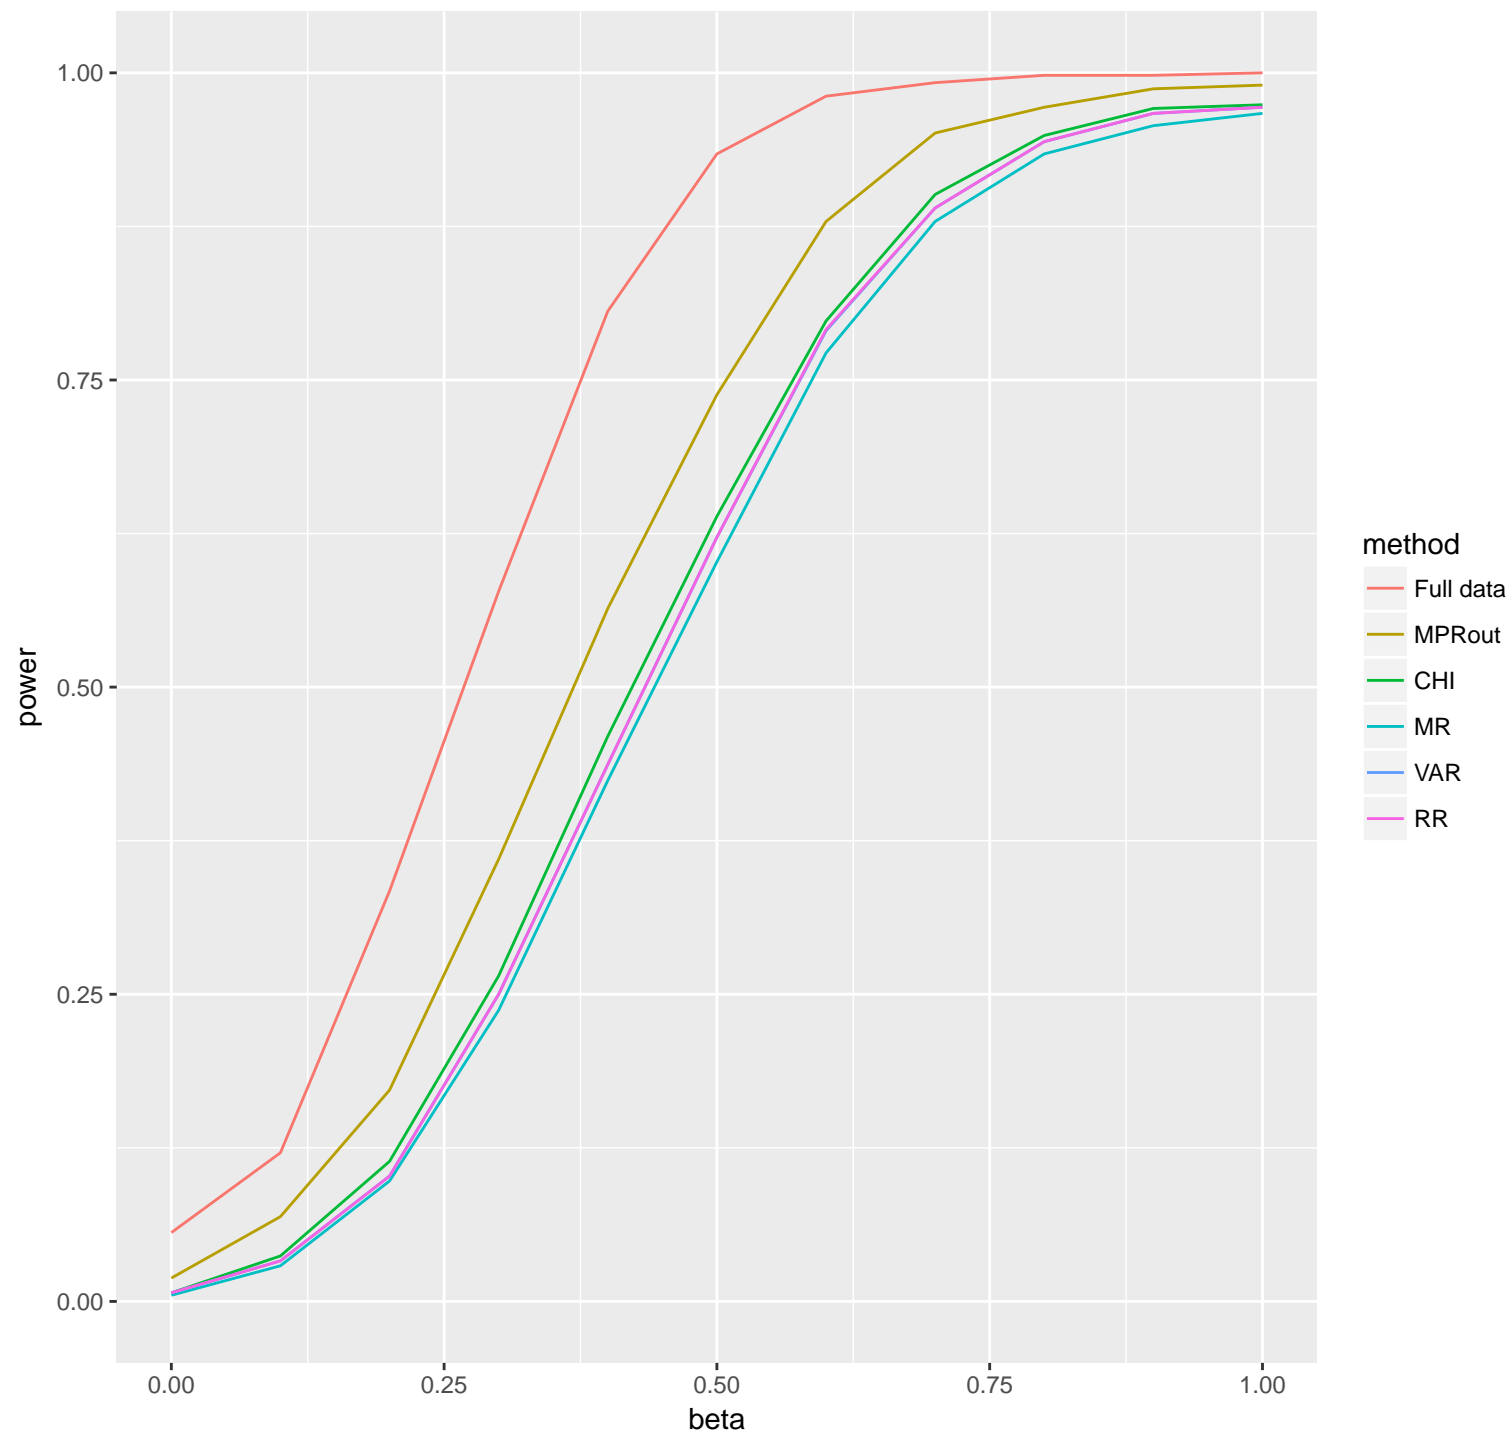

# Power for categorical variable (cor=0.8;0.4% missing)

Outcome excluded for all pooling methods

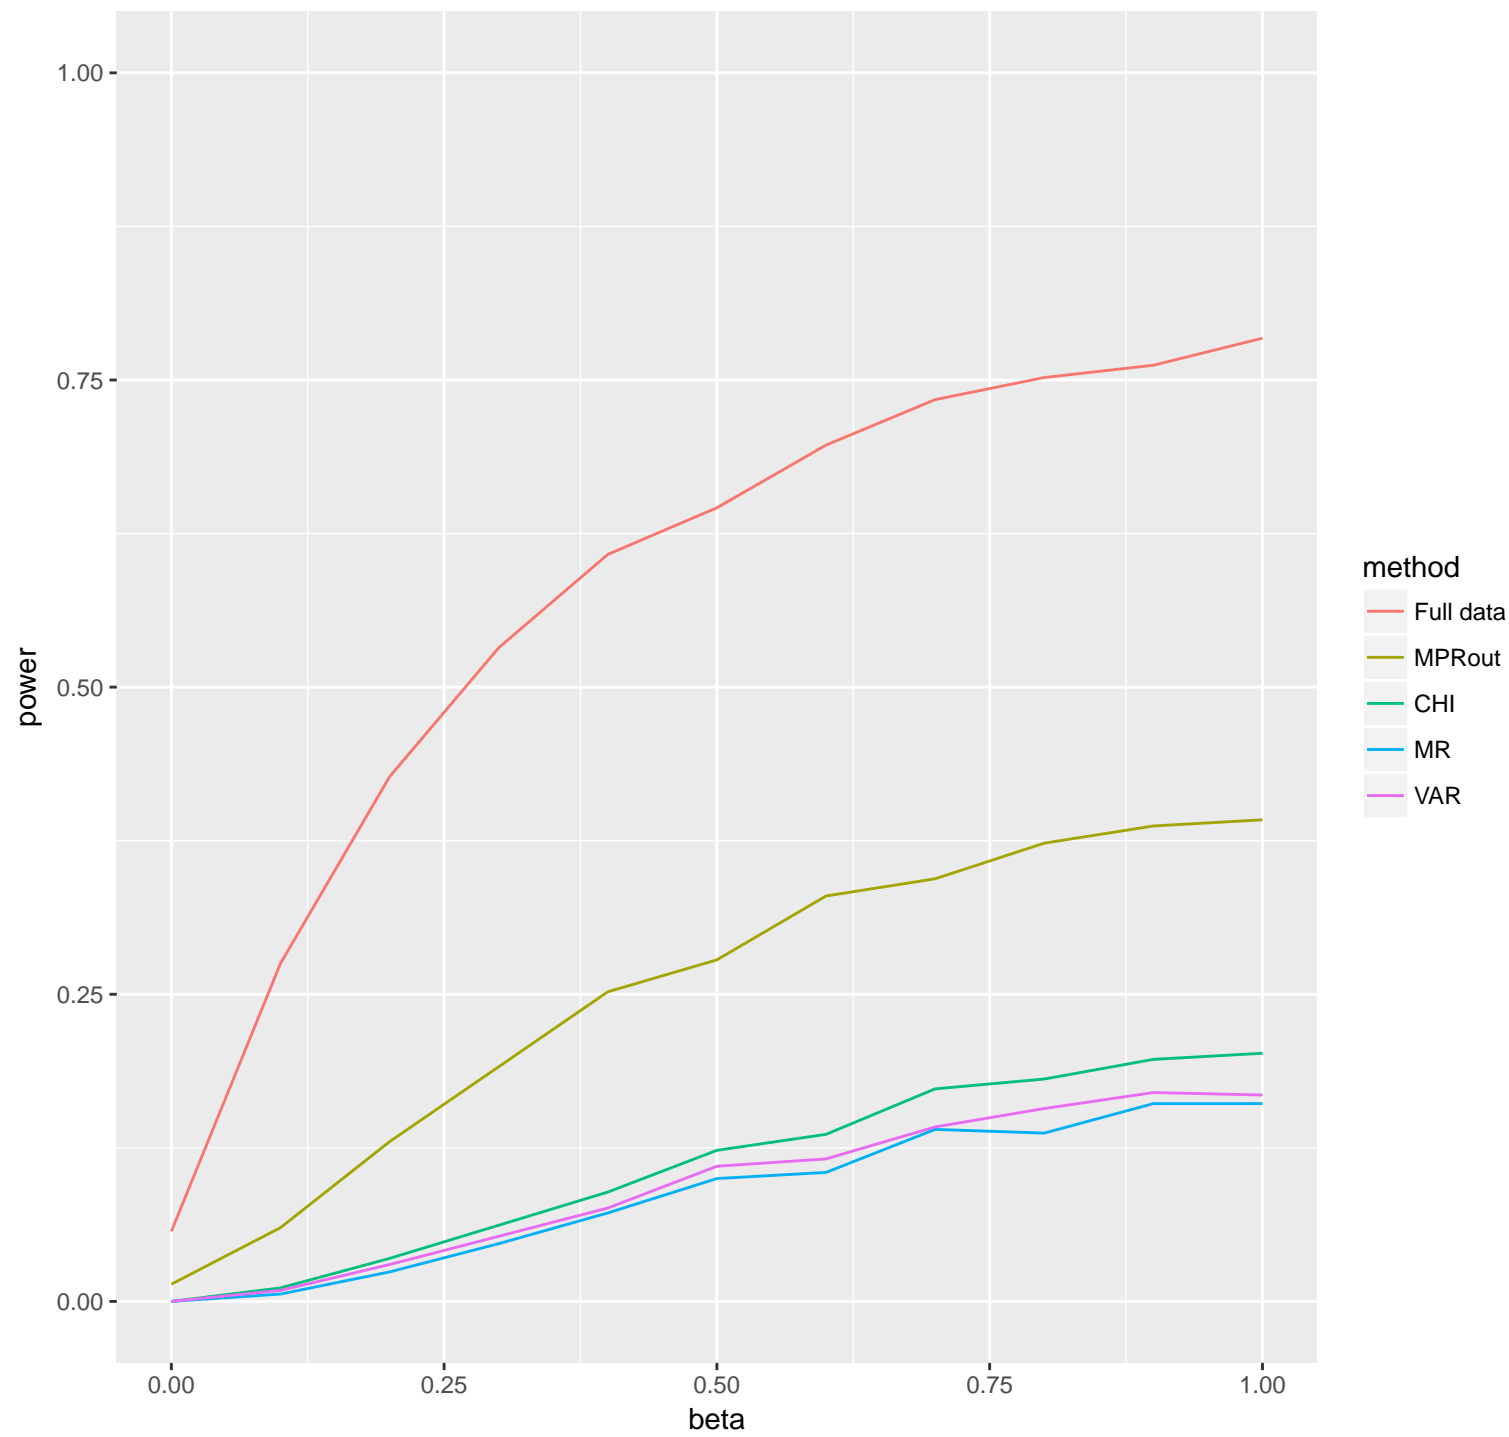

# Power for continuous variable (cor=0.8;0.4% missing)

Outcome excluded for all pooling methods

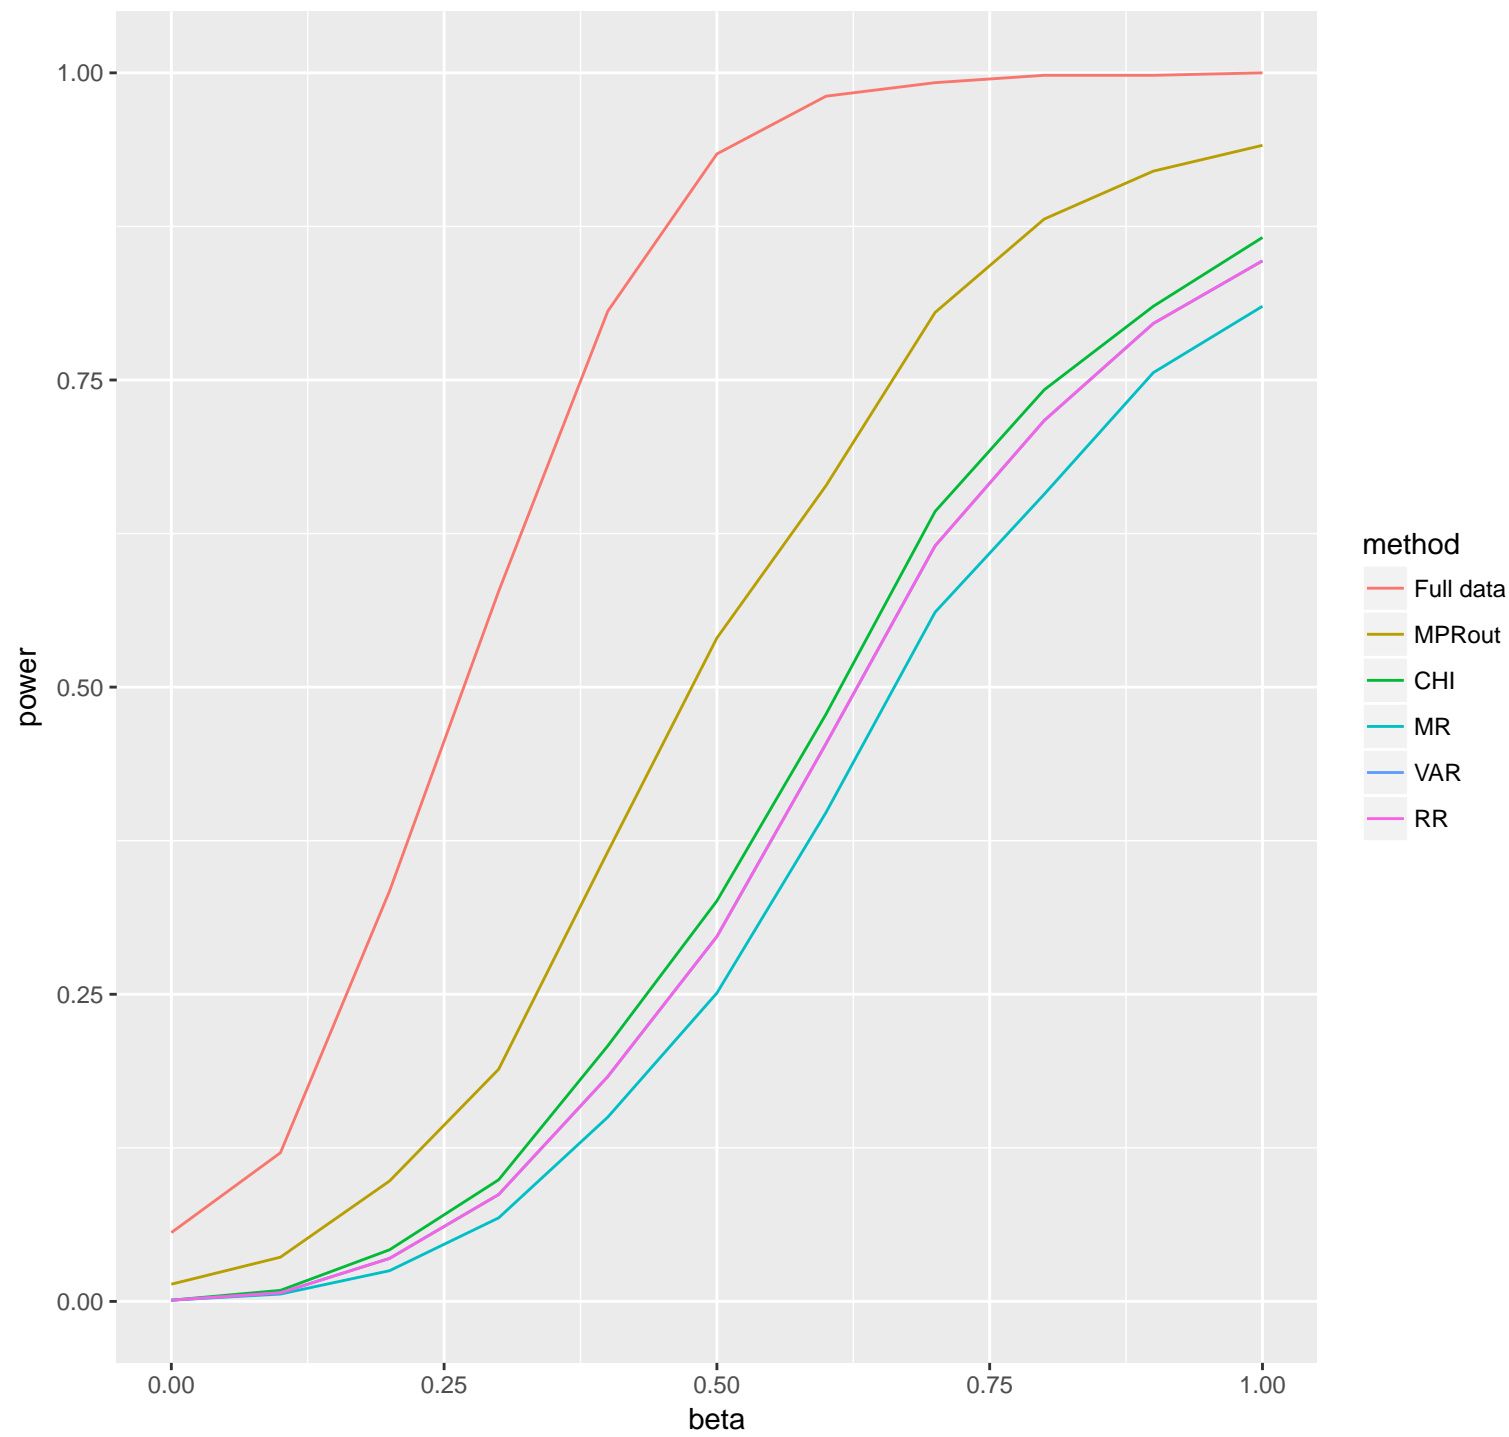

# Power for the categorical variable (cor=0.2;0.25% missing)

Outcome included for CHI, MR & VAR; excluded for MPR

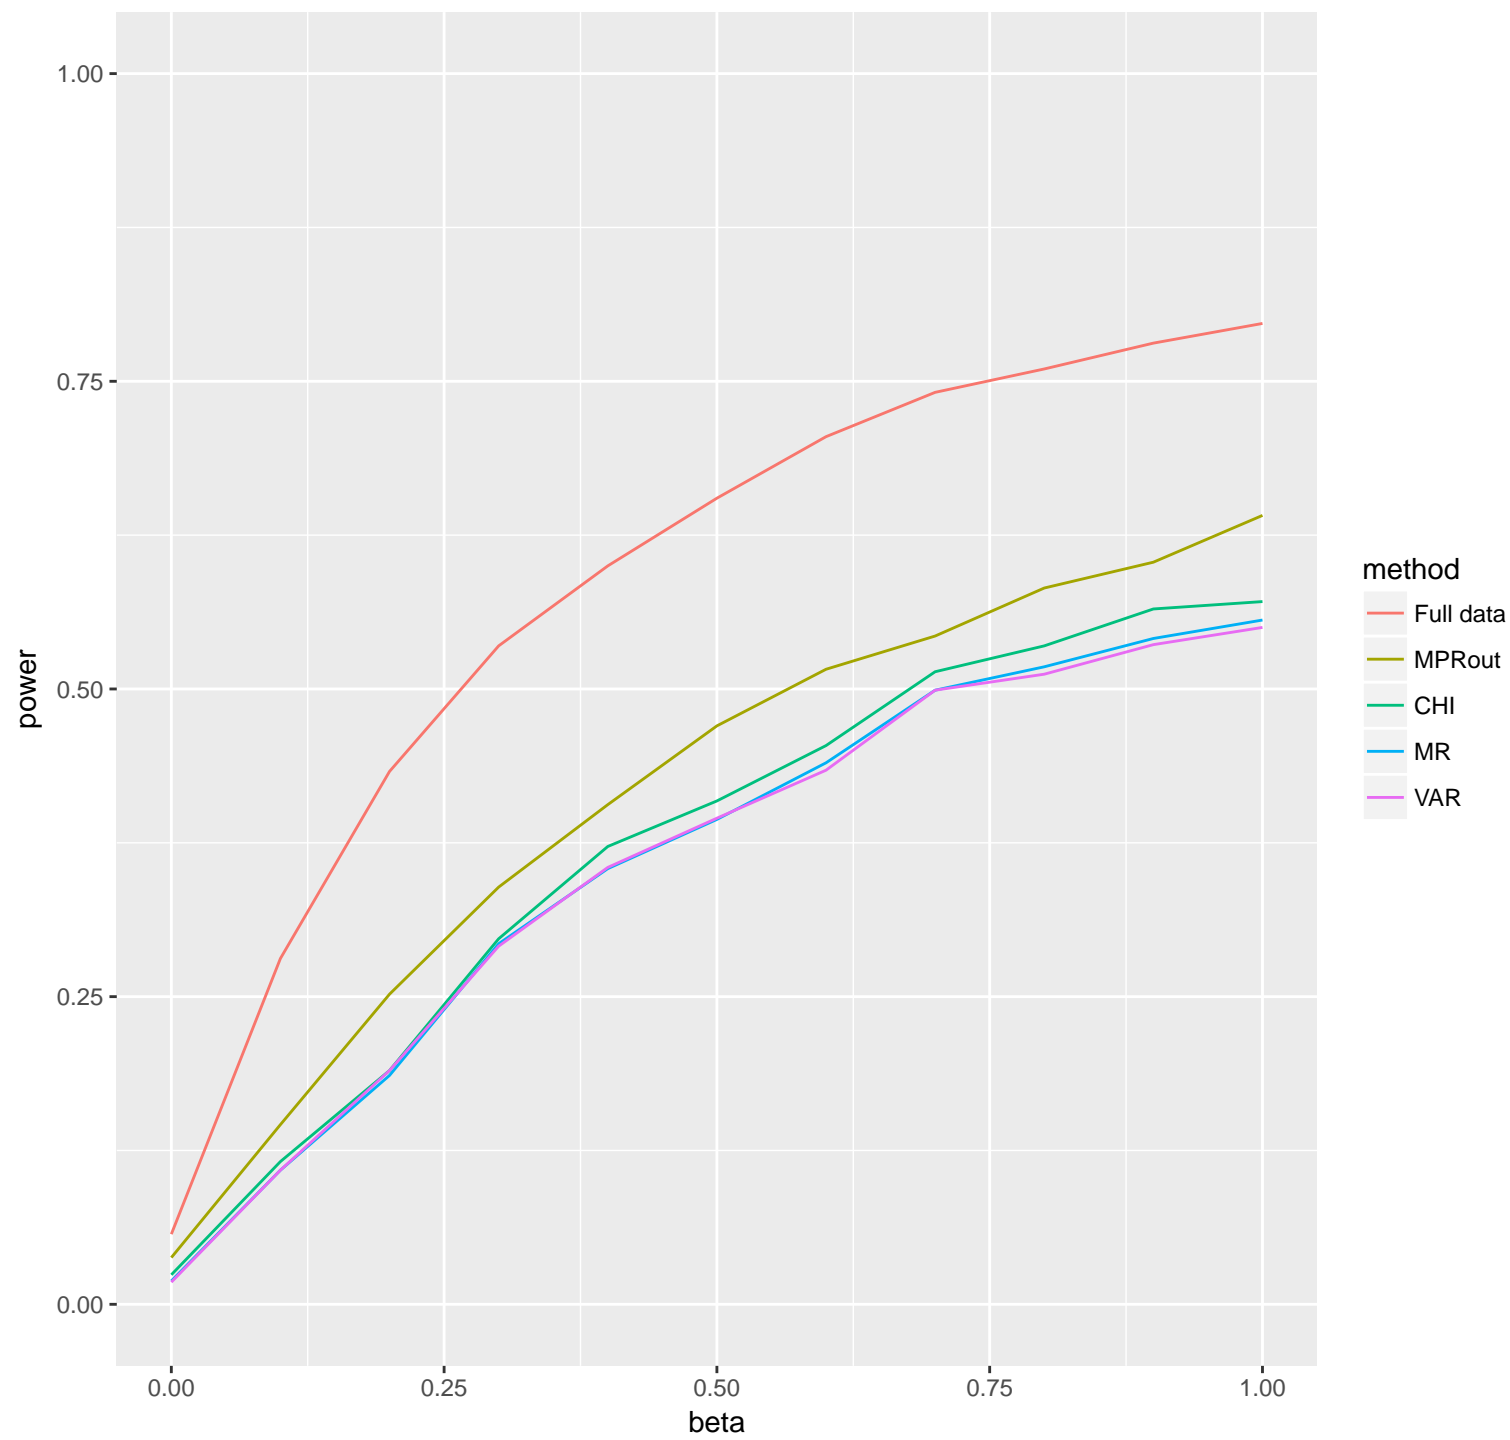

# Power for the continuous variable (cor=0.2;0.25% missing)

Outcome included for CHI, MR, VAR & RR; excluded for MPR

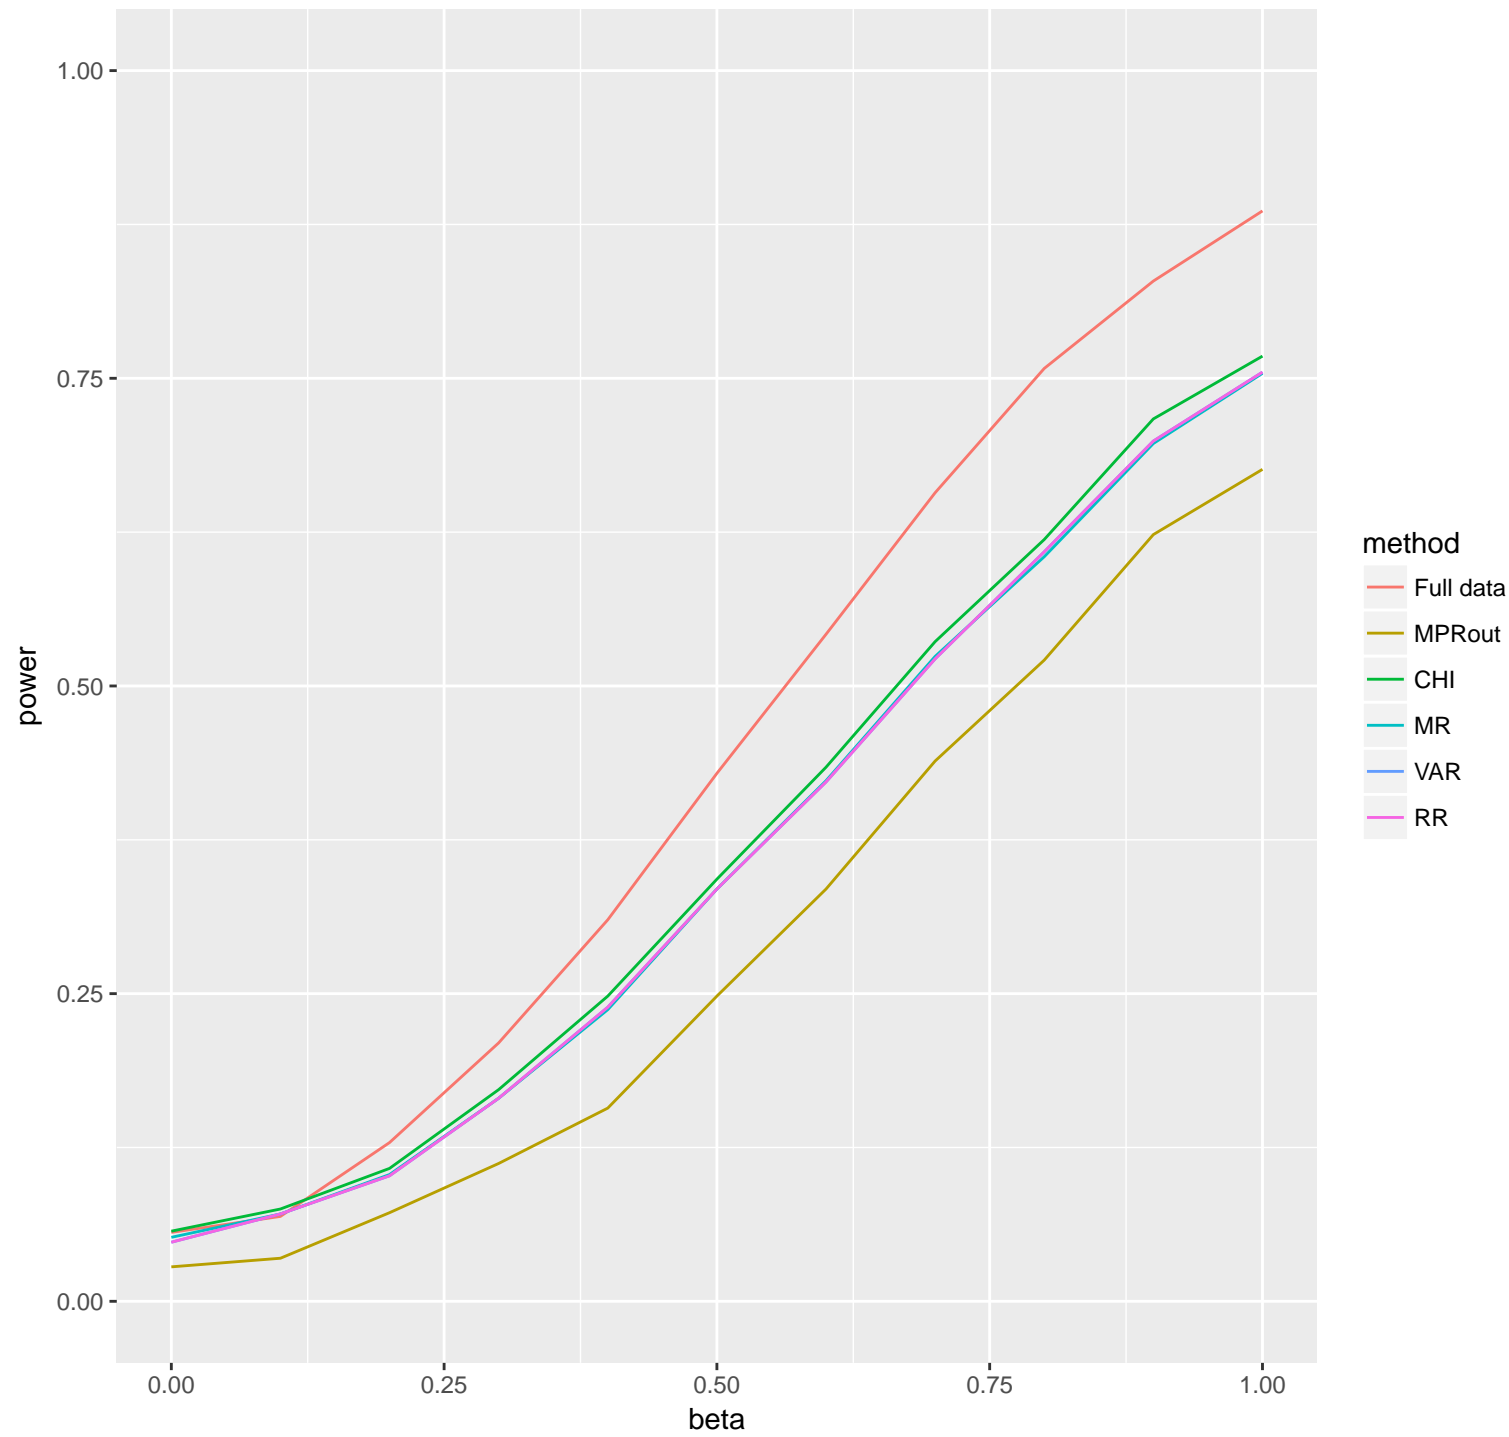

# Power for the categorical variable (cor=0.2;0.4% missing)

Outcome included for CHI, MR & VAR; excluded for MPR

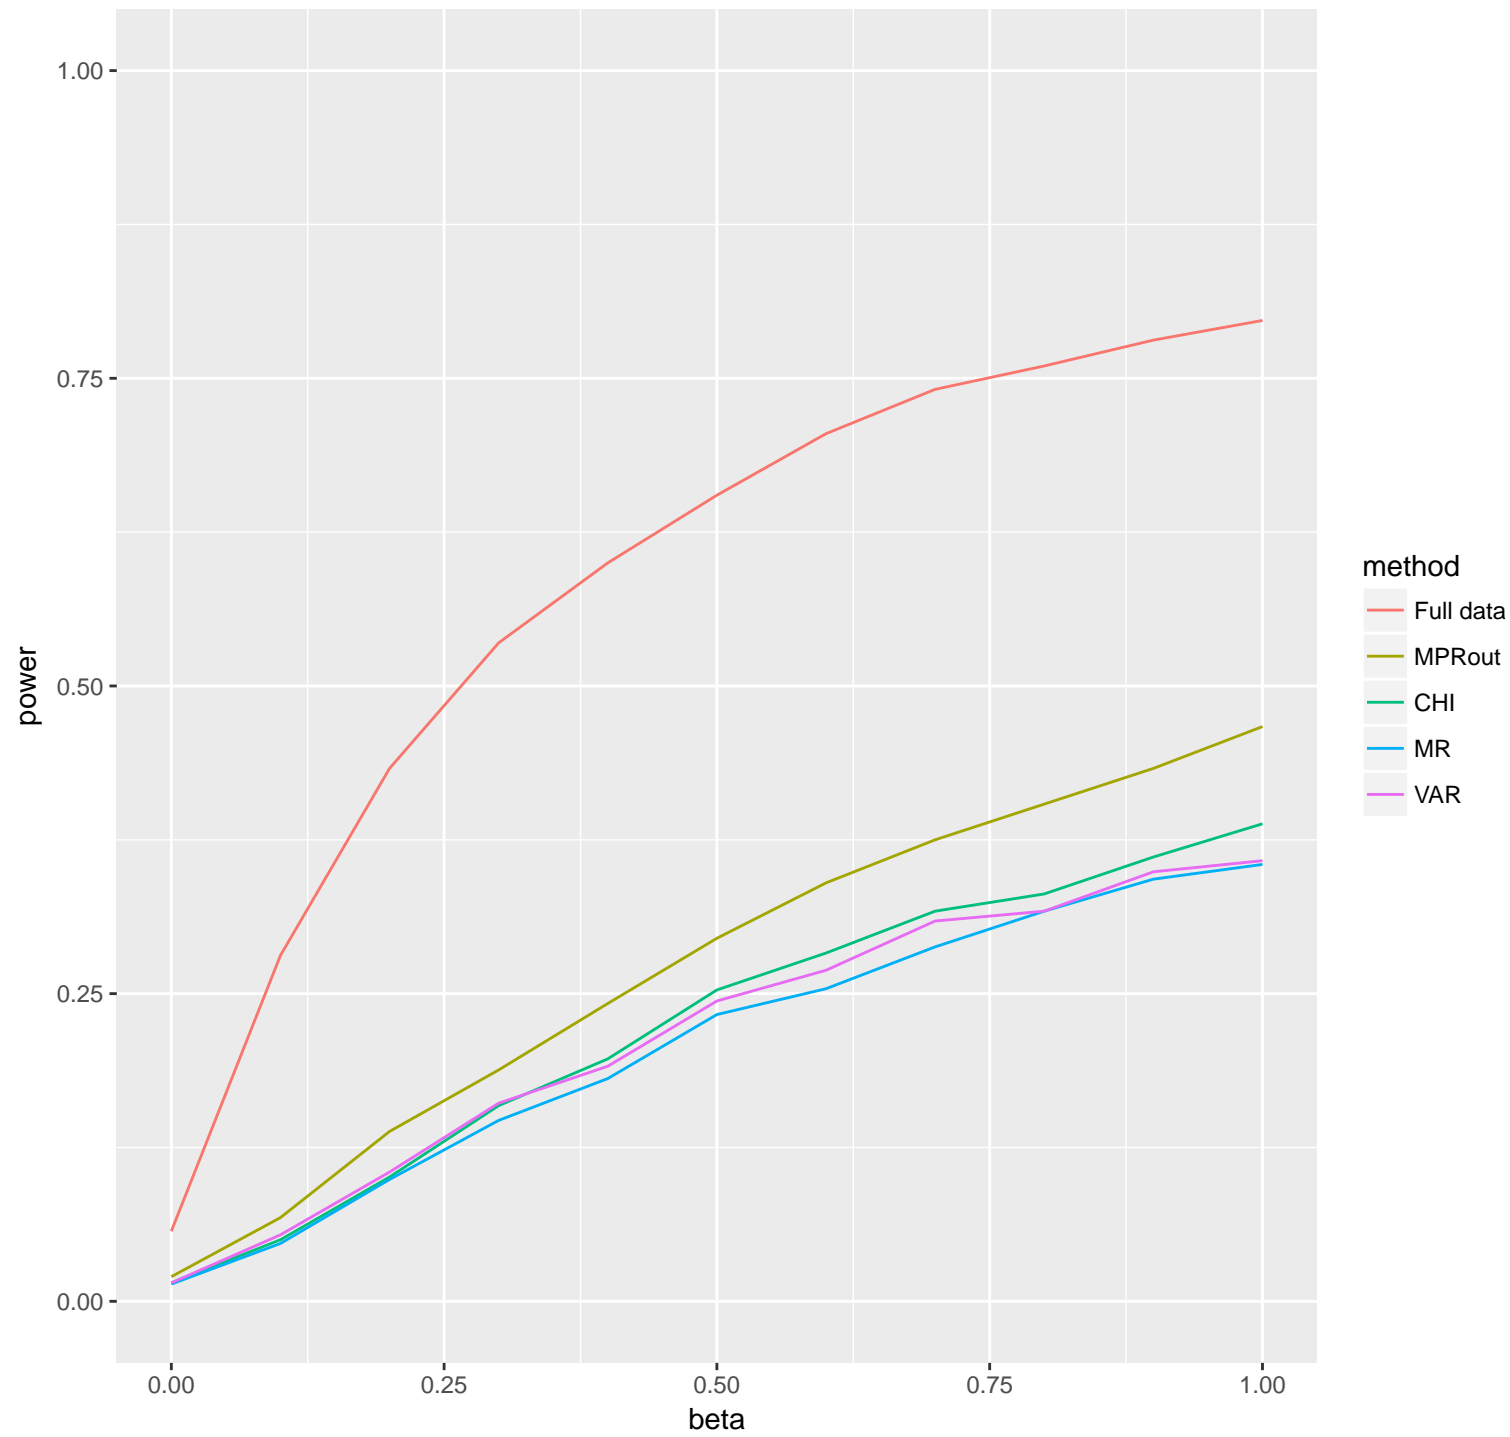

# Power for the continuous variable (cor=0.2;0.4% missing)

Outcome included for CHI, MR, VAR & RR; excluded for MPR

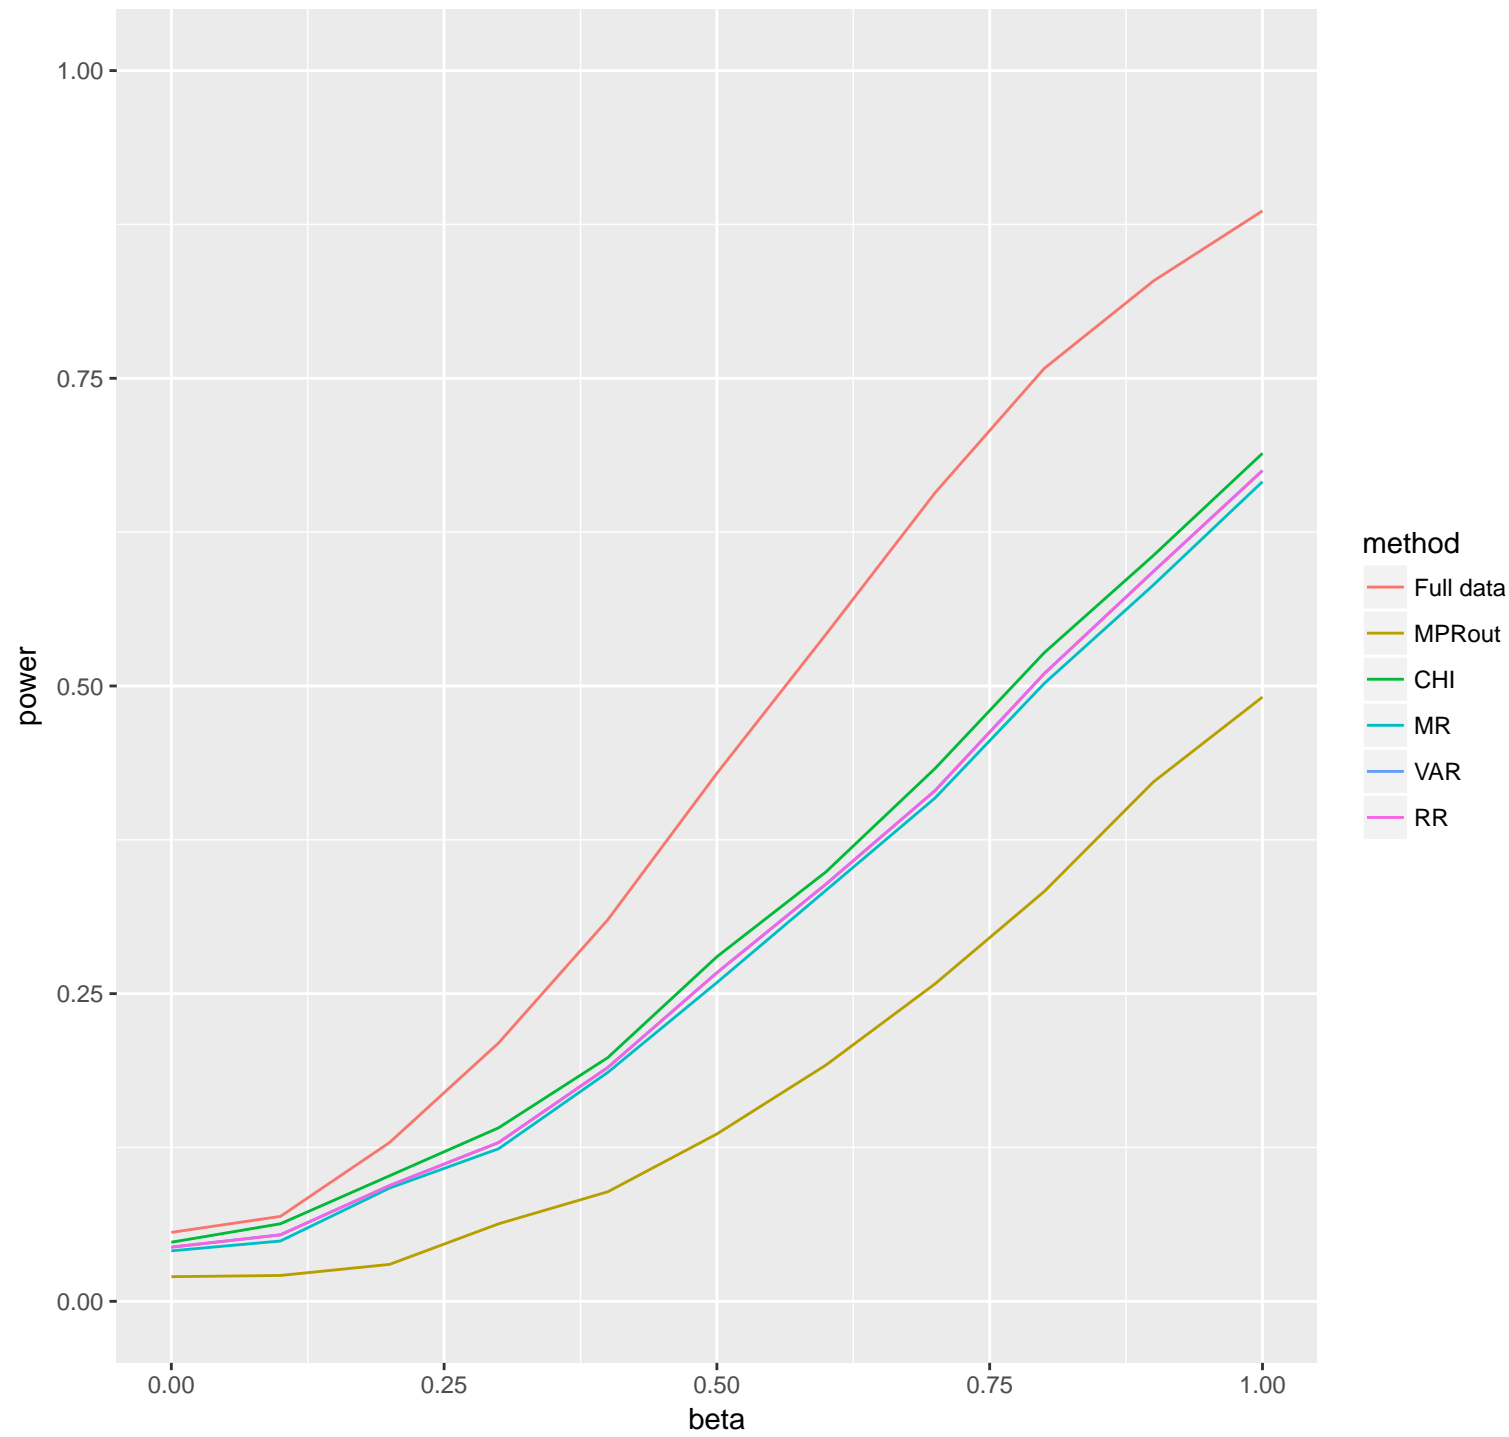



# Power for the categorical variable (cor=0.4;0.25% missing)

Outcome included for CHI, MR & VAR; excluded for MPR

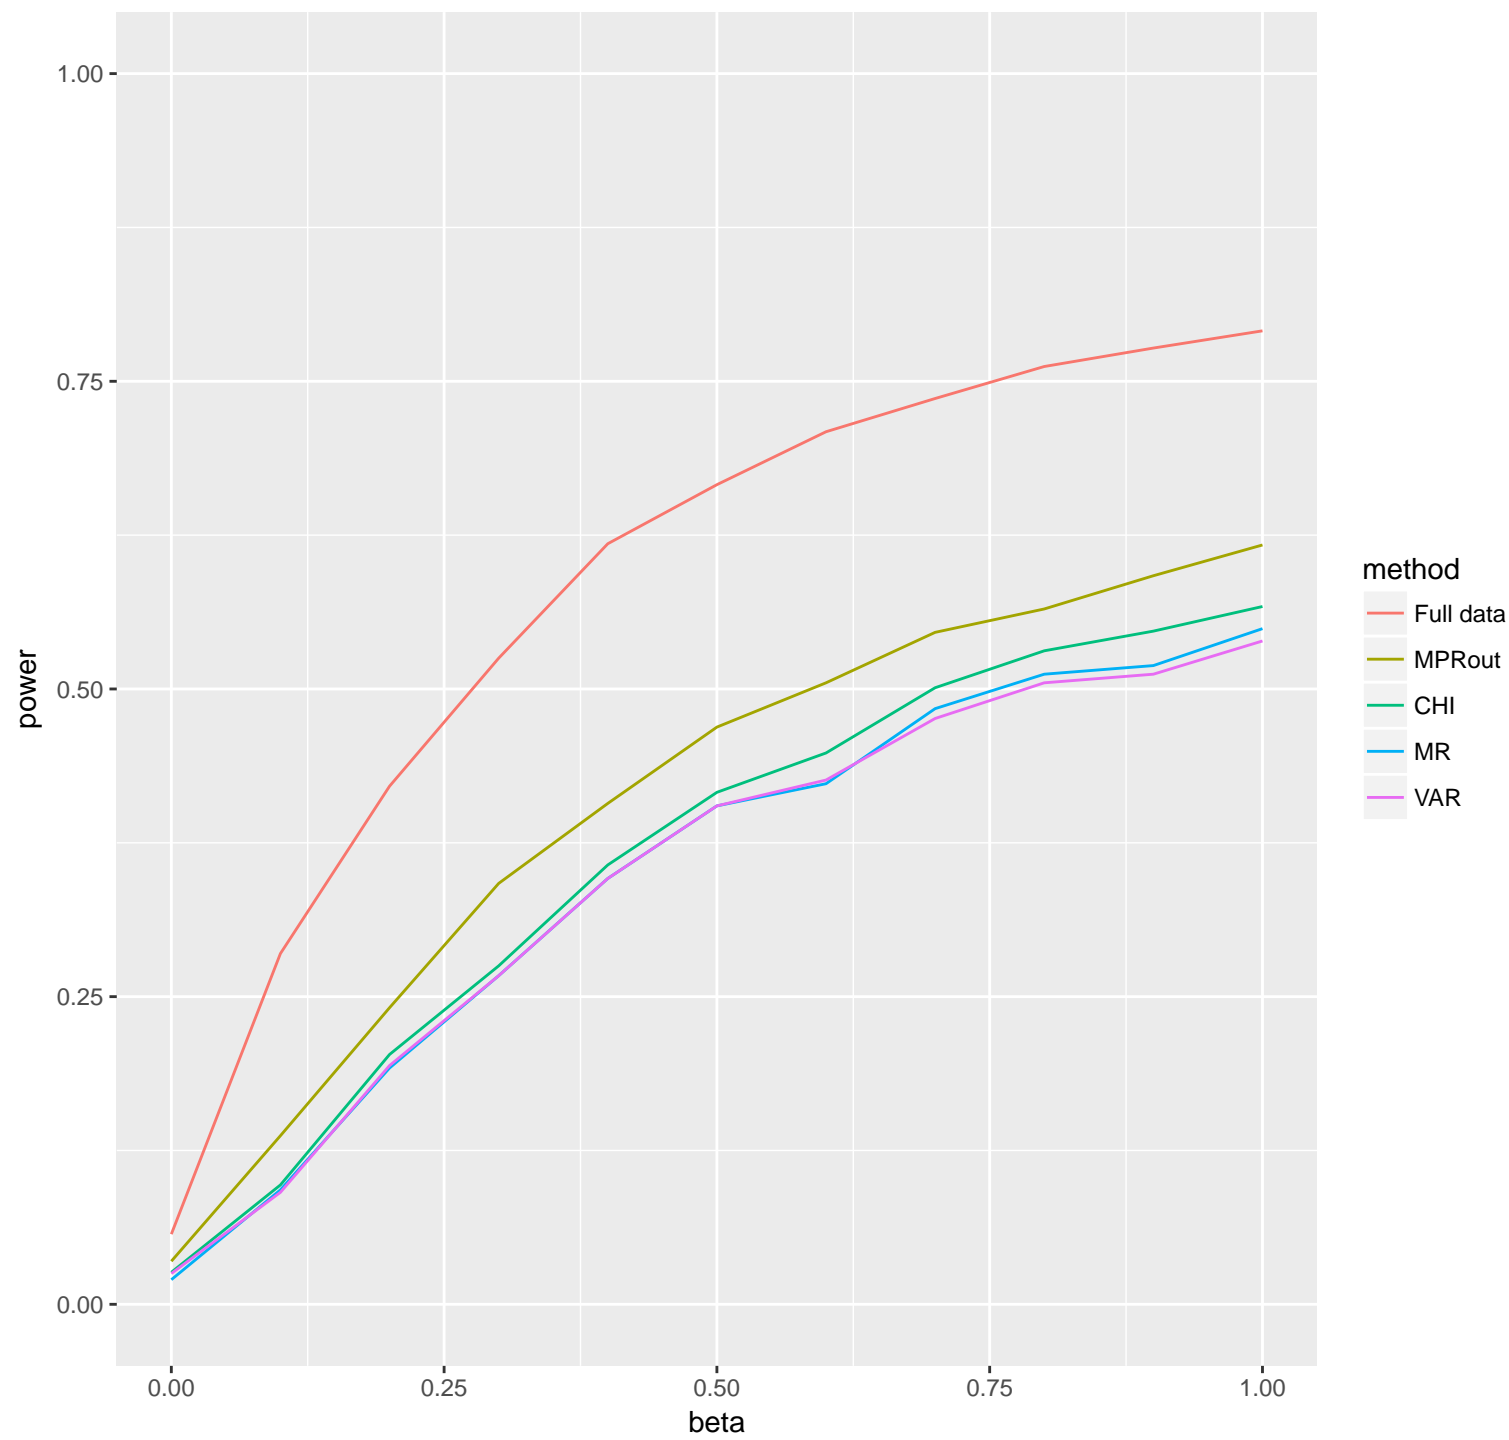

# Power for the continuous variable (cor=0.4;0.25% missing)

Outcome included for CHI, MR, VAR & RR; excluded for MPR

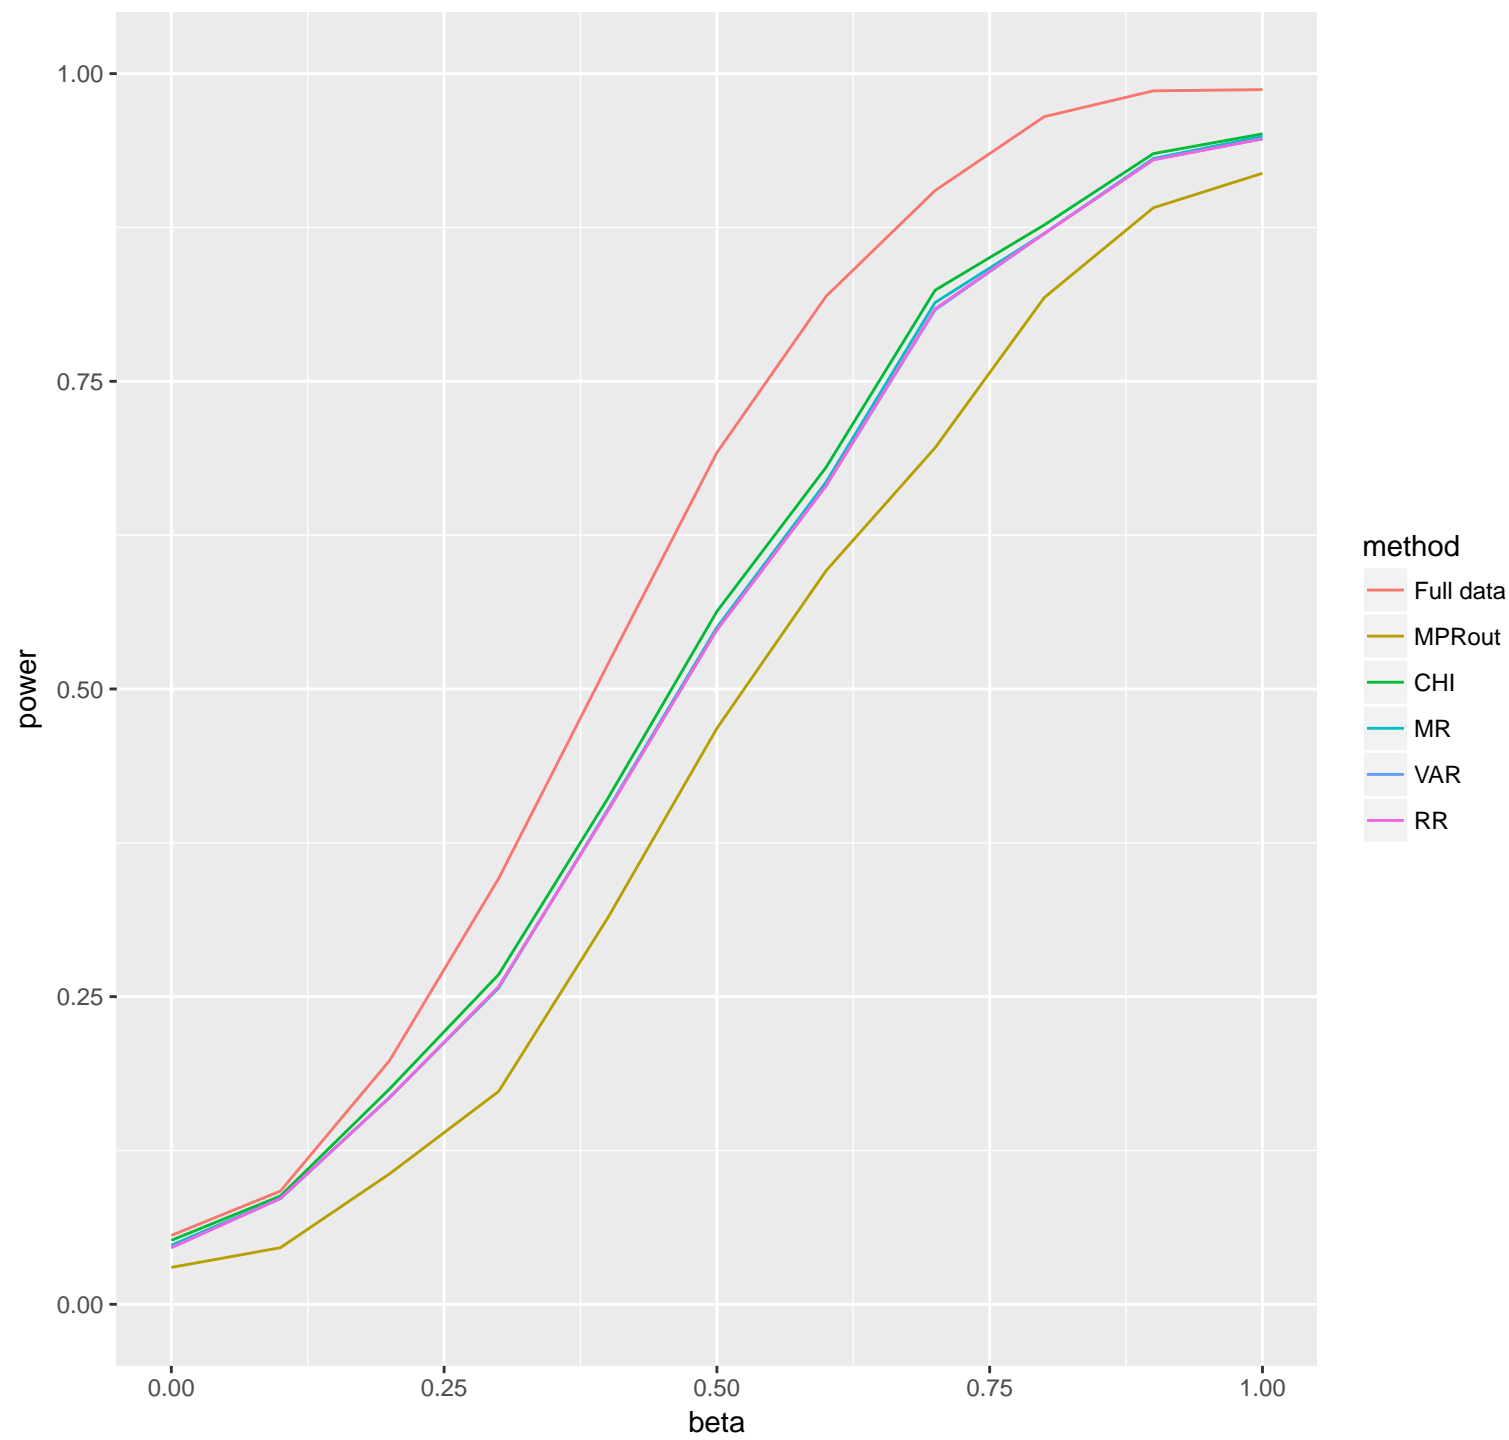

# Power for the categorical variable (cor=0.4;0.4% missing)

Outcome included for CHI, MR & VAR; excluded for MPR

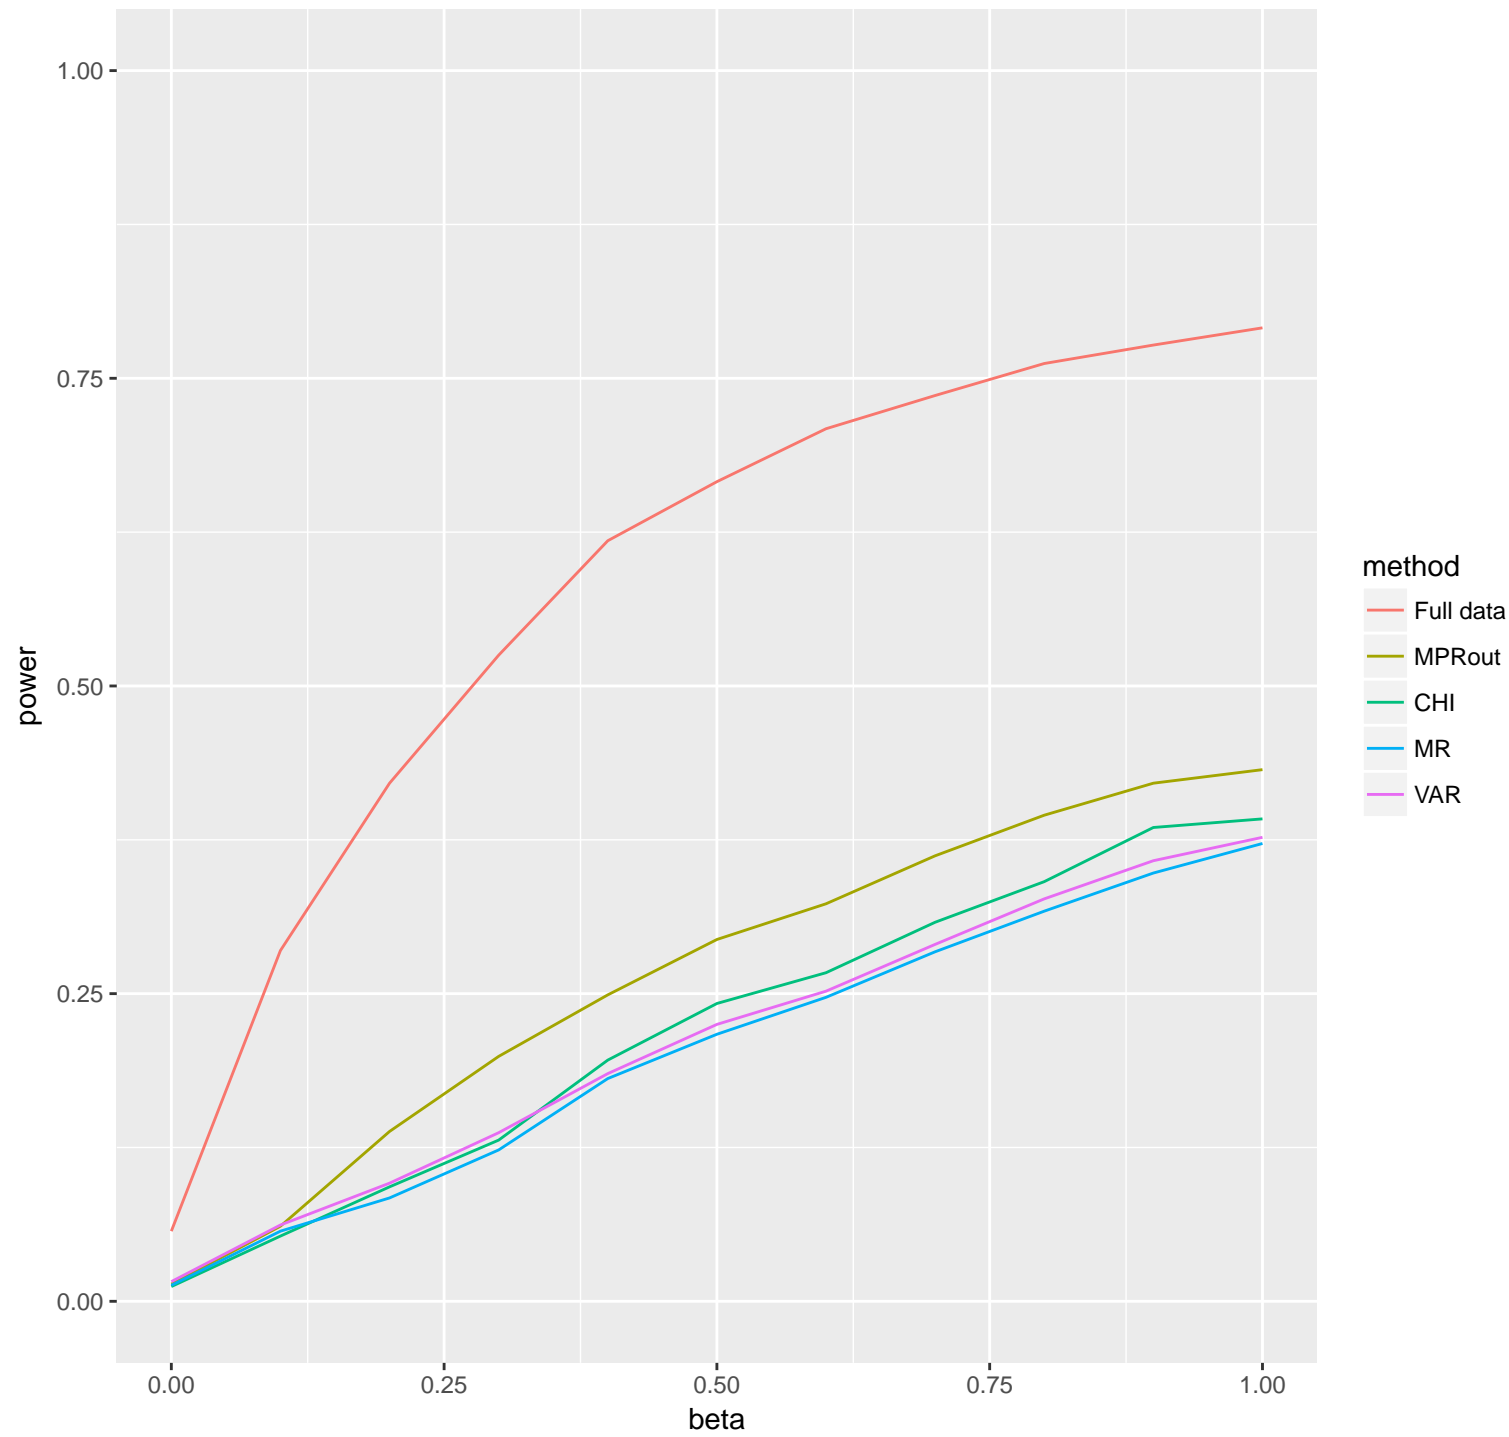

# Power for the continuous variable (cor=0.4;0.4% missing)

Outcome included for CHI, MR, VAR & RR; excluded for MPR

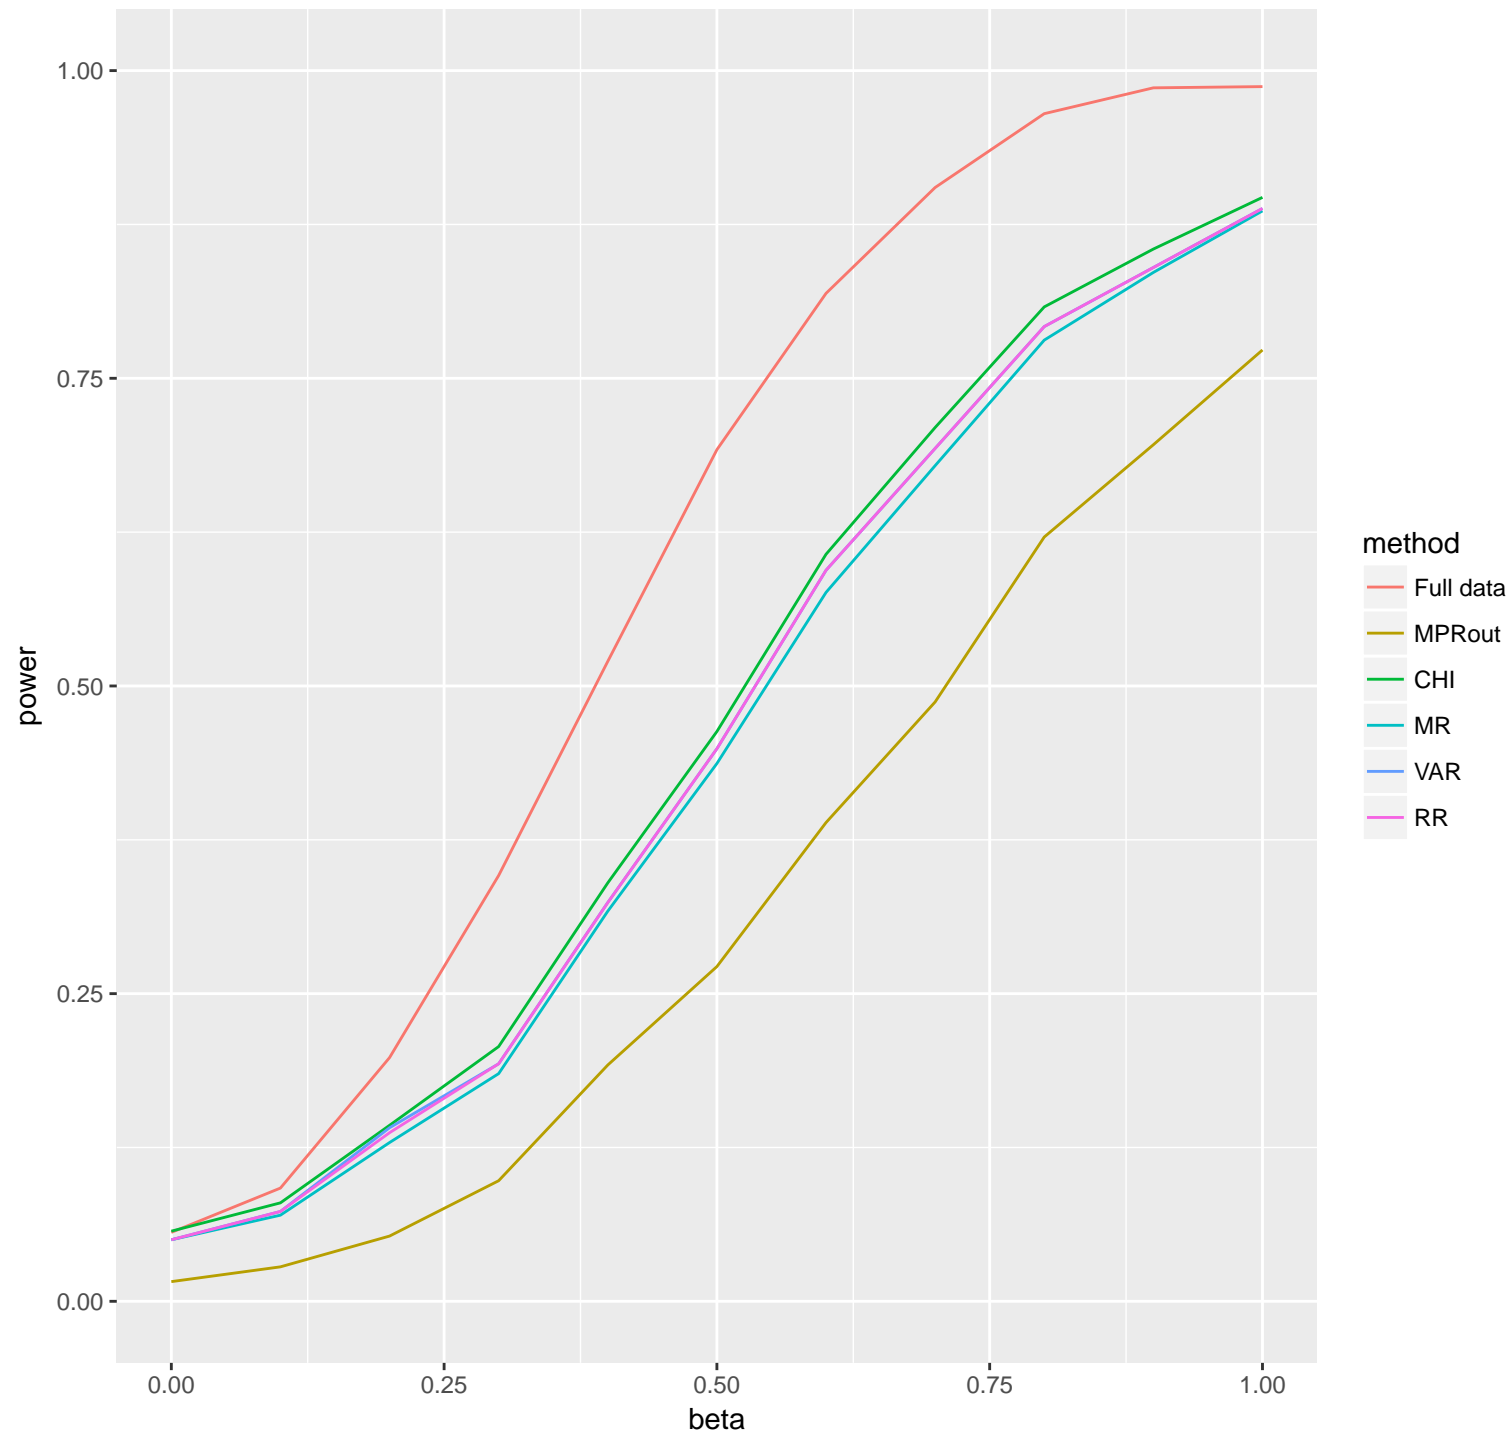

# Power for the categorical variable (cor=0.6;0.25% missing)

Outcome included for CHI, MR & VAR; excluded for MPR

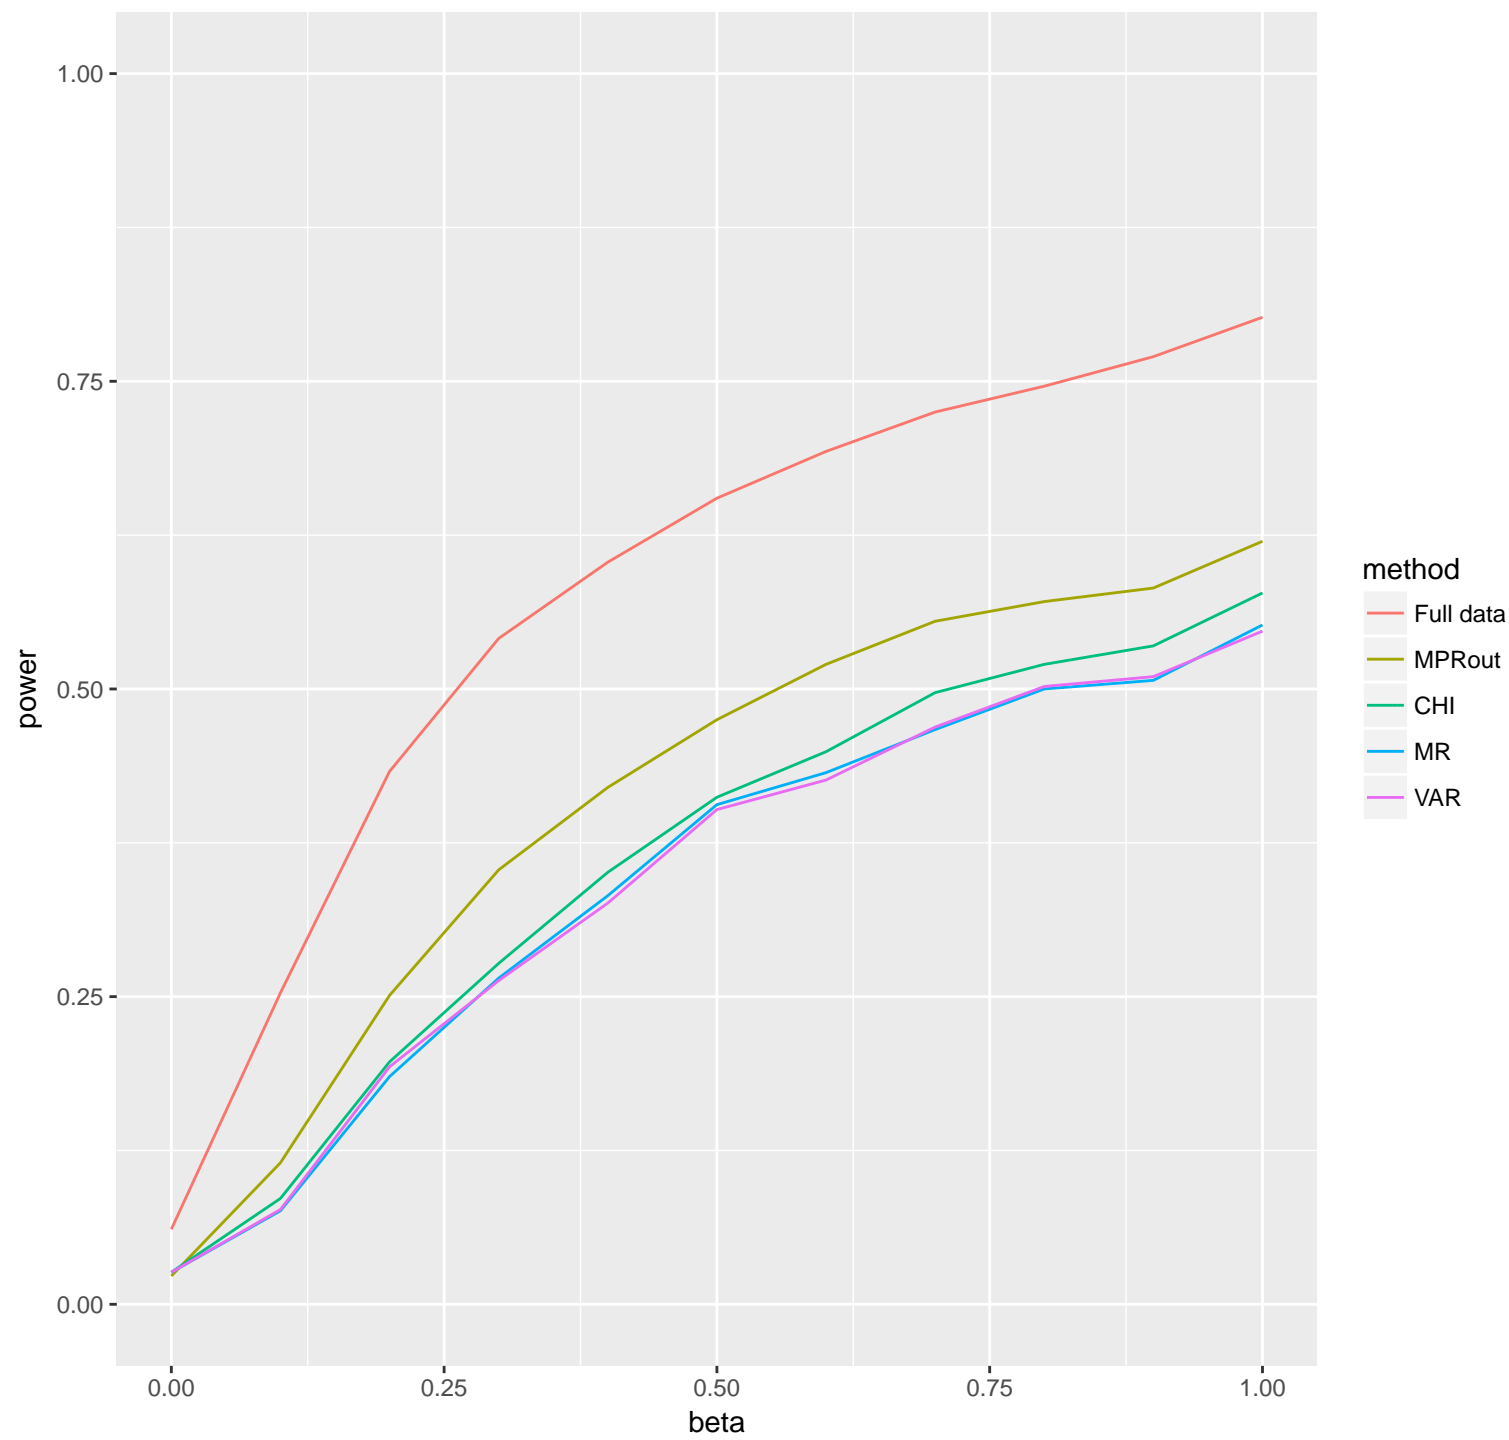

# Power for the continuous variable (cor=0.6;0.25% missing)

Outcome included for CHI, MR, VAR & RR; excluded for MPR

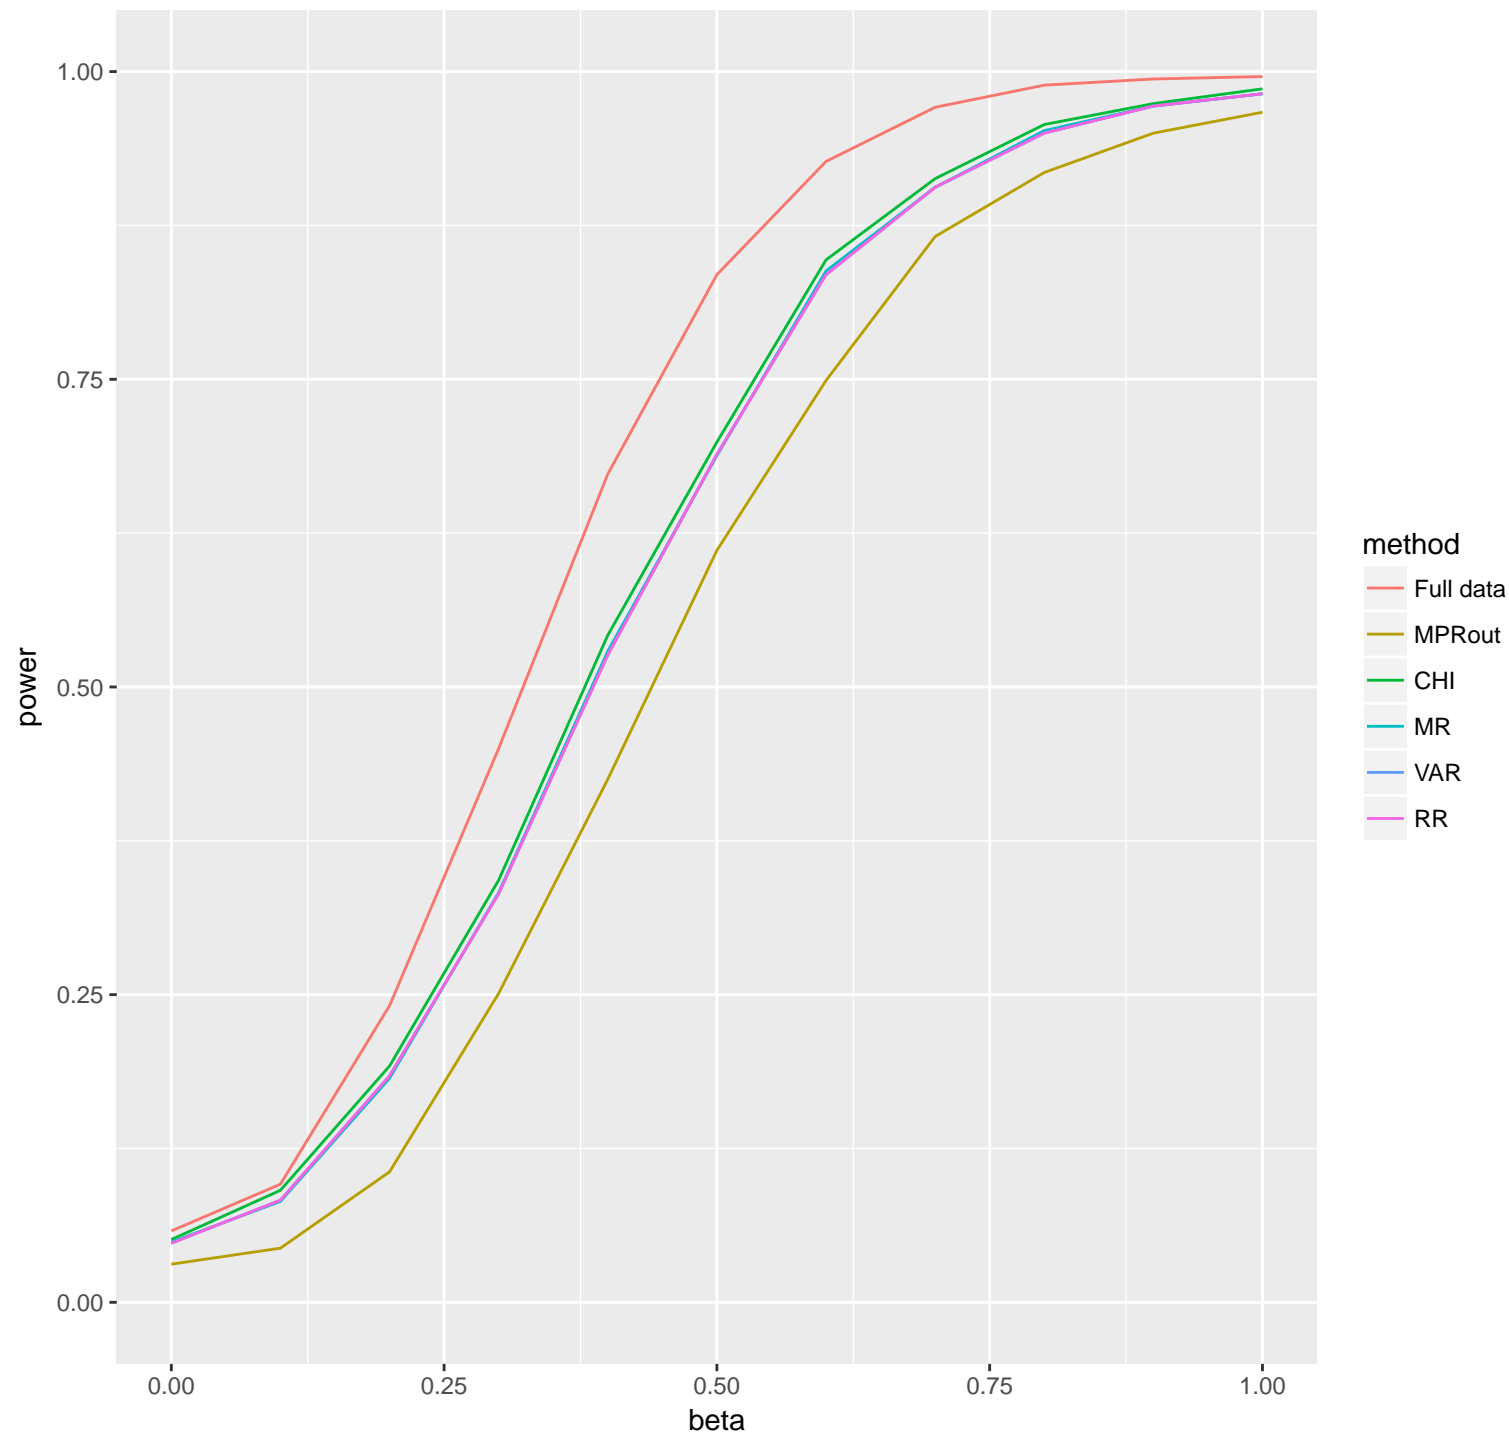

# Power for the categorical variable (cor=0.6;0.4% missing)

Outcome included for CHI, MR & VAR; excluded for MPR

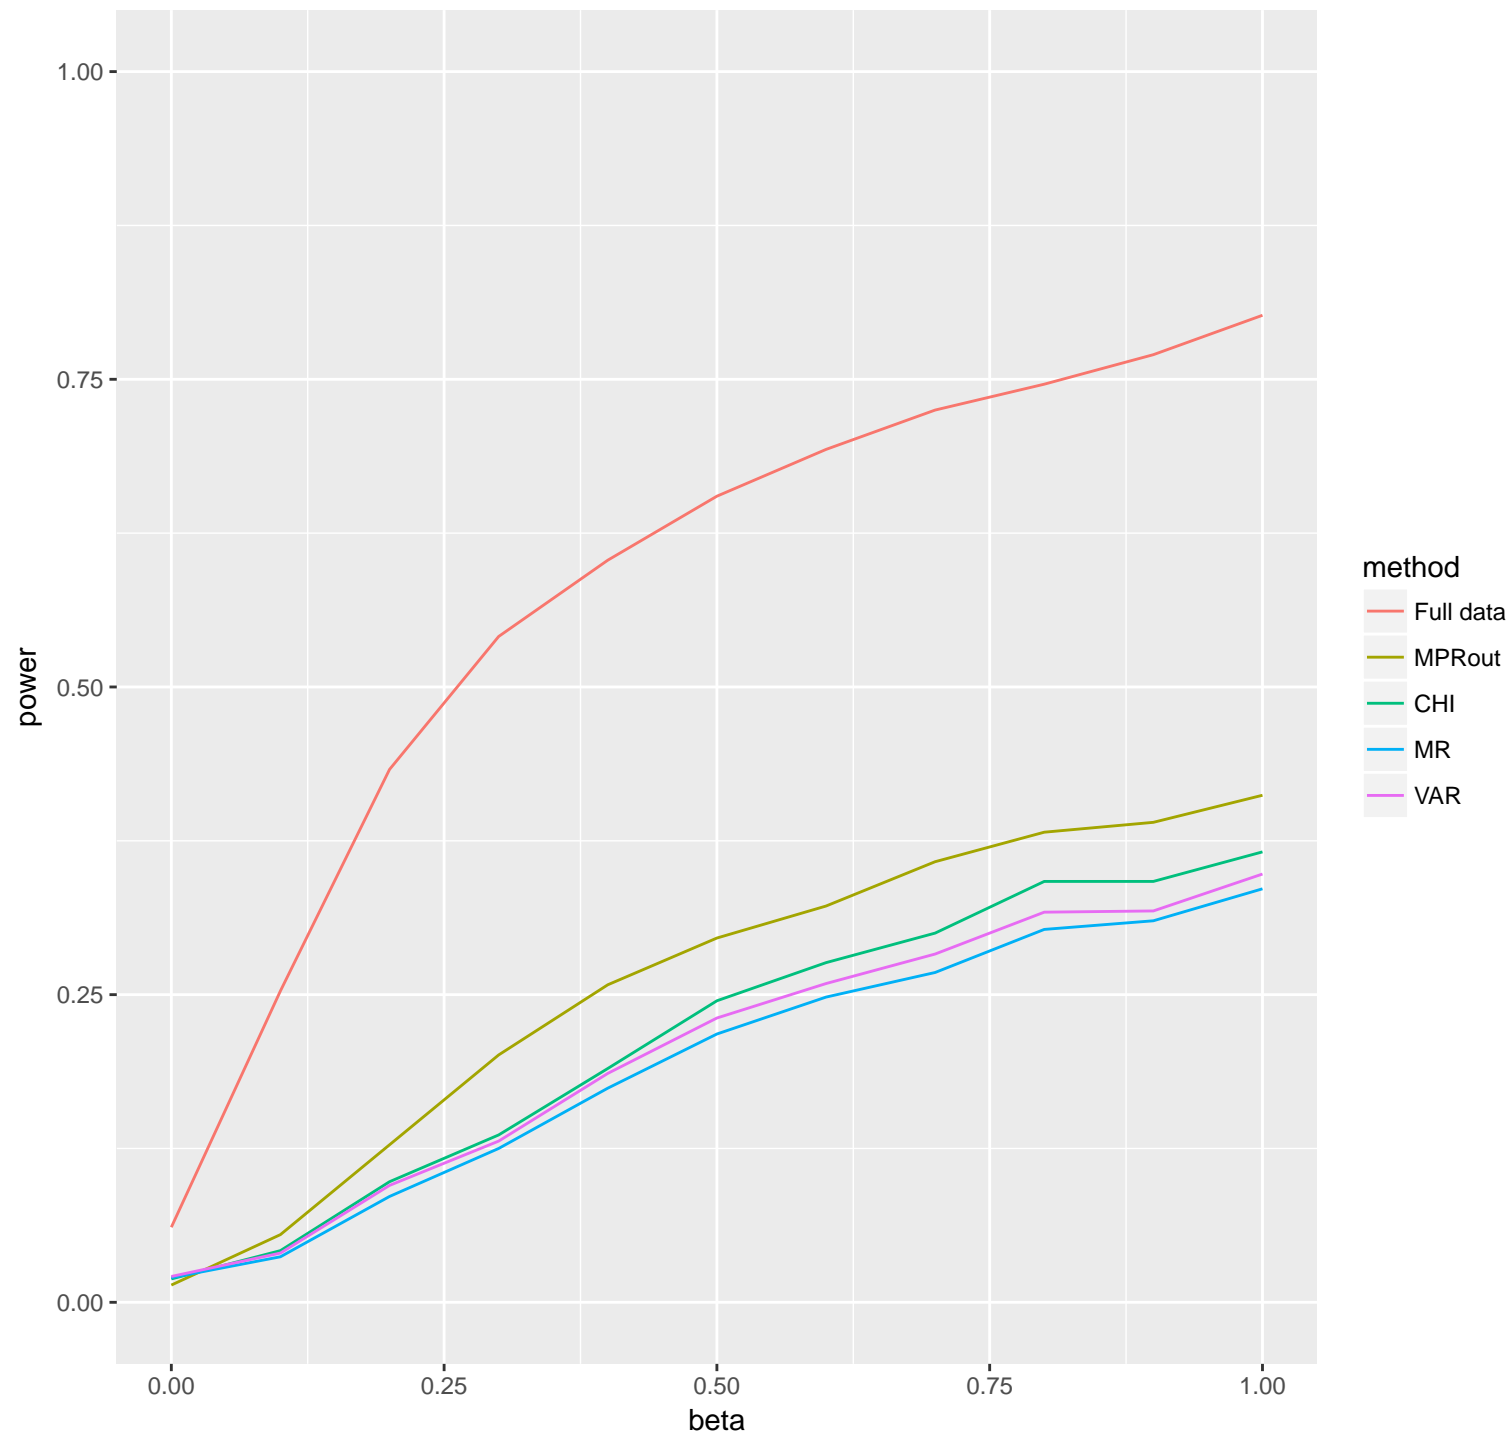

# Power for the continuous variable (cor=0.6;0.4% missing)

Outcome included for CHI, MR, VAR & RR; excluded for MPR

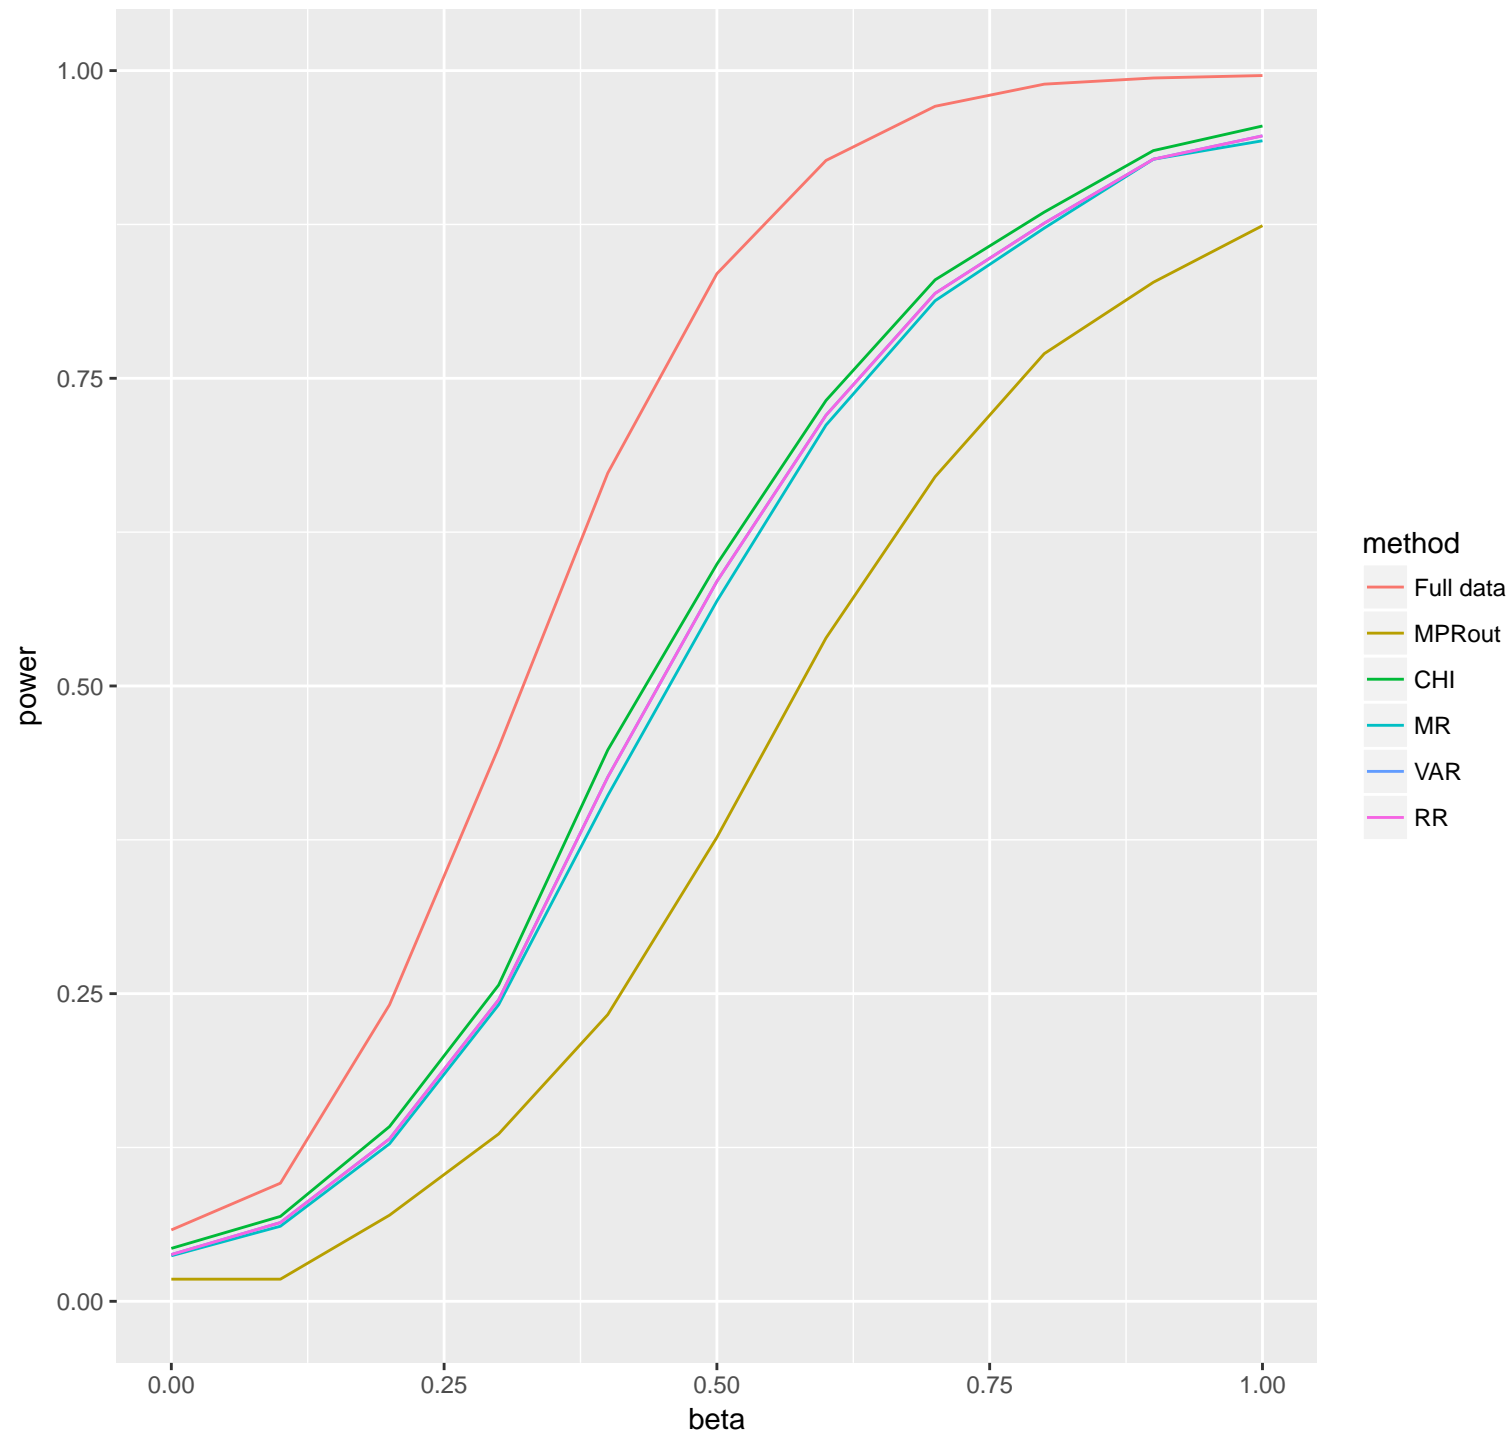



# Power for the categorical variable (cor=0.8;0.25% missing)

Outcome included for CHI, MR & VAR; excluded for MPR

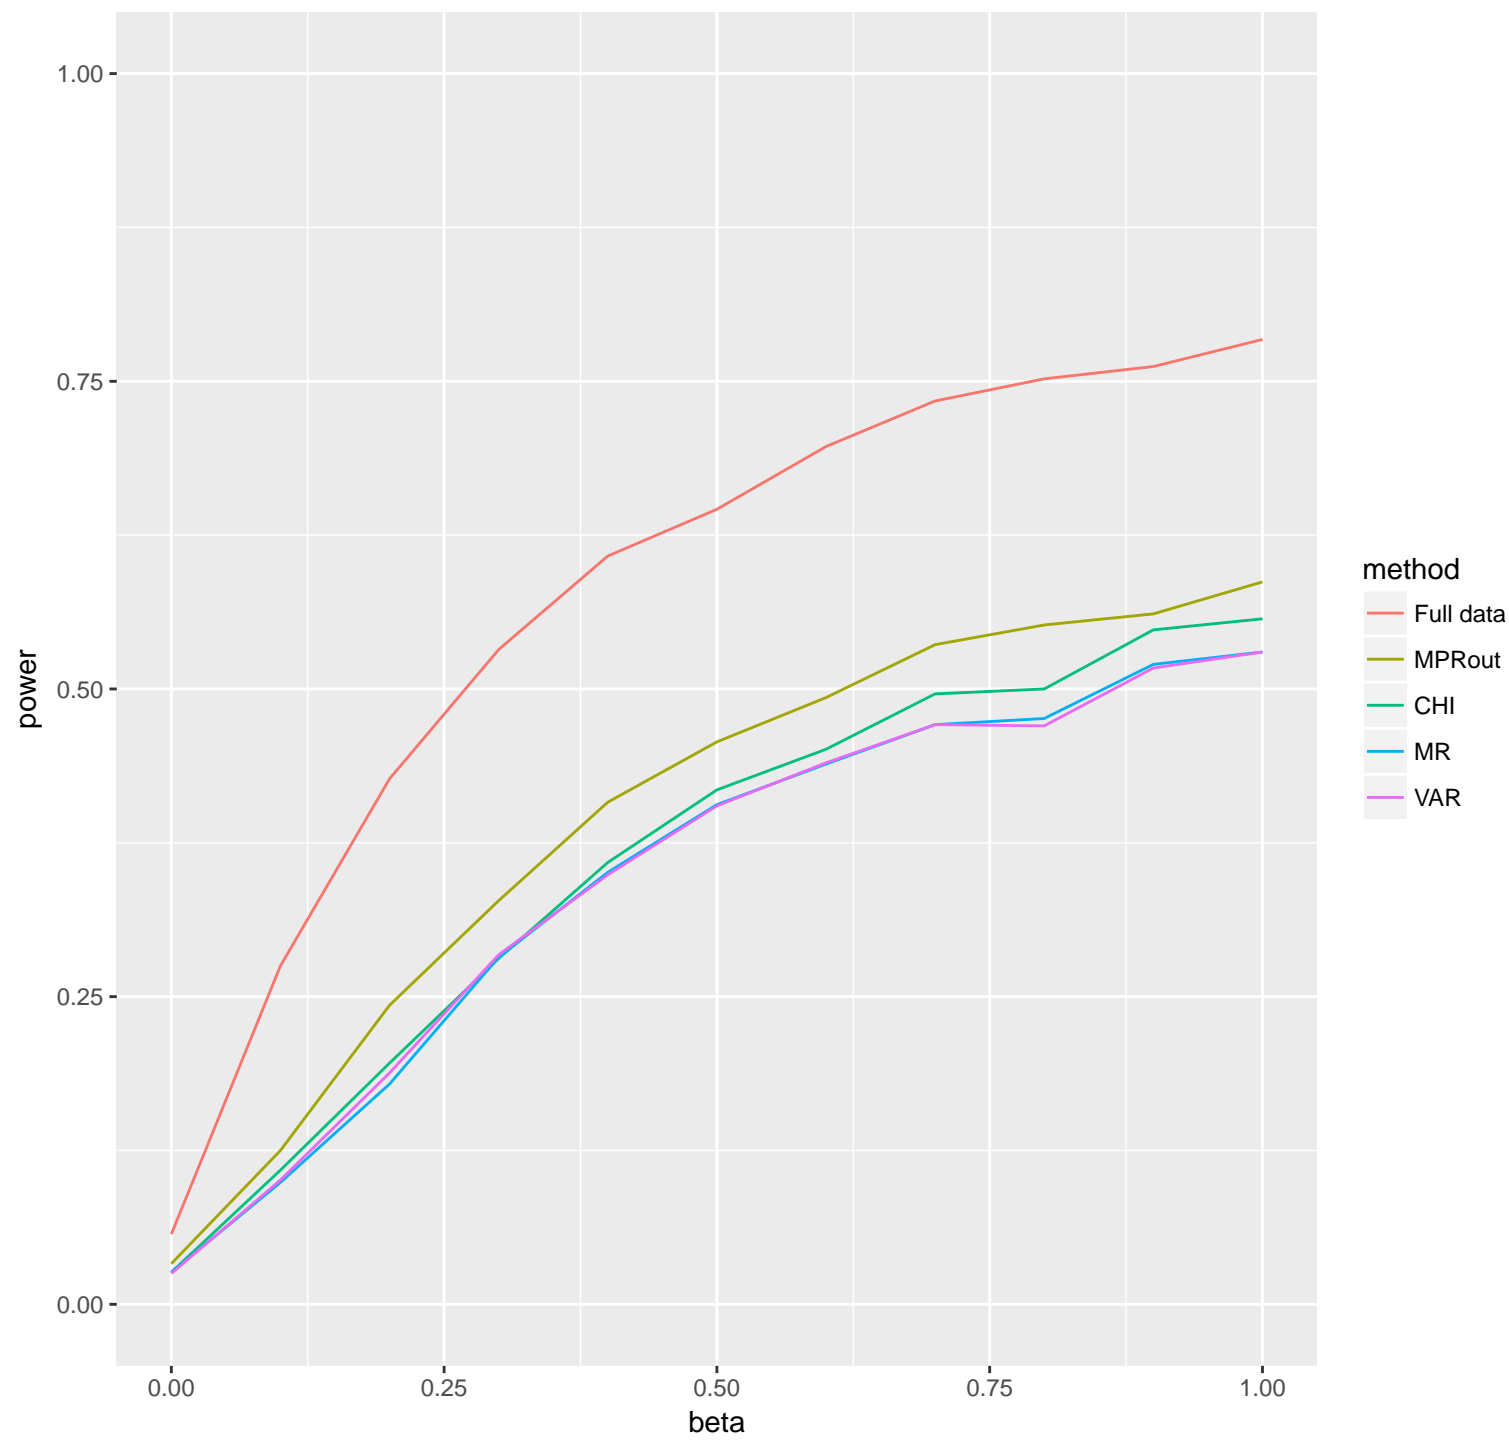



# Power for the categorical variable (cor=0.8;0.4% missing)

Outcome included for CHI, MR & VAR; excluded for MPR

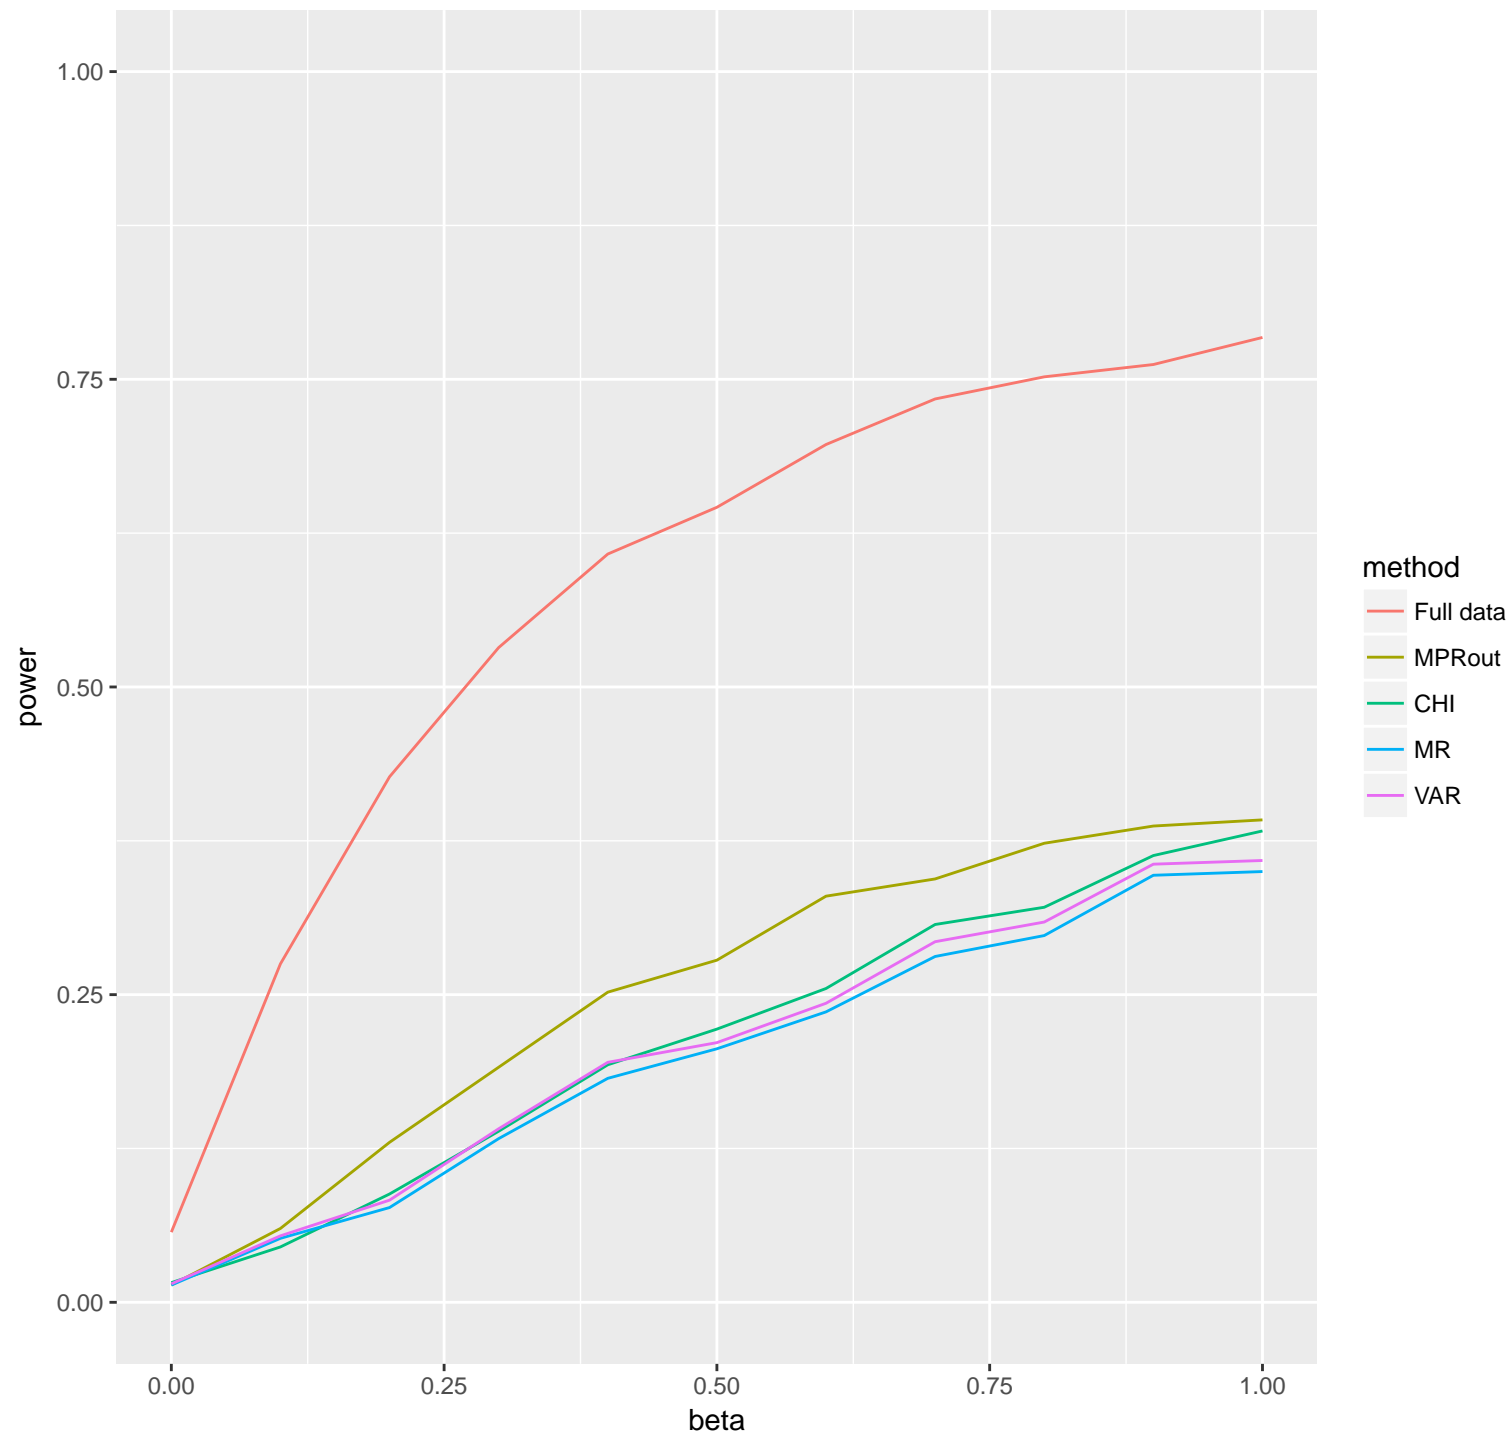

# Power for the continuous variable (cor=0.8;0.4% missing)

Outcome included for CHI, MR, VAR & RR; excluded for MPR

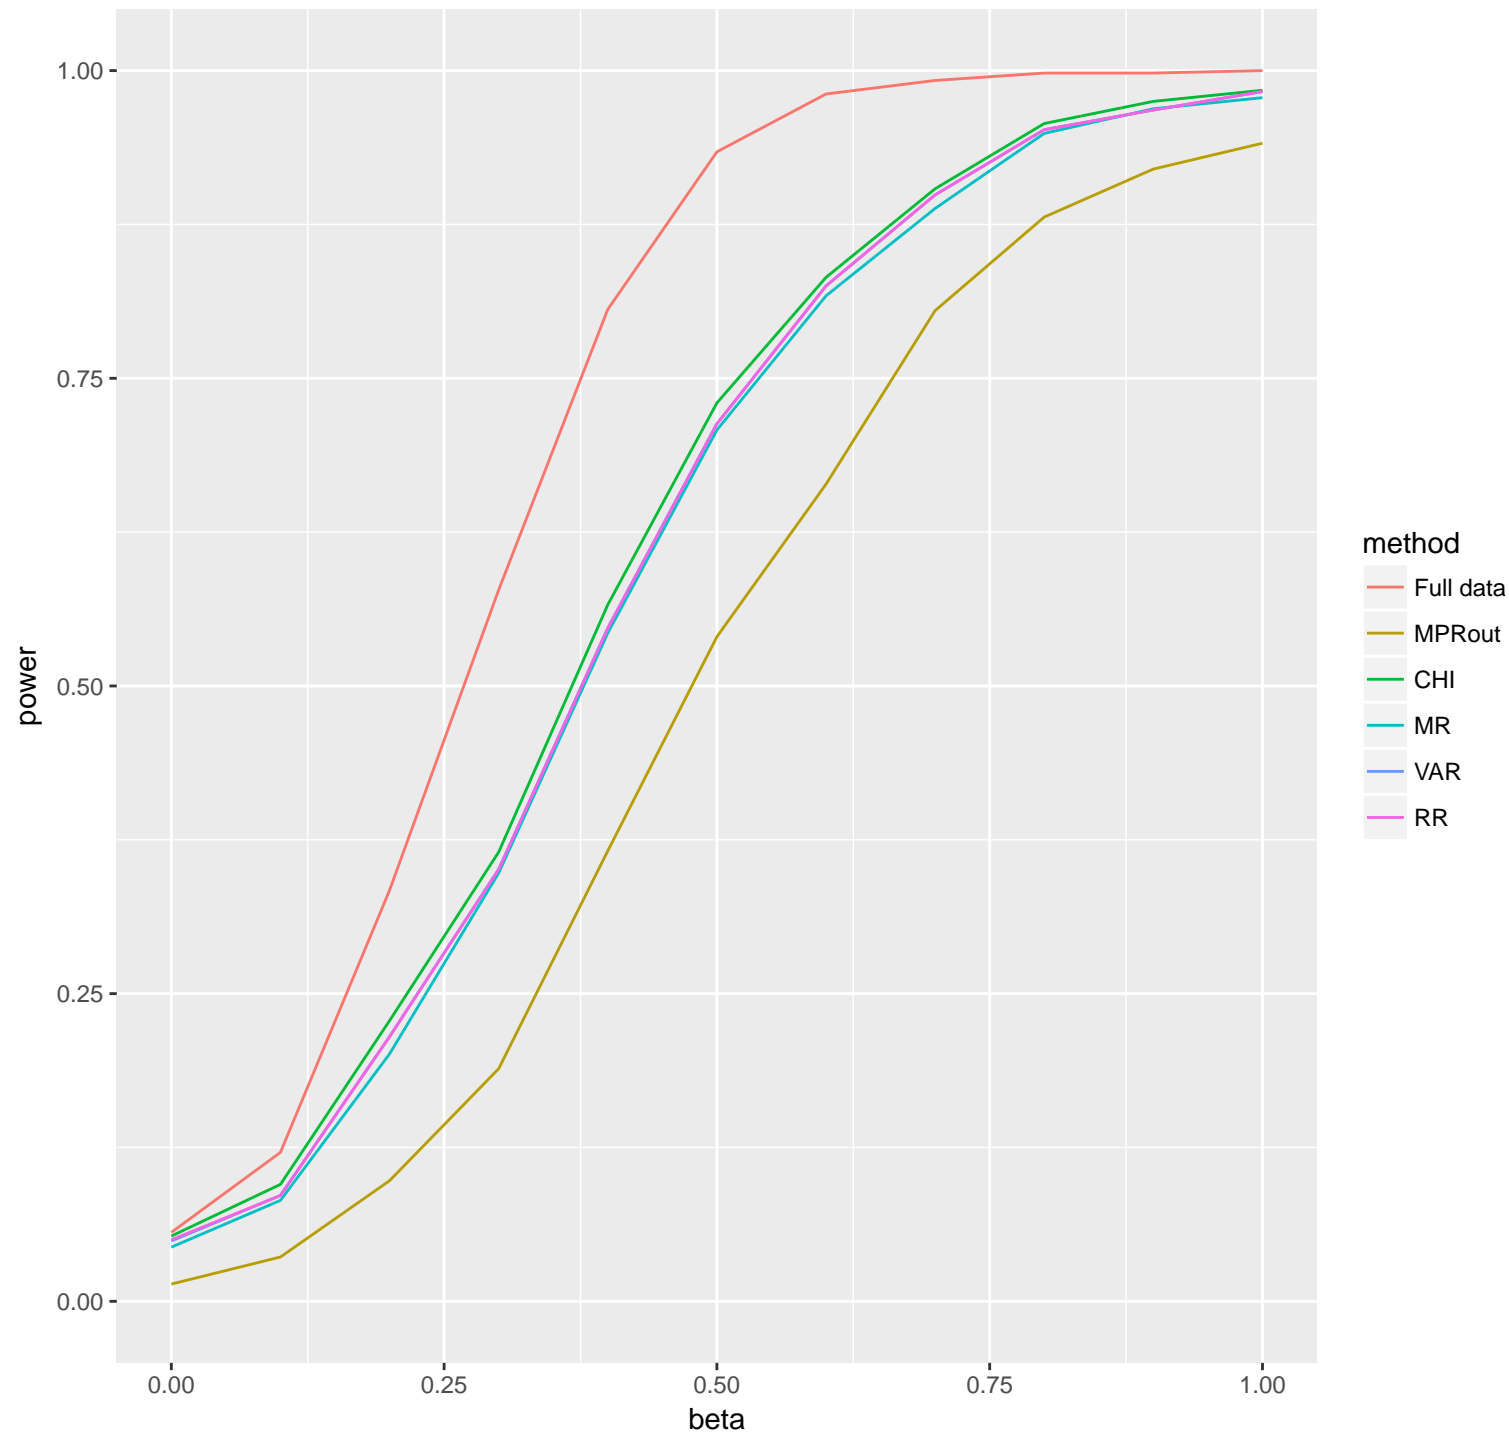

Supplement: MOESM2 [file 14233018]
